# Supplementary material for: Transcriptome analysis reveals key genes involved in the regulation of nicotine biosynthesis at early time points after topping in tobacco (Nicotiana tabacum L.)
Source: BMC Plant Biol. 2020 Jan 20;20:30. doi: 10.1186/s12870-020-2241-9 (PMC6971868; doi:10.1186/s12870-020-2241-9)
Supplement: Supplementary file 6 — Additional file 6: Table S1. Quality and mapping rates of RNA-Seq data. [file 12870_2020_2241_MOESM6_ESM.xlsx]

## Sheet: Sheet1
Table S1 Quality and mapping rate of RNA-Seq data.
The samples taken at t=0 h, 0.5 h, 1 h, 3 h, 5 h, 8 h, and 24 h after topping are indicated with the prefixes BWR0, BWR0.5, BWR1, BWR3, BWR5, BWR8, and BWR24 in the sample names, with replicates indicated after the dash.
Sample Names	Total Reads	Clean Reads	Clean Bases	GC Content (%)	Mapping Rate (%)	Unique Mapping Rate (%)	Multiple Mapping Rate (%)
BWR0-1A	67326356	63284390	5682922882	42.4491	91.65	82.1047	9.54882
BWR0-2A	67861678	67671466	6077180491	42.2538	97.61	87.6704	9.93752
BWR0-3A	66913984	60488090	5431691012	42.2644	94.75	84.8894	9.86048
BWR0.5-1A	66917570	66803600	6000208076	42.3693	97.71	88.2182	9.49365
BWR0.5-2A	67432798	67303150	6045304644	42.2714	97.4	87.9493	9.44793
BWR0.5-3A	68762534	68600538	6161701848	42.435	97.31	87.7798	9.52775
BWR1-1A	68748486	68556722	6157954323	42.1377	97.59	87.8968	9.68899
BWR1-3A	68597940	67781106	6088030481	42.4754	97.57	87.7156	9.85901
BWR3-1A	67101530	66974042	6015522261	42.507	97.6	88.0613	9.54358
BWR3-2A	66839038	66732686	5993053509	42.6965	97.59	88.06	9.52746
BWR3-3A	54549090	54410818	4887244961	42.1972	97.52	87.5451	9.97942
BWR5-1A	67034434	66926840	6010874225	42.4872	97.69	87.9398	9.75226
BWR5-2A	68497088	54955988	4935594100	42.6484	94.72	85.0668	9.65114
BWR8-1A	67706386	65247440	5860458400	42.4856	96.76	87.1074	9.65675
BWR8-3A	67439668	66876244	6006637717	42.6581	95.88	86.3611	9.51434
BWR24-1A	73463492	73349810	6587544098	42.5883	97.85	88.3467	9.5053
BWR24-2A	66896860	66767196	5996654307	42.5735	97.76	88.1207	9.64237
BWR24-3A	67502806	67300540	6044124244	42.6474	97.28	87.712	9.57138
