# Supplementary material for: Transcriptome analysis reveals key genes involved in the regulation of nicotine biosynthesis at early time points after topping in tobacco (Nicotiana tabacum L.)
Source: BMC Plant Biol. 2020 Jan 20;20:30. doi: 10.1186/s12870-020-2241-9 (PMC6971868; doi:10.1186/s12870-020-2241-9)
Supplement: Supplementary file 9 — Additional file 9: Table S4. Differentially transcribed transcription factors after topping. [file 12870_2020_2241_MOESM9_ESM.xlsx]

## Sheet: Sheet1
Table S4. Differentially transcribed transcription factors after topping in tobacco
The log2 fold changes of the FPKM values at each time point after topping as compared to that of the sample at t=0 h are shown, with significantly up-regulated and down-regulated genes displayed on red and green backgrounds, respectively.
TF familis	Gene ID	Tomato_desc	Mean FPKMs at t=0	Log2FC
				log2FC_0.5h	log2FC_1h	log2FC_3h	log2FC_5h	log2FC_8h	log2FC_24h					0.5h	1h	3h	5h	8h	24h
ABI3VP1	Nitab4.5_0000090g0070	B3 domain-containing protein LOC_Os12g40080 IPR003340 Transcriptional factor B3	3.72314	-1.42749	-0.811071	0.292006	0.134417	0.359201	0.294012					Nitab4.5_0000002g0040	Nitab4.5_0000003g0200	Nitab4.5_0000003g0280	Nitab4.5_0000002g0160	Nitab4.5_0000002g0140	Nitab4.5_0000002g0040
	Nitab4.5_0012411g0010	Auxin response factor 24 IPR003340 Transcriptional factor B3	18.1408	-0.0938412	-0.232585	-0.34493	-1.28572	-0.771195	-0.00479283					Nitab4.5_0000002g0160	Nitab4.5_0000004g0140	Nitab4.5_0000003g0950	Nitab4.5_0000006g0100	Nitab4.5_0000002g0160	Nitab4.5_0000002g0160
	Nitab4.5_0015619g0010	Auxin response factor 24 IPR003340 Transcriptional factor B3	13.417	-0.449564	-0.177826	-0.5383	-1.43048	-1.20535	-0.0882883					Nitab4.5_0000003g0070	Nitab4.5_0000005g0090	Nitab4.5_0000006g0100	Nitab4.5_0000006g0440	Nitab4.5_0000003g0070	Nitab4.5_0000003g0060
AP2-EREBP	Nitab4.5_0000044g0100	Ethylene responsive transcription factor 1a IPR001471 Pathogenesis-related transcriptional factor and ERF, DNA-binding	7.94387	3.7234	3.27159	-1.73325	-1.11436	-0.259919	-1.36731					Nitab4.5_0000003g0200	Nitab4.5_0000006g0090	Nitab4.5_0000008g0270	Nitab4.5_0000007g0150	Nitab4.5_0000003g0200	Nitab4.5_0000003g0200
	Nitab4.5_0000105g0290	Ethylene responsive transcription factor 1b IPR001471 Pathogenesis-related transcriptional factor and ERF, DNA-binding IPR017392 Pathogenesis-related genes transcriptional activator PTI6	13.0565	1.78412	1.52506	-0.339411	0.0141092	0.707854	0.315328					Nitab4.5_0000004g0140	Nitab4.5_0000006g0100	Nitab4.5_0000008g0860	Nitab4.5_0000007g0210	Nitab4.5_0000003g0420	Nitab4.5_0000005g0090
	Nitab4.5_0000116g0330	Ethylene responsive transcription factor 2b IPR001471 Pathogenesis-related transcriptional factor and ERF, DNA-binding IPR001711 Phospholipase C, phosphatidylinositol-specific, Y domain	30.525	1.34788	0.849866	-0.210107	0.193627	-0.694642	-0.390959					Nitab4.5_0000005g0090	Nitab4.5_0000007g0320	Nitab4.5_0000013g0380	Nitab4.5_0000008g0010	Nitab4.5_0000005g0420	Nitab4.5_0000005g0420
	Nitab4.5_0000132g0110	Ethylene-responsive transcription factor 1 IPR001471 Pathogenesis-related transcriptional factor and ERF, DNA-binding	0	13.5197	11.8283	11.4005	10.174	0	10.6828					Nitab4.5_0000006g0090	Nitab4.5_0000008g0270	Nitab4.5_0000013g0390	Nitab4.5_0000008g0030	Nitab4.5_0000006g0100	Nitab4.5_0000005g0580
	Nitab4.5_0000287g0030	Ethylene-responsive transcription factor 5 IPR001471 Pathogenesis-related transcriptional factor and ERF, DNA-binding	38.2084	1.00968	0.424192	-0.342252	-1.268	-1.01585	0.0260348					Nitab4.5_0000006g0100	Nitab4.5_0000008g0500	Nitab4.5_0000013g0470	Nitab4.5_0000008g0130	Nitab4.5_0000006g0530	Nitab4.5_0000006g0100
	Nitab4.5_0000305g0140	Ethylene-responsive transcription factor 4 IPR001471 Pathogenesis-related transcriptional factor and ERF, DNA-binding	2.49958	2.49966	1.46489	-0.369665	0.250924	0.595129	-0.0704666					Nitab4.5_0000008g0030	Nitab4.5_0000008g0670	Nitab4.5_0000015g0360	Nitab4.5_0000008g0180	Nitab4.5_0000007g0210	Nitab4.5_0000006g0440
	Nitab4.5_0000423g0060	Ethylene responsive transcription factor 2a IPR001471 Pathogenesis-related transcriptional factor and ERF, DNA-binding	4.05062	1.20707	-0.250536	-0.932491	-1.08042	-0.469202	-0.816078					Nitab4.5_0000008g0180	Nitab4.5_0000008g0860	Nitab4.5_0000015g0370	Nitab4.5_0000008g0200	Nitab4.5_0000007g0320	Nitab4.5_0000006g0580
	Nitab4.5_0000436g0180	Ethylene-responsive transcription factor 14 IPR001471 Pathogenesis-related transcriptional factor and ERF, DNA-binding	12.4831	-2.21178	-1.78334	-2.3669	-3.46752	-2.38535	-3.32897					Nitab4.5_0000008g0210	Nitab4.5_0000008g0870	Nitab4.5_0000019g0100	Nitab4.5_0000008g0240	Nitab4.5_0000008g0030	Nitab4.5_0000008g0030
	Nitab4.5_0000470g0230	Ethylene-responsive transcription factor 2 IPR001471 Pathogenesis-related transcriptional factor and ERF, DNA-binding	2.91932	2.15924	3.05114	-3.19215	-1.16797	-1.9493	-1.19295					Nitab4.5_0000008g0270	Nitab4.5_0000009g0500	Nitab4.5_0000022g0430	Nitab4.5_0000008g0270	Nitab4.5_0000008g0180	Nitab4.5_0000008g0130
	Nitab4.5_0000512g0230	Ethylene responsive transcription factor 2a IPR001471 Pathogenesis-related transcriptional factor and ERF, DNA-binding	13.2932	-1.78906	-1.29902	-0.377634	-1.81606	-2.95551	-0.591022					Nitab4.5_0000008g0640	Nitab4.5_0000015g0100	Nitab4.5_0000028g0320	Nitab4.5_0000014g0480	Nitab4.5_0000008g0200	Nitab4.5_0000008g0180
	Nitab4.5_0000516g0110	Ethylene-responsive transcription factor 4 IPR001471 Pathogenesis-related transcriptional factor and ERF, DNA-binding	37.6653	1.16615	0.572021	-0.295897	-0.169778	-0.0204246	0.382292					Nitab4.5_0000008g0670	Nitab4.5_0000015g0330	Nitab4.5_0000028g0460	Nitab4.5_0000015g0020	Nitab4.5_0000008g0210	Nitab4.5_0000008g0270
	Nitab4.5_0000600g0050	Ethylene responsive transcription factor 1a IPR001471 Pathogenesis-related transcriptional factor and ERF, DNA-binding	13.3794	-1.49888	-0.923113	-0.207185	0.023523	0.268665	0.252103					Nitab4.5_0000008g0840	Nitab4.5_0000021g0010	Nitab4.5_0000030g0070	Nitab4.5_0000015g0370	Nitab4.5_0000008g0270	Nitab4.5_0000008g0500
	Nitab4.5_0000600g0060	Ethylene-responsive transcription factor 2 IPR001471 Pathogenesis-related transcriptional factor and ERF, DNA-binding	16.243	-1.16218	-0.603612	-0.109563	0.321692	0.336874	0.398043					Nitab4.5_0000008g0860	Nitab4.5_0000021g0120	Nitab4.5_0000032g0010	Nitab4.5_0000016g0360	Nitab4.5_0000008g0670	Nitab4.5_0000008g0670
	Nitab4.5_0000600g0080	(ERF32_S) Ethylene responsive transcription factor 1b IPR001471 Pathogenesis-related transcriptional factor and ERF, DNA-binding	9.02969	1.02768	0.97627	-0.767252	0.304379	0.510826	-0.0133325					Nitab4.5_0000008g0870	Nitab4.5_0000022g0430	Nitab4.5_0000033g0360	Nitab4.5_0000019g0100	Nitab4.5_0000009g0310	Nitab4.5_0000008g0820
	Nitab4.5_0000734g0070	Ethylene responsive transcription factor 1a IPR001471 Pathogenesis-related transcriptional factor and ERF, DNA-binding	12.931	-1.23714	-0.721379	-0.0781651	-0.126479	0.0551748	0.611792					Nitab4.5_0000009g0270	Nitab4.5_0000023g0450	Nitab4.5_0000034g0250	Nitab4.5_0000021g0010	Nitab4.5_0000010g0180	Nitab4.5_0000010g0180
	Nitab4.5_0000777g0080	Ethylene-responsive transcription factor 1A IPR001471 Pathogenesis-related transcriptional factor and ERF, DNA-binding	10.3227	1.14846	1.00851	-1.03306	-0.47235	-0.639472	-0.706411					Nitab4.5_0000009g0350	Nitab4.5_0000025g0260	Nitab4.5_0000038g0140	Nitab4.5_0000021g0570	Nitab4.5_0000010g0210	Nitab4.5_0000010g0190
	Nitab4.5_0001035g0010	Ethylene-responsive transcription factor 9 IPR001471 Pathogenesis-related transcriptional factor and ERF, DNA-binding	20.6634	-1.66951	-0.232097	0.288878	1.46505	0.434191	-1.21046					Nitab4.5_0000009g0500	Nitab4.5_0000025g0340	Nitab4.5_0000040g0070	Nitab4.5_0000022g0430	Nitab4.5_0000012g0130	Nitab4.5_0000010g0210
	Nitab4.5_0001088g0170	Ethylene-responsive transcription factor 2 IPR001471 Pathogenesis-related transcriptional factor and ERF, DNA-binding	52.5957	-2.57719	-1.51208	-0.901331	-0.863648	-1.1018	-0.511421					Nitab4.5_0000010g0130	Nitab4.5_0000026g0030	Nitab4.5_0000040g0110	Nitab4.5_0000025g0180	Nitab4.5_0000013g0380	Nitab4.5_0000013g0380
	Nitab4.5_0001088g0180	Ethylene-responsive transcription factor 2 IPR001471 Pathogenesis-related transcriptional factor and ERF, DNA-binding	58.0098	-1.14437	-0.827392	-0.653591	-0.705497	-0.887458	-0.483677					Nitab4.5_0000010g0180	Nitab4.5_0000027g0550	Nitab4.5_0000040g0270	Nitab4.5_0000026g0020	Nitab4.5_0000013g0390	Nitab4.5_0000013g0390
	Nitab4.5_0001088g0200	Ethylene-responsive transcription factor 2 IPR001471 Pathogenesis-related transcriptional factor and ERF, DNA-binding	6.02177	-3.01097	-1.77134	-2.24316	-2.06914	-1.18084	-1.76265					Nitab4.5_0000010g0210	Nitab4.5_0000028g0320	Nitab4.5_0000043g0270	Nitab4.5_0000026g0030	Nitab4.5_0000015g0360	Nitab4.5_0000015g0050
	Nitab4.5_0001184g0040	Ethylene-responsive transcription factor 4 IPR001471 Pathogenesis-related transcriptional factor and ERF, DNA-binding	53.7668	1.50467	0.7538	-0.169233	0.312137	0.695162	0.702521					Nitab4.5_0000013g0470	Nitab4.5_0000028g0350	Nitab4.5_0000043g0330	Nitab4.5_0000028g0170	Nitab4.5_0000015g0370	Nitab4.5_0000015g0360
	Nitab4.5_0001441g0060	Ethylene-responsive transcription factor 14 IPR001471 Pathogenesis-related transcriptional factor and ERF, DNA-binding	7.03379	-2.41725	-1.83978	-3.2495	-3.05047	-3.01139	-2.79098					Nitab4.5_0000014g0440	Nitab4.5_0000029g0210	Nitab4.5_0000044g0100	Nitab4.5_0000028g0320	Nitab4.5_0000016g0360	Nitab4.5_0000015g0370
	Nitab4.5_0001494g0060	AP2-like ethylene-responsive transcription factor At1g16060 IPR001471 Pathogenesis-related transcriptional factor and ERF, DNA-binding	16.3373	-1.45987	-0.0821085	0.0104061	0.541552	0.399222	-0.774075					Nitab4.5_0000015g0050	Nitab4.5_0000030g0450	Nitab4.5_0000045g0110	Nitab4.5_0000029g0210	Nitab4.5_0000019g0100	Nitab4.5_0000015g0380
	Nitab4.5_0001731g0020	Ethylene responsive transcription factor 1a IPR001471 Pathogenesis-related transcriptional factor and ERF, DNA-binding	8.45567	-1.50793	-0.783212	-0.123467	-0.154279	0.202248	0.518372					Nitab4.5_0000015g0100	Nitab4.5_0000033g0300	Nitab4.5_0000046g0200	Nitab4.5_0000031g0070	Nitab4.5_0000019g0160	Nitab4.5_0000016g0160
	Nitab4.5_0002230g0030	Ethylene responsive transcription factor 2a IPR001471 Pathogenesis-related transcriptional factor and ERF, DNA-binding	9.36565	1.32023	0.268571	-0.966091	-0.733033	-0.674724	-0.354197					Nitab4.5_0000015g0330	Nitab4.5_0000033g0360	Nitab4.5_0000048g0070	Nitab4.5_0000033g0360	Nitab4.5_0000021g0120	Nitab4.5_0000019g0100
	Nitab4.5_0002350g0030	Ethylene-responsive transcription factor 4 IPR001471 Pathogenesis-related transcriptional factor and ERF, DNA-binding	31.7911	1.3445	0.517391	-0.0925343	0.271129	0.615987	0.678431					Nitab4.5_0000015g0370	Nitab4.5_0000034g0220	Nitab4.5_0000050g0270	Nitab4.5_0000034g0020	Nitab4.5_0000021g0200	Nitab4.5_0000021g0090
	Nitab4.5_0002377g0030	Ethylene-responsive transcription factor 9 IPR001471 Pathogenesis-related transcriptional factor and ERF, DNA-binding	12.21	-2.13516	-0.399838	-0.000178032	1.6502	0.403056	-1.60998					Nitab4.5_0000016g0360	Nitab4.5_0000036g0010	Nitab4.5_0000052g0250	Nitab4.5_0000034g0150	Nitab4.5_0000021g0470	Nitab4.5_0000021g0470
	Nitab4.5_0002526g0070	Ethylene responsive transcription factor 2a IPR001471 Pathogenesis-related transcriptional factor and ERF, DNA-binding	20.9709	-1.04984	-0.942136	-0.0560207	-0.884118	-1.07936	0.0114591					Nitab4.5_0000019g0060	Nitab4.5_0000037g0360	Nitab4.5_0000053g0180	Nitab4.5_0000034g0220	Nitab4.5_0000021g0570	Nitab4.5_0000021g1030
	Nitab4.5_0002577g0030	Ethylene responsive transcription factor 2b IPR001471 Pathogenesis-related transcriptional factor and ERF, DNA-binding	0.348709	3.60879	2.4994	-0.0534766	-2.48929	-2.09291	-1.4494					Nitab4.5_0000019g0100	Nitab4.5_0000038g0180	Nitab4.5_0000055g0250	Nitab4.5_0000036g0350	Nitab4.5_0000022g0430	Nitab4.5_0000023g0740
	Nitab4.5_0002683g0020	Ethylene-responsive transcription factor 1A IPR001471 Pathogenesis-related transcriptional factor and ERF, DNA-binding	4.99926	1.05139	0.817612	-0.334591	-0.0797883	-0.174322	-0.418536					Nitab4.5_0000020g0330	Nitab4.5_0000040g0250	Nitab4.5_0000059g0310	Nitab4.5_0000037g0140	Nitab4.5_0000023g0340	Nitab4.5_0000025g0190
	Nitab4.5_0002902g0060	Ethylene responsive transcription factor 1b IPR001471 Pathogenesis-related transcriptional factor and ERF, DNA-binding IPR017392 Pathogenesis-related genes transcriptional activator PTI6	8.72919	1.5446	1.09196	0.00435161	0.0550866	0.308723	0.23201					Nitab4.5_0000021g0060	Nitab4.5_0000041g0020	Nitab4.5_0000061g0270	Nitab4.5_0000037g0340	Nitab4.5_0000025g0180	Nitab4.5_0000025g0290
	Nitab4.5_0003039g0040	Ethylene-responsive transcription factor 13 IPR001471 Pathogenesis-related transcriptional factor and ERF, DNA-binding	7.28734	1.74432	-0.660191	0.0556249	0.245741	-0.446282	0.874					Nitab4.5_0000021g0200	Nitab4.5_0000043g0270	Nitab4.5_0000064g0080	Nitab4.5_0000038g0170	Nitab4.5_0000025g0290	Nitab4.5_0000026g0030
	Nitab4.5_0003137g0010	Ethylene responsive transcription factor 2a IPR001471 Pathogenesis-related transcriptional factor and ERF, DNA-binding	174.748	1.04664	0.440368	-0.0453901	-0.144865	0.0831213	0.407933					Nitab4.5_0000021g0720	Nitab4.5_0000043g0290	Nitab4.5_0000069g0230	Nitab4.5_0000040g0110	Nitab4.5_0000026g0030	Nitab4.5_0000026g0110
	Nitab4.5_0004682g0010	Ethylene-responsive transcription factor 2 IPR001471 Pathogenesis-related transcriptional factor and ERF, DNA-binding	23.1592	-1.72147	-0.356521	-0.200038	-0.130128	-2.04096	-0.362388					Nitab4.5_0000021g0930	Nitab4.5_0000044g0100	Nitab4.5_0000069g0390	Nitab4.5_0000040g0250	Nitab4.5_0000027g0110	Nitab4.5_0000028g0320
	Nitab4.5_0004738g0060	AP2-like ethylene-responsive transcription factor At1g16060 IPR001471 Pathogenesis-related transcriptional factor and ERF, DNA-binding	1.04454	1.63748	0.360071	1.02533	0.740463	0.943799	0.80117					Nitab4.5_0000023g0450	Nitab4.5_0000046g0020	Nitab4.5_0000069g0590	Nitab4.5_0000040g0270	Nitab4.5_0000028g0320	Nitab4.5_0000029g0110
	Nitab4.5_0005011g0070	Ethylene-responsive transcription factor 11 IPR001471 Pathogenesis-related transcriptional factor and ERF, DNA-binding	2.86433	1.73629	0.947722	0.0154561	-0.459982	-2.07334	-0.584025					Nitab4.5_0000023g0680	Nitab4.5_0000048g0080	Nitab4.5_0000070g0110	Nitab4.5_0000041g0020	Nitab4.5_0000029g0210	Nitab4.5_0000030g0070
	Nitab4.5_0006479g0010	Ethylene responsive transcription factor 2b IPR001471 Pathogenesis-related transcriptional factor and ERF, DNA-binding	0.536551	2.00968	-0.237447	-0.57501	-0.555675	-1.32069	0.314823					Nitab4.5_0000023g0740	Nitab4.5_0000057g0160	Nitab4.5_0000070g0130	Nitab4.5_0000043g0270	Nitab4.5_0000031g0070	Nitab4.5_0000030g0350
	Nitab4.5_0007571g0020	Ethylene responsive transcription factor 1a IPR001471 Pathogenesis-related transcriptional factor and ERF, DNA-binding	0.409716	4.21	3.70804	-2.5325	0.38898	-0.499569	-0.679882					Nitab4.5_0000025g0180	Nitab4.5_0000058g0120	Nitab4.5_0000070g0190	Nitab4.5_0000045g0110	Nitab4.5_0000031g0370	Nitab4.5_0000030g0450
	Nitab4.5_0007739g0010	Ethylene responsive transcription factor 1a IPR001471 Pathogenesis-related transcriptional factor and ERF, DNA-binding	21.6416	-1.7001	-0.564295	-0.127879	0.0283523	0.261146	0.125913					Nitab4.5_0000025g0260	Nitab4.5_0000059g0320	Nitab4.5_0000074g0100	Nitab4.5_0000046g0200	Nitab4.5_0000031g0400	Nitab4.5_0000031g0370
	Nitab4.5_0007739g0040	Ethylene-responsive transcription factor 2 IPR001471 Pathogenesis-related transcriptional factor and ERF, DNA-binding	3.99296	-1.14645	-0.69216	-0.154445	-0.222891	0.145972	0.447342					Nitab4.5_0000025g0560	Nitab4.5_0000063g0340	Nitab4.5_0000078g0160	Nitab4.5_0000049g0180	Nitab4.5_0000031g0420	Nitab4.5_0000031g0400
	Nitab4.5_0009818g0010	AP2-like ethylene-responsive transcription factor At1g16060 IPR001471 Pathogenesis-related transcriptional factor and ERF, DNA-binding	13.4896	-1.25526	0.179291	-0.0444259	0.593808	0.510758	-0.680002					Nitab4.5_0000026g0020	Nitab4.5_0000067g0120	Nitab4.5_0000080g0010	Nitab4.5_0000051g0380	Nitab4.5_0000031g0470	Nitab4.5_0000031g0420
	Nitab4.5_0010294g0020	Ethylene-responsive transcription factor 2 IPR001471 Pathogenesis-related transcriptional factor and ERF, DNA-binding	25.1309	-1.50926	-1.21307	-0.715075	-0.74736	-1.31423	-0.491815					Nitab4.5_0000026g0030	Nitab4.5_0000068g0290	Nitab4.5_0000085g0060	Nitab4.5_0000053g0180	Nitab4.5_0000032g0400	Nitab4.5_0000032g0460
	Nitab4.5_0010294g0030	Ethylene-responsive transcription factor 2 IPR001471 Pathogenesis-related transcriptional factor and ERF, DNA-binding	34.0341	-1.76157	-1.62949	-0.988286	-0.84478	-1.31961	-0.878122					Nitab4.5_0000026g0280	Nitab4.5_0000070g0110	Nitab4.5_0000090g0240	Nitab4.5_0000055g0100	Nitab4.5_0000033g0360	Nitab4.5_0000033g0370
	Nitab4.5_0012194g0010	(NtERF10_S) Ethylene-responsive transcription factor 1A IPR001471 Pathogenesis-related transcriptional factor and ERF, DNA-binding	4.73148	1.62032	0.477665	-0.654572	-0.443319	-0.829355	-0.179097					Nitab4.5_0000027g0190	Nitab4.5_0000076g0060	Nitab4.5_0000101g0120	Nitab4.5_0000059g0320	Nitab4.5_0000034g0150	Nitab4.5_0000036g0030
	Nitab4.5_0012385g0010	Ethylene-responsive transcription factor 13 IPR001471 Pathogenesis-related transcriptional factor and ERF, DNA-binding	1.16485	1.89387	0.160293	0.733196	0.0269874	-0.433141	1.00503					Nitab4.5_0000027g0550	Nitab4.5_0000081g0170	Nitab4.5_0000102g0010	Nitab4.5_0000061g0010	Nitab4.5_0000034g0220	Nitab4.5_0000036g0190
	Nitab4.5_0012460g0010	Ethylene-responsive transcription factor 4 IPR001471 Pathogenesis-related transcriptional factor and ERF, DNA-binding	3.24643	1.49462	1.1062	-0.0230705	0.529791	0.872966	0.495827					Nitab4.5_0000028g0170	Nitab4.5_0000082g0170	Nitab4.5_0000102g0080	Nitab4.5_0000062g0220	Nitab4.5_0000035g0230	Nitab4.5_0000037g0360
	Nitab4.5_0012899g0010	Ethylene-responsive transcription factor 4 IPR003340 Transcriptional factor B3	1.7769	1.72672	1.80313	0.424472	-0.470678	0.0490679	-0.554342					Nitab4.5_0000028g0320	Nitab4.5_0000084g0170	Nitab4.5_0000106g0360	Nitab4.5_0000063g0110	Nitab4.5_0000036g0030	Nitab4.5_0000040g0270
	Nitab4.5_0022145g0010	Ethylene responsive transcription factor 2a IPR001471 Pathogenesis-related transcriptional factor and ERF, DNA-binding	1.31162	-13.6792	-3.55607	0.21043	0.73682	-0.871392	0.717979					Nitab4.5_0000028g0350	Nitab4.5_0000085g0060	Nitab4.5_0000108g0050	Nitab4.5_0000068g0040	Nitab4.5_0000037g0360	Nitab4.5_0000041g0020
	Nitab4.5_0003022g0060	Ethylene responsive transcription factor 2a IPR001471 Pathogenesis-related transcriptional factor and ERF, DNA-binding	5.74259	-5.087	-3.85038	-0.30593	-1.16408	-3.32176	-1.65443					Nitab4.5_0000029g0210	Nitab4.5_0000097g0190	Nitab4.5_0000109g0350	Nitab4.5_0000068g0130	Nitab4.5_0000038g0160	Nitab4.5_0000043g0270
	Nitab4.5_0003811g0100	Ethylene-responsive transcription factor 7 IPR001471 Pathogenesis-related transcriptional factor and ERF, DNA-binding	1.65229	0.944632	2.11067	1.41458	2.08681	1.53043	-1.56296					Nitab4.5_0000029g0260	Nitab4.5_0000099g0080	Nitab4.5_0000110g0080	Nitab4.5_0000068g0400	Nitab4.5_0000040g0270	Nitab4.5_0000044g0100
	Nitab4.5_0001817g0020	Ethylene-responsive transcription factor 1 IPR001471 Pathogenesis-related transcriptional factor and ERF, DNA-binding	3.02633	0.351729	-0.610743	-1.87049	-0.360407	-0.699608	-0.679881					Nitab4.5_0000030g0450	Nitab4.5_0000099g0200	Nitab4.5_0000115g0140	Nitab4.5_0000069g0230	Nitab4.5_0000041g0300	Nitab4.5_0000044g0260
	Nitab4.5_0002402g0010	Ethylene responsive transcription factor 2a IPR001471 Pathogenesis-related transcriptional factor and ERF, DNA-binding	2.26103	0.290807	-0.606062	-2.44429	-2.5768	0.65195	0.425656					Nitab4.5_0000032g0460	Nitab4.5_0000101g0120	Nitab4.5_0000116g0120	Nitab4.5_0000069g0390	Nitab4.5_0000043g0270	Nitab4.5_0000045g0110
	Nitab4.5_0004682g0020	Ethylene-responsive transcription factor 1A IPR001471 Pathogenesis-related transcriptional factor and ERF, DNA-binding	31.2317	-0.387383	0.026841	-1.01922	-0.726692	-1.684	-0.810031					Nitab4.5_0000033g0300	Nitab4.5_0000102g0080	Nitab4.5_0000116g0410	Nitab4.5_0000070g0110	Nitab4.5_0000044g0620	Nitab4.5_0000046g0200
	Nitab4.5_0000015g0020	Ethylene responsive transcription factor 1a IPR001471 Pathogenesis-related transcriptional factor and ERF, DNA-binding	1.22056	1.27372	0.259029	1.23352	1.5614	0.606155	0.779253					Nitab4.5_0000033g0310	Nitab4.5_0000102g0140	Nitab4.5_0000118g0060	Nitab4.5_0000071g0010	Nitab4.5_0000045g0110	Nitab4.5_0000048g0210
	Nitab4.5_0000472g0020	Ethylene-responsive transcription factor 4 IPR001471 Pathogenesis-related transcriptional factor and ERF, DNA-binding	4.21613	-0.0764309	-0.0270908	0.239081	1.26929	1.10495	0.442186					Nitab4.5_0000033g0360	Nitab4.5_0000105g0200	Nitab4.5_0000119g0120	Nitab4.5_0000073g0500	Nitab4.5_0000048g0210	Nitab4.5_0000052g0250
	Nitab4.5_0000481g0010	Ethylene-responsive transcription factor 7 IPR001471 Pathogenesis-related transcriptional factor and ERF, DNA-binding	13.0889	-0.52523	0.176087	0.484862	1.35252	0.703572	-1.33069					Nitab4.5_0000034g0020	Nitab4.5_0000105g0290	Nitab4.5_0000123g0490	Nitab4.5_0000075g0240	Nitab4.5_0000049g0180	Nitab4.5_0000053g0180
	Nitab4.5_0000486g0010	Ethylene-responsive transcription factor 7 IPR001471 Pathogenesis-related transcriptional factor and ERF, DNA-binding	20.155	0.369717	0.421285	0.526479	1.23084	0.529386	-0.653244					Nitab4.5_0000036g0190	Nitab4.5_0000108g0460	Nitab4.5_0000129g0310	Nitab4.5_0000078g0010	Nitab4.5_0000052g0160	Nitab4.5_0000055g0100
	Nitab4.5_0003167g0010	Ethylene-responsive transcription factor 4 IPR001471 Pathogenesis-related transcriptional factor and ERF, DNA-binding	8.74919	-0.405858	-0.0431485	0.754872	1.22674	0.3434	0.112362					Nitab4.5_0000037g0140	Nitab4.5_0000109g0340	Nitab4.5_0000130g0140	Nitab4.5_0000078g0290	Nitab4.5_0000052g0250	Nitab4.5_0000055g0250
	Nitab4.5_0008728g0010	Ethylene-responsive transcription factor 5 IPR001471 Pathogenesis-related transcriptional factor and ERF, DNA-binding	44.2989	0.518313	-0.55483	-0.0324252	-1.60777	-1.92263	-0.772015					Nitab4.5_0000037g0230	Nitab4.5_0000116g0120	Nitab4.5_0000132g0350	Nitab4.5_0000090g0090	Nitab4.5_0000052g0270	Nitab4.5_0000057g0030
	Nitab4.5_0011338g0010	Ethylene responsive transcription factor 1a IPR001471 Pathogenesis-related transcriptional factor and ERF, DNA-binding	1.21051	1.15669	0.349038	1.19707	1.59994	0.866631	0.44476					Nitab4.5_0000037g0280	Nitab4.5_0000116g0290	Nitab4.5_0000134g0030	Nitab4.5_0000090g0240	Nitab4.5_0000052g0360	Nitab4.5_0000059g0310
	Nitab4.5_0000073g0330	Ethylene-responsive transcription factor 4 IPR001471 Pathogenesis-related transcriptional factor and ERF, DNA-binding	3.954	0.324379	-0.707933	0.061509	0.383658	2.41054	1.53293					Nitab4.5_0000037g0360	Nitab4.5_0000121g0090	Nitab4.5_0000136g0200	Nitab4.5_0000091g0300	Nitab4.5_0000053g0180	Nitab4.5_0000060g0050
	Nitab4.5_0000086g0010	Ethylene responsive transcription factor 1b IPR001471 Pathogenesis-related transcriptional factor and ERF, DNA-binding	1.90068	-2.0344	-0.204457	-2.22675	-3.2077	-14.2143	-1.38766					Nitab4.5_0000038g0150	Nitab4.5_0000121g0170	Nitab4.5_0000154g0300	Nitab4.5_0000091g0420	Nitab4.5_0000055g0060	Nitab4.5_0000062g0030
	Nitab4.5_0000400g0140	Ethylene-responsive transcription factor 4 IPR001471 Pathogenesis-related transcriptional factor and ERF, DNA-binding	8.3594	0.177437	-0.262118	-0.324628	-0.147569	1.99051	1.08731					Nitab4.5_0000040g0160	Nitab4.5_0000123g0170	Nitab4.5_0000155g0090	Nitab4.5_0000095g0150	Nitab4.5_0000055g0250	Nitab4.5_0000063g0130
	Nitab4.5_0000574g0150	Ethylene responsive transcription factor 1a IPR001471 Pathogenesis-related transcriptional factor and ERF, DNA-binding	36.3441	-0.352084	-0.760366	-0.27139	-0.480889	-1.56334	-0.288386					Nitab4.5_0000040g0250	Nitab4.5_0000127g0100	Nitab4.5_0000159g0160	Nitab4.5_0000101g0110	Nitab4.5_0000057g0080	Nitab4.5_0000068g0130
	Nitab4.5_0003090g0030	(ERF189_S) Ethylene responsive transcription factor 1b IPR001471 Pathogenesis-related transcriptional factor and ERF, DNA-binding	19.3452	0.797893	-0.091787	0.44869	-0.429219	1.00795	1.21948					Nitab4.5_0000040g0270	Nitab4.5_0000129g0160	Nitab4.5_0000163g0340	Nitab4.5_0000101g0120	Nitab4.5_0000057g0260	Nitab4.5_0000069g0230
	Nitab4.5_0004234g0120	Ethylene-responsive transcription factor 4 IPR001471 Pathogenesis-related transcriptional factor and ERF, DNA-binding	6.89407	0.346392	-0.877343	-0.503812	0.297963	2.00967	1.23435					Nitab4.5_0000040g0410	Nitab4.5_0000129g0310	Nitab4.5_0000167g0130	Nitab4.5_0000101g0220	Nitab4.5_0000058g0060	Nitab4.5_0000069g0390
	Nitab4.5_0004620g0030	(ERF91_S) Ethylene responsive transcription factor 1b IPR001471 Pathogenesis-related transcriptional factor and ERF, DNA-binding	1.10872	0.0872384	1.24709	0.272817	-1.85331	2.5152	1.71651					Nitab4.5_0000040g0440	Nitab4.5_0000132g0350	Nitab4.5_0000170g0180	Nitab4.5_0000102g0080	Nitab4.5_0000059g0310	Nitab4.5_0000070g0050
	Nitab4.5_0015055g0010	(ERF189_T) Ethylene responsive transcription factor 1b IPR001471 Pathogenesis-related transcriptional factor and ERF, DNA-binding	4.77971	0.300222	0.342594	1.16544	0.694562	2.03511	1.66143					Nitab4.5_0000040g0610	Nitab4.5_0000136g0270	Nitab4.5_0000175g0420	Nitab4.5_0000102g0140	Nitab4.5_0000059g0320	Nitab4.5_0000070g0190
	Nitab4.5_0025012g0010	Ethylene-responsive transcription factor 10 IPR001471 Pathogenesis-related transcriptional factor and ERF, DNA-binding	0	8.51953	10.0652	0	10.2131	12.9305	12.0817					Nitab4.5_0000041g0320	Nitab4.5_0000139g0010	Nitab4.5_0000184g0280	Nitab4.5_0000102g0250	Nitab4.5_0000060g0050	Nitab4.5_0000073g0330
	Nitab4.5_0000435g0080	Ethylene responsive transcription factor 2b IPR001471 Pathogenesis-related transcriptional factor and ERF, DNA-binding	0.738872	0.994274	-1.92172	-0.818805	0.286805	1.97098	2.39715					Nitab4.5_0000043g0210	Nitab4.5_0000142g0440	Nitab4.5_0000192g0120	Nitab4.5_0000103g0280	Nitab4.5_0000062g0220	Nitab4.5_0000073g0350
	Nitab4.5_0001874g0060	Ethylene-responsive transcription factor 1B IPR001471 Pathogenesis-related transcriptional factor and ERF, DNA-binding	0.367713	-1.73605	-0.649768	0.361588	0.077	-0.0419221	2.53367					Nitab4.5_0000043g0270	Nitab4.5_0000147g0400	Nitab4.5_0000192g0180	Nitab4.5_0000104g0310	Nitab4.5_0000062g0550	Nitab4.5_0000073g0500
	Nitab4.5_0003636g0050	Ethylene-responsive transcription factor 13 IPR001471 Pathogenesis-related transcriptional factor and ERF, DNA-binding	0.669922	1.38961	0.932081	1.78255	0.744717	0.913465	2.31088					Nitab4.5_0000043g0290	Nitab4.5_0000151g0320	Nitab4.5_0000194g0170	Nitab4.5_0000106g0170	Nitab4.5_0000062g0560	Nitab4.5_0000076g0060
	Nitab4.5_0003930g0020	AP2-like ethylene-responsive transcription factor At1g16060 IPR001471 Pathogenesis-related transcriptional factor and ERF, DNA-binding	2.77272	1.03006	0.738321	0.531816	0.848747	0.738638	1.02957					Nitab4.5_0000044g0100	Nitab4.5_0000152g0170	Nitab4.5_0000195g0240	Nitab4.5_0000108g0050	Nitab4.5_0000063g0110	Nitab4.5_0000077g0100
	Nitab4.5_0004161g0090	Ethylene-responsive transcription factor 4 IPR001471 Pathogenesis-related transcriptional factor and ERF, DNA-binding	1.0608	1.34388	-0.248505	1.09077	1.78804	0.778564	1.80989					Nitab4.5_0000044g0130	Nitab4.5_0000155g0090	Nitab4.5_0000198g0060	Nitab4.5_0000110g0080	Nitab4.5_0000063g0130	Nitab4.5_0000078g0010
	Nitab4.5_0005249g0050	Ethylene responsive transcription factor 2b IPR001471 Pathogenesis-related transcriptional factor and ERF, DNA-binding	0.923841	2.05498	-0.0524255	-0.118179	1.06028	2.13143	2.38713					Nitab4.5_0000044g0150	Nitab4.5_0000163g0340	Nitab4.5_0000198g0100	Nitab4.5_0000111g0160	Nitab4.5_0000066g0040	Nitab4.5_0000078g0270
ARF	Nitab4.5_0000476g0080	Auxin response factor 14 IPR003340 Transcriptional factor B3	3.53737	1.16132	0.865032	-0.520336	-0.402404	-0.0959578	0.043433					Nitab4.5_0000044g0490	Nitab4.5_0000165g0100	Nitab4.5_0000200g0190	Nitab4.5_0000114g0090	Nitab4.5_0000066g0110	Nitab4.5_0000081g0170
	Nitab4.5_0004657g0030	Auxin response factor 14 IPR003340 Transcriptional factor B3	42.3231	-1.27128	-0.963169	-0.651651	-1.37265	-1.4677	-1.96704					Nitab4.5_0000044g0620	Nitab4.5_0000166g0100	Nitab4.5_0000207g0030	Nitab4.5_0000115g0140	Nitab4.5_0000066g0190	Nitab4.5_0000084g0310
	Nitab4.5_0013243g0020	Auxin response factor 14 IPR003340 Transcriptional factor B3	47.2568	-1.45397	-0.977603	-0.627833	-1.94111	-1.98034	-2.06645					Nitab4.5_0000045g0110	Nitab4.5_0000170g0400	Nitab4.5_0000216g0090	Nitab4.5_0000116g0070	Nitab4.5_0000068g0400	Nitab4.5_0000090g0240
	Nitab4.5_0009330g0010	Auxin response factor 16 IPR010525 Auxin response factor	4.78641	0.40376	0.174699	-0.000689386	-0.0228586	-0.353946	1.16516					Nitab4.5_0000046g0200	Nitab4.5_0000175g0420	Nitab4.5_0000217g0070	Nitab4.5_0000116g0080	Nitab4.5_0000069g0230	Nitab4.5_0000091g0300
ARR-B	Nitab4.5_0000041g0320	Response regulator 11 IPR017053 Response regulator, plant B-type	46.805	1.15548	0.386434	-0.182802	-0.102869	-0.0468336	0.635533					Nitab4.5_0000048g0210	Nitab4.5_0000183g0030	Nitab4.5_0000218g0060	Nitab4.5_0000116g0120	Nitab4.5_0000069g0390	Nitab4.5_0000092g0310
	Nitab4.5_0001318g0010	Response regulator 11 IPR017053 Response regulator, plant B-type	26.4587	1.13886	0.191992	-0.0892154	0.148861	0.0362717	0.721003					Nitab4.5_0000048g0290	Nitab4.5_0000183g0080	Nitab4.5_0000218g0070	Nitab4.5_0000118g0060	Nitab4.5_0000070g0110	Nitab4.5_0000095g0150
	Nitab4.5_0002055g0150	Two-component response regulator ARR11 IPR006447 Myb-like DNA-binding region, SHAQKYF class	14.5691	0.166889	-0.0352161	-0.555836	-0.591729	-0.997382	-1.19034					Nitab4.5_0000052g0020	Nitab4.5_0000188g0210	Nitab4.5_0000221g0090	Nitab4.5_0000119g0080	Nitab4.5_0000073g0330	Nitab4.5_0000099g0090
AUX/IAA	Nitab4.5_0000187g0160	Auxin responsive protein IPR003311 AUX_IAA protein	2.89744	2.08522	0.386838	-0.261983	0.131705	0.089953	-0.371588					Nitab4.5_0000052g0270	Nitab4.5_0000188g0310	Nitab4.5_0000222g0170	Nitab4.5_0000119g0120	Nitab4.5_0000073g0420	Nitab4.5_0000099g0200
	Nitab4.5_0001044g0060	Auxin responsive protein IPR003311 AUX_IAA protein	6.9215	1.45508	0.558547	-0.15003	0.0308131	-0.248332	0.159689					Nitab4.5_0000052g0360	Nitab4.5_0000192g0200	Nitab4.5_0000222g0180	Nitab4.5_0000130g0130	Nitab4.5_0000074g0100	Nitab4.5_0000101g0120
	Nitab4.5_0001556g0100	Auxin responsive protein IPR003311 AUX_IAA protein	3.93412	1.59005	0.314504	0.0309277	0.398818	0.0356482	0.809406					Nitab4.5_0000052g0370	Nitab4.5_0000201g0250	Nitab4.5_0000227g0160	Nitab4.5_0000130g0140	Nitab4.5_0000075g0240	Nitab4.5_0000102g0010
	Nitab4.5_0002424g0010	Auxin responsive protein IPR003311 AUX_IAA protein	23.3028	1.70199	0.647948	-0.154775	-0.664367	0.443839	-6.19106e-06					Nitab4.5_0000053g0160	Nitab4.5_0000208g0350	Nitab4.5_0000227g0360	Nitab4.5_0000136g0200	Nitab4.5_0000077g0100	Nitab4.5_0000105g0130
	Nitab4.5_0003159g0010	Auxin responsive protein IPR003311 AUX_IAA protein	4.01056	1.58395	0.155355	-0.690404	-0.320619	0.410335	0.0199574					Nitab4.5_0000053g0180	Nitab4.5_0000214g0020	Nitab4.5_0000228g0080	Nitab4.5_0000143g0160	Nitab4.5_0000078g0010	Nitab4.5_0000107g0040
	Nitab4.5_0003885g0020	Auxin response factor 9 IPR003311 AUX_IAA protein	7.24926	1.43296	0.685015	1.39317	1.39969	1.8368	1.11089					Nitab4.5_0000055g0250	Nitab4.5_0000218g0060	Nitab4.5_0000234g0200	Nitab4.5_0000149g0170	Nitab4.5_0000078g0170	Nitab4.5_0000107g0090
	Nitab4.5_0004887g0040	Auxin responsive protein IPR003311 AUX_IAA protein	1.26746	1.85862	1.25069	0.552555	1.3967	1.00638	0.25951					Nitab4.5_0000057g0010	Nitab4.5_0000218g0070	Nitab4.5_0000235g0110	Nitab4.5_0000151g0410	Nitab4.5_0000079g0040	Nitab4.5_0000107g0220
	Nitab4.5_0004899g0110	Auxin responsive protein IPR003311 AUX_IAA protein	6.31723	1.46944	0.4445	-0.318001	0.037274	-0.451108	-0.0420713					Nitab4.5_0000057g0030	Nitab4.5_0000219g0010	Nitab4.5_0000237g0070	Nitab4.5_0000154g0300	Nitab4.5_0000080g0160	Nitab4.5_0000108g0050
	Nitab4.5_0005838g0020	Auxin responsive protein IPR003311 AUX_IAA protein	10.5027	1.13543	0.996979	1.40136	1.38254	0.783741	0.16185					Nitab4.5_0000057g0080	Nitab4.5_0000222g0170	Nitab4.5_0000242g0070	Nitab4.5_0000156g0150	Nitab4.5_0000084g0310	Nitab4.5_0000108g0260
	Nitab4.5_0011529g0020	Auxin response factor 9 IPR003311 AUX_IAA protein	75.8256	1.03418	1.26295	-0.0228906	-0.362659	0.012947	0.297027					Nitab4.5_0000057g0160	Nitab4.5_0000222g0350	Nitab4.5_0000244g0010	Nitab4.5_0000163g0110	Nitab4.5_0000086g0010	Nitab4.5_0000108g0460
	Nitab4.5_0009267g0030	Auxin responsive protein IPR003311 AUX_IAA protein	8.5112	0.615909	-0.209894	-1.19655	-0.741955	-1.38216	-1.08039					Nitab4.5_0000058g0120	Nitab4.5_0000234g0200	Nitab4.5_0000246g0100	Nitab4.5_0000163g0340	Nitab4.5_0000086g0050	Nitab4.5_0000109g0250
BES1	Nitab4.5_0000788g0010	BES1_BZR1 homolog protein 4 IPR008540 BZR1, transcriptional repressor	10.6146	0.339939	0.472616	0.604634	1.56577	1.49063	0.113235					Nitab4.5_0000058g0170	Nitab4.5_0000235g0110	Nitab4.5_0000252g0270	Nitab4.5_0000166g0120	Nitab4.5_0000086g0120	Nitab4.5_0000109g0460
bHLH	Nitab4.5_0000175g0070	BHLH transcription factor IPR001092 Basic helix-loop-helix dimerisation region bHLH	1.63683	1.48887	0.599385	-0.433173	0.978149	1.50897	-0.258091					Nitab4.5_0000059g0020	Nitab4.5_0000244g0180	Nitab4.5_0000256g0160	Nitab4.5_0000167g0130	Nitab4.5_0000090g0240	Nitab4.5_0000110g0080
	Nitab4.5_0000208g0350	Transcription factor IPR011598 Helix-loop-helix DNA-binding	1.01288	3.44625	2.62793	0.625676	1.35685	0.450231	0.273774					Nitab4.5_0000059g0240	Nitab4.5_0000244g0260	Nitab4.5_0000260g0100	Nitab4.5_0000170g0180	Nitab4.5_0000091g0300	Nitab4.5_0000110g0450
	Nitab4.5_0000274g0130	Transcription factor style2.1 IPR001092 Basic helix-loop-helix dimerisation region bHLH	3.33197	1.65424	2.75925	0.876345	1.08789	-0.0269965	-0.461547					Nitab4.5_0000059g0320	Nitab4.5_0000252g0040	Nitab4.5_0000263g0190	Nitab4.5_0000170g0350	Nitab4.5_0000093g0110	Nitab4.5_0000112g0010
	Nitab4.5_0000377g0210	BHLH transcription factor IPR011598 Helix-loop-helix DNA-binding	17.9341	1.36803	0.536289	-0.26879	-0.945641	-1.41852	-0.446145					Nitab4.5_0000062g0030	Nitab4.5_0000252g0240	Nitab4.5_0000263g0240	Nitab4.5_0000172g0370	Nitab4.5_0000093g0170	Nitab4.5_0000113g0010
	Nitab4.5_0000606g0020	BHLH transcription factor IPR011598 Helix-loop-helix DNA-binding	4.00227	1.25387	0.662065	-0.384131	0.205179	0.911314	0.374741					Nitab4.5_0000062g0220	Nitab4.5_0000255g0150	Nitab4.5_0000269g0110	Nitab4.5_0000173g0300	Nitab4.5_0000099g0090	Nitab4.5_0000115g0140
	Nitab4.5_0000870g0060	Transcription Factor IPR001092 Basic helix-loop-helix dimerisation region bHLH	5.98974	-2.79713	-0.82527	1.0836	0.954983	-1.39195	1.36082					Nitab4.5_0000062g0550	Nitab4.5_0000274g0130	Nitab4.5_0000270g0260	Nitab4.5_0000175g0140	Nitab4.5_0000099g0140	Nitab4.5_0000116g0120
	Nitab4.5_0000980g0160	Transcription factor (Fragment) IPR011598 Helix-loop-helix DNA-binding	17.6138	-1.04021	-0.833893	-0.402804	-0.406702	-1.4602	-0.109258					Nitab4.5_0000063g0130	Nitab4.5_0000274g0250	Nitab4.5_0000273g0090	Nitab4.5_0000178g0340	Nitab4.5_0000099g0230	Nitab4.5_0000116g0390
	Nitab4.5_0001167g0080	BHLH transcription factor-like IPR011598 Helix-loop-helix DNA-binding	12.0582	-4.0515	-2.61524	-0.00100735	-0.283683	-3.25518	-1.0084					Nitab4.5_0000064g0080	Nitab4.5_0000278g0010	Nitab4.5_0000274g0070	Nitab4.5_0000185g0250	Nitab4.5_0000101g0080	Nitab4.5_0000117g0050
	Nitab4.5_0001511g0020	BHLH transcription factor IPR011598 Helix-loop-helix DNA-binding	1.84168	1.2965	0.130374	0.30164	-0.167086	-1.47607	0.434121					Nitab4.5_0000066g0040	Nitab4.5_0000278g0030	Nitab4.5_0000274g0090	Nitab4.5_0000188g0240	Nitab4.5_0000101g0110	Nitab4.5_0000118g0060
	Nitab4.5_0001536g0060	Transcription factor IPR011598 Helix-loop-helix DNA-binding	0.699703	2.42075	1.33078	0.0969281	0.685304	0.138894	-0.0166849					Nitab4.5_0000068g0260	Nitab4.5_0000284g0070	Nitab4.5_0000274g0200	Nitab4.5_0000194g0170	Nitab4.5_0000101g0120	Nitab4.5_0000118g0110
	Nitab4.5_0001542g0060	BHLH transcription factor IPR011598 Helix-loop-helix DNA-binding	17.4417	1.10537	0.701026	-0.369685	-0.529692	-0.918255	-0.201223					Nitab4.5_0000068g0290	Nitab4.5_0000284g0090	Nitab4.5_0000278g0010	Nitab4.5_0000195g0240	Nitab4.5_0000101g0220	Nitab4.5_0000121g0040
	Nitab4.5_0001634g0050	Transcription Factor IPR001092 Basic helix-loop-helix dimerisation region bHLH	2.17953	-3.55439	-2.03562	0.47144	0.556501	-1.67149	0.100639					Nitab4.5_0000069g0230	Nitab4.5_0000286g0050	Nitab4.5_0000278g0030	Nitab4.5_0000198g0120	Nitab4.5_0000102g0080	Nitab4.5_0000121g0170
	Nitab4.5_0001634g0060	Transcription Factor IPR001092 Basic helix-loop-helix dimerisation region bHLH	3.53101	-1.95538	-1.67997	0.995547	1.56634	-1.06327	-0.717829					Nitab4.5_0000069g0390	Nitab4.5_0000288g0110	Nitab4.5_0000278g0040	Nitab4.5_0000200g0080	Nitab4.5_0000102g0140	Nitab4.5_0000123g0170
	Nitab4.5_0001643g0100	Transcription factor (Fragment) IPR011598 Helix-loop-helix DNA-binding	5.31403	1.51222	1.54904	0.610499	0.737931	0.531321	-0.948697					Nitab4.5_0000070g0010	Nitab4.5_0000297g0290	Nitab4.5_0000283g0120	Nitab4.5_0000201g0130	Nitab4.5_0000102g0300	Nitab4.5_0000125g0030
	Nitab4.5_0001763g0070	Transcription factor IPR011598 Helix-loop-helix DNA-binding	8.07678	1.34128	0.761289	-0.123653	-0.0408874	0.937887	0.49336					Nitab4.5_0000073g0150	Nitab4.5_0000297g0310	Nitab4.5_0000284g0090	Nitab4.5_0000203g0150	Nitab4.5_0000104g0210	Nitab4.5_0000125g0380
	Nitab4.5_0001897g0030	Transcription Factor IPR001092 Basic helix-loop-helix dimerisation region bHLH	11.1401	-2.05397	-0.633087	0.802322	0.112603	-0.847212	-0.144393					Nitab4.5_0000073g0500	Nitab4.5_0000302g0110	Nitab4.5_0000286g0050	Nitab4.5_0000204g0120	Nitab4.5_0000106g0170	Nitab4.5_0000129g0310
	Nitab4.5_0002278g0070	BHLH transcription factor IPR001092 Basic helix-loop-helix dimerisation region bHLH	4.23804	1.26208	0.150858	-0.10043	0.427315	0.753045	0.0433721					Nitab4.5_0000073g0550	Nitab4.5_0000304g0030	Nitab4.5_0000286g0060	Nitab4.5_0000207g0230	Nitab4.5_0000108g0050	Nitab4.5_0000130g0060
	Nitab4.5_0003180g0060	BHLH transcription factor IPR011598 Helix-loop-helix DNA-binding	0.545531	1.85947	0.885079	-0.318004	-2.93004	-1.77822	1.75219					Nitab4.5_0000075g0090	Nitab4.5_0000305g0100	Nitab4.5_0000288g0110	Nitab4.5_0000208g0370	Nitab4.5_0000108g0260	Nitab4.5_0000130g0140
	Nitab4.5_0003374g0070	BHLH transcription factor IPR011598 Helix-loop-helix DNA-binding	11.7655	1.49413	1.05208	-0.244049	0.00416306	0.214939	0.0491336					Nitab4.5_0000076g0200	Nitab4.5_0000305g0140	Nitab4.5_0000292g0090	Nitab4.5_0000209g0260	Nitab4.5_0000108g0290	Nitab4.5_0000130g0150
	Nitab4.5_0003526g0020	Transcription factor IPR011598 Helix-loop-helix DNA-binding	3.90726	-1.26745	-0.172059	0.10031	-0.63386	-1.14145	-0.825016					Nitab4.5_0000078g0010	Nitab4.5_0000308g0330	Nitab4.5_0000296g0140	Nitab4.5_0000209g0270	Nitab4.5_0000110g0020	Nitab4.5_0000132g0250
	Nitab4.5_0004154g0040	BHLH transcription factor IPR011598 Helix-loop-helix DNA-binding	4.73138	1.70568	0.921219	-0.195109	-0.513262	-0.519341	1.24556					Nitab4.5_0000078g0070	Nitab4.5_0000310g0220	Nitab4.5_0000297g0020	Nitab4.5_0000217g0100	Nitab4.5_0000116g0070	Nitab4.5_0000132g0350
	Nitab4.5_0004271g0060	Transcription factor (Fragment) IPR011598 Helix-loop-helix DNA-binding	3.07897	2.00684	1.78136	1.15943	0.694787	1.13573	-1.12385					Nitab4.5_0000078g0160	Nitab4.5_0000311g0030	Nitab4.5_0000305g0330	Nitab4.5_0000222g0170	Nitab4.5_0000116g0080	Nitab4.5_0000134g0030
	Nitab4.5_0004594g0050	BHLH transcription factor IPR011598 Helix-loop-helix DNA-binding	0.144498	2.66386	-0.0371032	0.939891	0.60857	0.883195	0.903855					Nitab4.5_0000079g0040	Nitab4.5_0000312g0090	Nitab4.5_0000305g0340	Nitab4.5_0000227g0160	Nitab4.5_0000118g0060	Nitab4.5_0000136g0200
	Nitab4.5_0004773g0010	BHLH transcription factor-like IPR011598 Helix-loop-helix DNA-binding	10.9107	-4.0587	-2.40576	0.300713	0.153336	-3.84744	-1.00758					Nitab4.5_0000080g0080	Nitab4.5_0000314g0090	Nitab4.5_0000307g0110	Nitab4.5_0000228g0080	Nitab4.5_0000121g0040	Nitab4.5_0000137g0170
	Nitab4.5_0006081g0010	BHLH transcription factor-like IPR011598 Helix-loop-helix DNA-binding	5.59201	-4.79168	-3.3877	-0.234561	-0.285452	-3.09081	-1.35854					Nitab4.5_0000081g0170	Nitab4.5_0000319g0040	Nitab4.5_0000308g0310	Nitab4.5_0000231g0490	Nitab4.5_0000121g0090	Nitab4.5_0000137g0340
	Nitab4.5_0006850g0020	BHLH transcription factor IPR011598 Helix-loop-helix DNA-binding	12.505	2.22834	1.83791	-0.258142	-0.713135	-0.975177	0.259878					Nitab4.5_0000082g0020	Nitab4.5_0000319g0220	Nitab4.5_0000308g0330	Nitab4.5_0000232g0150	Nitab4.5_0000121g0140	Nitab4.5_0000139g0010
	Nitab4.5_0010715g0010	BHLH transcription factor IPR011598 Helix-loop-helix DNA-binding	2.76354	1.71171	0.962662	-0.278807	-0.563048	-0.966959	1.45692					Nitab4.5_0000084g0490	Nitab4.5_0000322g0180	Nitab4.5_0000310g0220	Nitab4.5_0000235g0110	Nitab4.5_0000121g0170	Nitab4.5_0000142g0290
	Nitab4.5_0001117g0060	BHLH transcription factor IPR011598 Helix-loop-helix DNA-binding	34.7266	0.618903	1.26152	0.157416	-0.197836	0.50796	0.501793					Nitab4.5_0000085g0060	Nitab4.5_0000329g0240	Nitab4.5_0000312g0130	Nitab4.5_0000235g0130	Nitab4.5_0000123g0370	Nitab4.5_0000143g0610
	Nitab4.5_0007466g0010	Transcription factor bHLH126 IPR011598 Helix-loop-helix DNA-binding	1.9302	0.898975	1.73466	1.43073	-0.184842	2.0117	2.24667					Nitab4.5_0000086g0050	Nitab4.5_0000342g0270	Nitab4.5_0000314g0010	Nitab4.5_0000241g0060	Nitab4.5_0000123g0410	Nitab4.5_0000147g0400
	Nitab4.5_0001117g0070	BHLH transcription factor IPR011598 Helix-loop-helix DNA-binding	0.415552	1.59747	2.4828	2.17403	0.187045	2.22557	1.52279					Nitab4.5_0000088g0050	Nitab4.5_0000343g0190	Nitab4.5_0000314g0030	Nitab4.5_0000244g0010	Nitab4.5_0000130g0230	Nitab4.5_0000153g0190
	Nitab4.5_0002664g0090	BHLH transcription factor IPR011598 Helix-loop-helix DNA-binding	0.313231	-0.37449	0.819213	2.66008	0.69161	0.860349	1.06176					Nitab4.5_0000088g0120	Nitab4.5_0000348g0230	Nitab4.5_0000314g0050	Nitab4.5_0000244g0130	Nitab4.5_0000131g0030	Nitab4.5_0000154g0300
	Nitab4.5_0002810g0030	Transcription factor MYC2 IPR001092 Basic helix-loop-helix dimerisation region bHLH	10.2946	-1.14617	0.244914	1.29125	-0.764373	-1.03087	0.799052					Nitab4.5_0000090g0070	Nitab4.5_0000349g0060	Nitab4.5_0000314g0090	Nitab4.5_0000244g0140	Nitab4.5_0000132g0350	Nitab4.5_0000154g0310
	Nitab4.5_0003360g0050	BHLH transcription factor IPR011598 Helix-loop-helix DNA-binding	0.243024	0.0251994	0.451231	3.11799	0.0702719	0.773309	0.6353					Nitab4.5_0000090g0090	Nitab4.5_0000360g0100	Nitab4.5_0000314g0100	Nitab4.5_0000244g0350	Nitab4.5_0000134g0030	Nitab4.5_0000155g0200
	Nitab4.5_0009762g0040	Transcription factor MYC2 IPR001092 Basic helix-loop-helix dimerisation region bHLH	3.77878	-0.172682	0.192398	1.20602	-0.648927	-0.662378	0.71169					Nitab4.5_0000090g0190	Nitab4.5_0000363g0010	Nitab4.5_0000318g0220	Nitab4.5_0000252g0240	Nitab4.5_0000134g0070	Nitab4.5_0000156g0150
	Nitab4.5_0000354g0040	BHLH transcription factor IPR011598 Helix-loop-helix DNA-binding	3.95239	0.0198051	0.250872	-0.985025	-1.753	-1.33998	0.126904					Nitab4.5_0000090g0220	Nitab4.5_0000368g0310	Nitab4.5_0000319g0090	Nitab4.5_0000252g0270	Nitab4.5_0000136g0200	Nitab4.5_0000159g0100
	Nitab4.5_0003464g0030	BHLH transcription factor IPR011598 Helix-loop-helix DNA-binding	11.7505	0.227105	-0.553674	-0.870201	-1.16354	-2.49642	-1.60248					Nitab4.5_0000090g0230	Nitab4.5_0000368g0400	Nitab4.5_0000319g0160	Nitab4.5_0000260g0100	Nitab4.5_0000136g0270	Nitab4.5_0000159g0150
	Nitab4.5_0000093g0110	Transcription factor IPR011598 Helix-loop-helix DNA-binding	1.30013	-1.4812	0.243358	0.142823	0.499416	1.80962	1.25936					Nitab4.5_0000090g0330	Nitab4.5_0000373g0030	Nitab4.5_0000319g0220	Nitab4.5_0000261g0270	Nitab4.5_0000136g0340	Nitab4.5_0000164g0200
	Nitab4.5_0000093g0170	BHLH transcription factor IPR011598 Helix-loop-helix DNA-binding	19.6468	-0.961051	0.149605	0.632475	0.0614549	1.94822	0.884054					Nitab4.5_0000091g0280	Nitab4.5_0000375g0070	Nitab4.5_0000332g0130	Nitab4.5_0000263g0170	Nitab4.5_0000143g0510	Nitab4.5_0000165g0100
	Nitab4.5_0000136g0340	Transcription factor IPR011598 Helix-loop-helix DNA-binding	14.5453	-0.566708	-0.540944	-0.883903	-0.663963	-1.07488	-0.649243					Nitab4.5_0000091g0360	Nitab4.5_0000380g0050	Nitab4.5_0000335g0170	Nitab4.5_0000274g0040	Nitab4.5_0000149g0170	Nitab4.5_0000165g0110
	Nitab4.5_0000347g0090	Transcription factor bHLH126 IPR011598 Helix-loop-helix DNA-binding	1.42765	-1.61212	-0.0518848	-0.231742	-0.235254	2.6604	2.10249					Nitab4.5_0000092g0120	Nitab4.5_0000381g0130	Nitab4.5_0000337g0100	Nitab4.5_0000274g0250	Nitab4.5_0000154g0300	Nitab4.5_0000167g0130
	Nitab4.5_0000396g0170	Transcription factor IPR011598 Helix-loop-helix DNA-binding	1.507	-0.317832	1.01667	0.817645	0.817257	2.2737	1.67903					Nitab4.5_0000095g0150	Nitab4.5_0000383g0350	Nitab4.5_0000342g0080	Nitab4.5_0000278g0010	Nitab4.5_0000155g0090	Nitab4.5_0000170g0130
	Nitab4.5_0000396g0230	BHLH transcription factor IPR011598 Helix-loop-helix DNA-binding	31.3765	-0.404693	0.435368	0.769693	0.385423	1.44403	0.336956					Nitab4.5_0000097g0020	Nitab4.5_0000387g0060	Nitab4.5_0000355g0100	Nitab4.5_0000278g0030	Nitab4.5_0000155g0200	Nitab4.5_0000170g0180
	Nitab4.5_0000308g0220	Transcription factor IPR011598 Helix-loop-helix DNA-binding	8.54228	-0.401405	0.273398	-0.117042	-0.226905	-0.387959	-1.25817					Nitab4.5_0000099g0090	Nitab4.5_0000390g0030	Nitab4.5_0000359g0100	Nitab4.5_0000278g0040	Nitab4.5_0000156g0150	Nitab4.5_0000171g0190
	Nitab4.5_0000799g0020	BHLH transcription factor IPR011598 Helix-loop-helix DNA-binding	0.490929	0.33561	2.1698	0.178505	-1.19407	2.1359	1.89561					Nitab4.5_0000099g0140	Nitab4.5_0000391g0050	Nitab4.5_0000360g0030	Nitab4.5_0000280g0230	Nitab4.5_0000157g0160	Nitab4.5_0000178g0340
bZIP	Nitab4.5_0000027g0550	BZip transcription factor IPR011616 bZIP transcription factor, bZIP-1	2.68161	2.0141	1.65197	-1.21283	-0.978891	-2.48856	1.04812					Nitab4.5_0000099g0200	Nitab4.5_0000397g0010	Nitab4.5_0000368g0350	Nitab4.5_0000283g0120	Nitab4.5_0000161g0100	Nitab4.5_0000183g0030
	Nitab4.5_0000088g0120	BZIP transcription factor IPR011700 Basic leucine zipper	16.1996	1.44499	0.594705	0.0139058	-0.296949	0.0564604	0.475169					Nitab4.5_0000101g0080	Nitab4.5_0000401g0120	Nitab4.5_0000368g0400	Nitab4.5_0000286g0030	Nitab4.5_0000163g0110	Nitab4.5_0000185g0170
	Nitab4.5_0000287g0240	BZIP transcription factor IPR011616 bZIP transcription factor, bZIP-1	3.55479	2.53773	0.193352	-1.11938	-1.41467	0.0326617	1.12879					Nitab4.5_0000102g0080	Nitab4.5_0000402g0040	Nitab4.5_0000373g0030	Nitab4.5_0000286g0050	Nitab4.5_0000163g0340	Nitab4.5_0000185g0190
	Nitab4.5_0001002g0070	BZIP transcription factor IPR011616 bZIP transcription factor, bZIP-1	36.1301	-1.35629	-1.28907	-0.266207	-0.807592	-1.33632	0.0435574					Nitab4.5_0000102g0140	Nitab4.5_0000402g0160	Nitab4.5_0000376g0040	Nitab4.5_0000286g0060	Nitab4.5_0000166g0120	Nitab4.5_0000187g0220
	Nitab4.5_0001216g0060	BZIP transcription factor IPR011616 bZIP transcription factor, bZIP-1	4.2656	-2.4035	-1.56321	0.118881	-0.622253	-0.654149	0.832231					Nitab4.5_0000104g0070	Nitab4.5_0000403g0130	Nitab4.5_0000381g0130	Nitab4.5_0000287g0030	Nitab4.5_0000167g0130	Nitab4.5_0000190g0080
	Nitab4.5_0001428g0140	BZIP transcription factor IPR011616 bZIP transcription factor, bZIP-1	24.802	1.14776	-0.0490387	-0.0822735	-0.201074	-0.24297	-0.377156					Nitab4.5_0000105g0200	Nitab4.5_0000415g0070	Nitab4.5_0000381g0330	Nitab4.5_0000287g0240	Nitab4.5_0000171g0330	Nitab4.5_0000192g0200
	Nitab4.5_0001789g0110	BZIP transcription factor IPR011616 bZIP transcription factor, bZIP-1	0.379912	2.76613	1.83342	1.68256	2.22624	1.65587	0.9396					Nitab4.5_0000105g0290	Nitab4.5_0000418g0010	Nitab4.5_0000383g0230	Nitab4.5_0000287g0270	Nitab4.5_0000172g0370	Nitab4.5_0000195g0220
	Nitab4.5_0002262g0160	G-box binding factor 3 IPR012900 G-box binding, MFMR	2.55681	2.34165	0.955894	-0.496567	-0.921691	-0.213006	0.0477605					Nitab4.5_0000105g0350	Nitab4.5_0000421g0110	Nitab4.5_0000383g0350	Nitab4.5_0000288g0110	Nitab4.5_0000175g0070	Nitab4.5_0000195g0240
	Nitab4.5_0002543g0050	BZIP transcription factor IPR011616 bZIP transcription factor, bZIP-1	30.903	1.53477	0.46234	-0.00382854	-0.273927	0.15025	0.199543					Nitab4.5_0000107g0030	Nitab4.5_0000424g0010	Nitab4.5_0000387g0060	Nitab4.5_0000296g0140	Nitab4.5_0000175g0140	Nitab4.5_0000201g0090
	Nitab4.5_0002760g0050	BZIP transcription factor IPR011616 bZIP transcription factor, bZIP-1	2.8818	2.52453	0.141786	-0.863728	-1.12838	0.405107	1.15396					Nitab4.5_0000107g0090	Nitab4.5_0000425g0210	Nitab4.5_0000387g0080	Nitab4.5_0000297g0010	Nitab4.5_0000178g0340	Nitab4.5_0000201g0220
	Nitab4.5_0003080g0080	BZIP transcription factor IPR011616 bZIP transcription factor, bZIP-1	10.0322	1.61473	0.28014	-0.637673	-1.04725	-0.0338286	0.0234675					Nitab4.5_0000108g0020	Nitab4.5_0000430g0050	Nitab4.5_0000390g0030	Nitab4.5_0000299g0200	Nitab4.5_0000178g0360	Nitab4.5_0000201g0250
	Nitab4.5_0004756g0060	BZIP transcription factor IPR011616 bZIP transcription factor, bZIP-1	76.7452	-1.28949	-1.22426	-0.223777	-1.20905	-1.27411	0.0723794					Nitab4.5_0000108g0050	Nitab4.5_0000435g0090	Nitab4.5_0000400g0090	Nitab4.5_0000305g0330	Nitab4.5_0000180g0090	Nitab4.5_0000202g0460
	Nitab4.5_0005756g0030	NA	0.375327	2.68728	1.92025	0.0860219	0.260724	0.974435	-0.797049					Nitab4.5_0000108g0080	Nitab4.5_0000436g0180	Nitab4.5_0000402g0040	Nitab4.5_0000305g0340	Nitab4.5_0000181g0120	Nitab4.5_0000203g0140
	Nitab4.5_0007386g0010	G-box binding factor 3 IPR012900 G-box binding, MFMR	7.14978	1.55894	0.478232	0.00479839	-0.378389	-0.00914327	0.322285					Nitab4.5_0000108g0260	Nitab4.5_0000440g0100	Nitab4.5_0000402g0160	Nitab4.5_0000306g0340	Nitab4.5_0000185g0120	Nitab4.5_0000203g0150
	Nitab4.5_0007454g0020	BZIP transcription factor IPR011700 Basic leucine zipper	221.32	1.26753	0.632918	-0.0668683	0.149351	0.209009	0.287623					Nitab4.5_0000108g0460	Nitab4.5_0000440g0170	Nitab4.5_0000404g0200	Nitab4.5_0000307g0020	Nitab4.5_0000187g0220	Nitab4.5_0000205g0190
	Nitab4.5_0007480g0030	BZIP transcription factor IPR011616 bZIP transcription factor, bZIP-1	37.4596	1.01022	0.424169	-0.572988	-0.659144	-0.381416	-0.14137					Nitab4.5_0000109g0170	Nitab4.5_0000444g0150	Nitab4.5_0000415g0070	Nitab4.5_0000307g0330	Nitab4.5_0000189g0080	Nitab4.5_0000207g0030
	Nitab4.5_0007873g0010	BZIP transcription factor IPR011700 Basic leucine zipper	15.2635	1.12719	0.516963	-0.00735336	-0.281069	-0.0829248	0.312359					Nitab4.5_0000109g0460	Nitab4.5_0000445g0060	Nitab4.5_0000418g0010	Nitab4.5_0000308g0310	Nitab4.5_0000193g0120	Nitab4.5_0000207g0380
	Nitab4.5_0013628g0010	BZIP transcription factor IPR011616 bZIP transcription factor, bZIP-1	39.2312	-1.262	-1.12491	-0.0393518	-0.630877	-1.00776	0.440843					Nitab4.5_0000109g0570	Nitab4.5_0000460g0100	Nitab4.5_0000420g0030	Nitab4.5_0000308g0330	Nitab4.5_0000195g0220	Nitab4.5_0000212g0210
	Nitab4.5_0000755g0200	BZIP transcription factor IPR011616 bZIP transcription factor, bZIP-1	25.3824	-0.837545	-1.00785	0.034118	-0.571646	-0.647037	0.778419					Nitab4.5_0000110g0190	Nitab4.5_0000461g0280	Nitab4.5_0000425g0210	Nitab4.5_0000311g0030	Nitab4.5_0000195g0240	Nitab4.5_0000212g0270
	Nitab4.5_0004992g0010	BZIP transcription factor IPR011616 bZIP transcription factor, bZIP-1	17.4932	-0.345823	-1.19564	-0.246237	-0.153995	-0.450135	-0.478103					Nitab4.5_0000110g0320	Nitab4.5_0000462g0080	Nitab4.5_0000431g0020	Nitab4.5_0000312g0090	Nitab4.5_0000198g0120	Nitab4.5_0000215g0010
	Nitab4.5_0011932g0010	BZIP transcription factor IPR011616 bZIP transcription factor, bZIP-1	19.3136	-0.966103	-1.20348	-0.0671092	-0.199334	-0.569025	-0.374889					Nitab4.5_0000111g0130	Nitab4.5_0000462g0090	Nitab4.5_0000433g0070	Nitab4.5_0000312g0130	Nitab4.5_0000199g0040	Nitab4.5_0000218g0060
	Nitab4.5_0000246g0100	BZIP transcription factor family protein IPR011700 Basic leucine zipper	1.20253	-0.772304	0.85223	2.02775	1.37886	0.953728	-0.112229					Nitab4.5_0000115g0140	Nitab4.5_0000462g0170	Nitab4.5_0000436g0180	Nitab4.5_0000314g0050	Nitab4.5_0000200g0190	Nitab4.5_0000221g0040
	Nitab4.5_0000831g0030	BZIP transcription factor family protein IPR011700 Basic leucine zipper	2.05693	-1.33777	0.821922	1.93905	1.50018	0.721343	-0.581451					Nitab4.5_0000115g0270	Nitab4.5_0000463g0020	Nitab4.5_0000457g0160	Nitab4.5_0000314g0090	Nitab4.5_0000201g0220	Nitab4.5_0000221g0180
	Nitab4.5_0006823g0010	BZIP transcription factor family protein IPR011700 Basic leucine zipper	0.923477	0.032565	0.484955	1.69477	0.517413	-1.39901	0.223715					Nitab4.5_0000115g0330	Nitab4.5_0000463g0070	Nitab4.5_0000459g0060	Nitab4.5_0000316g0050	Nitab4.5_0000201g0240	Nitab4.5_0000222g0170
	Nitab4.5_0000149g0170	BZip transcription factor IPR011616 bZIP transcription factor, bZIP-1	68.2741	-0.977379	-0.652822	-0.433571	-1.11002	-2.41669	0.050301					Nitab4.5_0000116g0120	Nitab4.5_0000470g0190	Nitab4.5_0000459g0080	Nitab4.5_0000319g0050	Nitab4.5_0000201g0250	Nitab4.5_0000223g0300
	Nitab4.5_0006272g0010	BZip transcription factor IPR011616 bZIP transcription factor, bZIP-1	9.76753	0.808367	0.491619	-0.546443	-1.46446	-2.15312	0.27333					Nitab4.5_0000116g0180	Nitab4.5_0000470g0230	Nitab4.5_0000462g0040	Nitab4.5_0000319g0220	Nitab4.5_0000202g0460	Nitab4.5_0000223g0340
	Nitab4.5_0001397g0020	BZIP transcription factor family protein IPR011616 bZIP transcription factor, bZIP-1	0.938171	-0.950579	-1.34386	-1.20585	-2.07372	-13.1958	-0.988657					Nitab4.5_0000116g0330	Nitab4.5_0000488g0010	Nitab4.5_0000463g0020	Nitab4.5_0000321g0130	Nitab4.5_0000203g0140	Nitab4.5_0000227g0140
	Nitab4.5_0005096g0020	BZIP transcription factor IPR011616 bZIP transcription factor, bZIP-1	38.7579	-0.818606	-0.889709	-0.409756	-0.820554	-1.2775	-0.310079					Nitab4.5_0000118g0060	Nitab4.5_0000488g0030	Nitab4.5_0000468g0030	Nitab4.5_0000321g0280	Nitab4.5_0000203g0150	Nitab4.5_0000227g0160
	Nitab4.5_0006996g0040	BZIP transcription factor IPR011616 bZIP transcription factor, bZIP-1	9.86609	-0.820441	-0.914825	0.144694	-0.39557	-1.15073	0.593359					Nitab4.5_0000118g0080	Nitab4.5_0000492g0070	Nitab4.5_0000470g0190	Nitab4.5_0000322g0110	Nitab4.5_0000206g0060	Nitab4.5_0000231g0240
	Nitab4.5_0011122g0010	BZip transcription factor IPR011616 bZIP transcription factor, bZIP-1	25.2816	-0.408131	-0.260703	-0.209503	-0.458466	-1.3749	0.0576713					Nitab4.5_0000119g0420	Nitab4.5_0000498g0040	Nitab4.5_0000470g0230	Nitab4.5_0000322g0180	Nitab4.5_0000207g0030	Nitab4.5_0000234g0200
C2C2-CO-like	Nitab4.5_0001982g0010	Tomato CONSTANS-like 1	1.39116	2.83023	1.30497	0.4135	-0.0924849	-1.33515	1.46684					Nitab4.5_0000120g0190	Nitab4.5_0000498g0090	Nitab4.5_0000475g0010	Nitab4.5_0000325g0050	Nitab4.5_0000207g0200	Nitab4.5_0000235g0110
	Nitab4.5_0013739g0010	Tomato CONSTANS-like 1	0.415901	3.02167	0.882216	-1.0345	-2.74572	-2.93634	0.721915					Nitab4.5_0000121g0170	Nitab4.5_0000502g0160	Nitab4.5_0000481g0100	Nitab4.5_0000332g0130	Nitab4.5_0000207g0380	Nitab4.5_0000237g0070
	Nitab4.5_0001110g0140	CONSTANS-like protein IPR010402 CCT domain	19.2008	0.473356	0.106102	-0.166826	-1.01163	-1.35355	-0.206837					Nitab4.5_0000123g0170	Nitab4.5_0000506g0110	Nitab4.5_0000481g0160	Nitab4.5_0000337g0100	Nitab4.5_0000207g0390	Nitab4.5_0000241g0040
	Nitab4.5_0001212g0030	CONSTANS-like protein IPR010402 CCT domain	31.1773	0.12483	-0.193547	-0.107856	-2.52307	-4.08629	0.110064					Nitab4.5_0000125g0360	Nitab4.5_0000512g0230	Nitab4.5_0000482g0170	Nitab4.5_0000338g0230	Nitab4.5_0000209g0010	Nitab4.5_0000244g0010
	Nitab4.5_0001229g0040	CONSTANS-like zinc finger protein IPR010402 CCT domain	0.884745	-0.771316	-1.03295	0.392598	3.27836	4.27065	-0.0766748					Nitab4.5_0000125g0380	Nitab4.5_0000522g0150	Nitab4.5_0000488g0010	Nitab4.5_0000339g0010	Nitab4.5_0000209g0230	Nitab4.5_0000244g0140
	Nitab4.5_0011858g0010	CONSTANS-like zinc finger protein IPR010402 CCT domain	1.51264	-1.02423	-1.02567	-0.0297649	3.71831	4.46413	0.521062					Nitab4.5_0000127g0100	Nitab4.5_0000522g0170	Nitab4.5_0000488g0030	Nitab4.5_0000342g0310	Nitab4.5_0000209g0240	Nitab4.5_0000245g0010
	Nitab4.5_0000824g0040	CONSTANS-like zinc finger protein IPR010402 CCT domain	15.8334	0.396873	-0.0405912	-0.0896119	0.824282	1.28227	-0.353237					Nitab4.5_0000129g0310	Nitab4.5_0000527g0090	Nitab4.5_0000497g0200	Nitab4.5_0000343g0060	Nitab4.5_0000209g0260	Nitab4.5_0000246g0130
	Nitab4.5_0004941g0040	CONSTANS-like zinc finger protein IPR010402 CCT domain	3.0259	-0.596153	-0.251865	-0.135608	0.326984	1.3765	-0.516798					Nitab4.5_0000130g0060	Nitab4.5_0000527g0200	Nitab4.5_0000498g0190	Nitab4.5_0000345g0080	Nitab4.5_0000209g0270	Nitab4.5_0000252g0270
C2C2-Dof	Nitab4.5_0000040g0250	Dof zinc finger protein IPR003851 Zinc finger, Dof-type	2.33962	2.44705	1.73275	-0.0108868	-2.02721	-3.7458	1.09448					Nitab4.5_0000130g0380	Nitab4.5_0000539g0020	Nitab4.5_0000500g0100	Nitab4.5_0000349g0060	Nitab4.5_0000213g0030	Nitab4.5_0000254g0050
	Nitab4.5_0000274g0250	Dof zinc finger protein IPR003851 Zinc finger, Dof-type	3.4689	1.81965	1.33061	-0.443133	-2.21464	-3.06147	1.43665					Nitab4.5_0000132g0050	Nitab4.5_0000549g0050	Nitab4.5_0000505g0110	Nitab4.5_0000354g0040	Nitab4.5_0000215g0010	Nitab4.5_0000270g0270
	Nitab4.5_0000533g0150	Dof zinc finger protein 9 IPR003851 Zinc finger, Dof-type	13.2911	1.02522	-0.370582	-0.476679	-0.902446	-0.278212	-0.402265					Nitab4.5_0000132g0110	Nitab4.5_0000550g0010	Nitab4.5_0000506g0110	Nitab4.5_0000354g0180	Nitab4.5_0000215g0040	Nitab4.5_0000274g0250
	Nitab4.5_0000888g0140	Dof zinc finger protein 9 IPR003851 Zinc finger, Dof-type	10.7686	1.08596	0.238035	-0.211852	-0.261671	0.145901	-0.0877873					Nitab4.5_0000132g0500	Nitab4.5_0000552g0060	Nitab4.5_0000525g0290	Nitab4.5_0000356g0010	Nitab4.5_0000217g0100	Nitab4.5_0000278g0010
	Nitab4.5_0001014g0060	Dof zinc finger protein IPR003851 Zinc finger, Dof-type	9.47529	1.32288	0.490318	-0.0642508	-0.0454429	0.557507	0.431311					Nitab4.5_0000136g0200	Nitab4.5_0000555g0150	Nitab4.5_0000541g0100	Nitab4.5_0000359g0070	Nitab4.5_0000218g0060	Nitab4.5_0000278g0030
	Nitab4.5_0003063g0040	Dof zinc finger protein 6 IPR003851 Zinc finger, Dof-type	7.34506	1.42129	0.951664	-0.255646	-0.583131	-1.1912	-0.78133					Nitab4.5_0000136g0270	Nitab4.5_0000566g0180	Nitab4.5_0000556g0240	Nitab4.5_0000360g0100	Nitab4.5_0000218g0070	Nitab4.5_0000278g0040
	Nitab4.5_0003995g0040	Dof zinc finger protein IPR003851 Zinc finger, Dof-type	2.91847	1.41903	1.3445	-0.111214	-0.891973	-1.54586	0.727692					Nitab4.5_0000137g0240	Nitab4.5_0000566g0280	Nitab4.5_0000562g0110	Nitab4.5_0000363g0010	Nitab4.5_0000218g0110	Nitab4.5_0000279g0060
	Nitab4.5_0004286g0050	Dof zinc finger protein IPR003851 Zinc finger, Dof-type	6.8834	1.72083	1.00008	-0.0891945	-2.83751	-4.14239	1.13983					Nitab4.5_0000139g0010	Nitab4.5_0000570g0190	Nitab4.5_0000563g0290	Nitab4.5_0000373g0030	Nitab4.5_0000222g0170	Nitab4.5_0000284g0090
	Nitab4.5_0004875g0010	Dof zinc finger protein 9 IPR003851 Zinc finger, Dof-type	12.6029	1.14397	-0.0399667	0.0635543	-0.265179	-0.226158	-0.214747					Nitab4.5_0000141g0040	Nitab4.5_0000573g0100	Nitab4.5_0000565g0130	Nitab4.5_0000374g0140	Nitab4.5_0000227g0160	Nitab4.5_0000286g0060
	Nitab4.5_0007189g0040	Dof zinc finger protein IPR003851 Zinc finger, Dof-type	7.05803	1.36705	0.797483	0.107089	-1.68693	-3.27276	1.53565					Nitab4.5_0000141g0350	Nitab4.5_0000574g0090	Nitab4.5_0000573g0060	Nitab4.5_0000376g0160	Nitab4.5_0000231g0350	Nitab4.5_0000286g0070
	Nitab4.5_0007740g0010	Dof zinc finger protein IPR003851 Zinc finger, Dof-type	0.576492	1.96081	1.92541	0.16539	-2.35979	-1.77245	2.00433					Nitab4.5_0000142g0440	Nitab4.5_0000574g0130	Nitab4.5_0000573g0100	Nitab4.5_0000381g0130	Nitab4.5_0000231g0490	Nitab4.5_0000286g0080
	Nitab4.5_0002863g0040	Dof zinc finger protein 6 IPR003851 Zinc finger, Dof-type	15.6759	0.365918	-1.0803	-0.14201	-0.107838	-0.658485	-0.248393					Nitab4.5_0000143g0090	Nitab4.5_0000588g0280	Nitab4.5_0000574g0090	Nitab4.5_0000383g0190	Nitab4.5_0000232g0110	Nitab4.5_0000287g0240
	Nitab4.5_0005816g0010	Dof zinc finger protein 4 IPR003851 Zinc finger, Dof-type	10.7762	0.224988	-0.319656	-1.08415	-0.673597	-0.696722	-1.07728					Nitab4.5_0000143g0160	Nitab4.5_0000597g0020	Nitab4.5_0000574g0170	Nitab4.5_0000383g0350	Nitab4.5_0000233g0210	Nitab4.5_0000287g0290
	Nitab4.5_0011320g0010	Dof zinc finger protein IPR003851 Zinc finger, Dof-type	37.7616	0.410595	0.104623	-0.430795	-1.27972	-1.75163	-0.118011					Nitab4.5_0000145g0180	Nitab4.5_0000604g0110	Nitab4.5_0000574g0200	Nitab4.5_0000386g0050	Nitab4.5_0000235g0110	Nitab4.5_0000288g0110
	Nitab4.5_0000108g0290	Dof zinc finger protein IPR003851 Zinc finger, Dof-type	4.33163	0.740745	0.643206	0.229565	0.470756	1.29265	0.724586					Nitab4.5_0000152g0170	Nitab4.5_0000610g0280	Nitab4.5_0000584g0040	Nitab4.5_0000387g0060	Nitab4.5_0000237g0070	Nitab4.5_0000295g0020
	Nitab4.5_0000121g0140	Dof zinc finger protein IPR003851 Zinc finger, Dof-type	11.1458	-0.12539	-0.965026	-0.516457	-0.847097	-1.66623	-0.0111834					Nitab4.5_0000152g0280	Nitab4.5_0000610g0290	Nitab4.5_0000585g0030	Nitab4.5_0000390g0030	Nitab4.5_0000240g0050	Nitab4.5_0000295g0170
	Nitab4.5_0001128g0070	Dof zinc finger protein IPR003851 Zinc finger, Dof-type	40.9182	-0.0458972	-0.188723	-0.320758	-0.624693	-1.45137	0.0464509					Nitab4.5_0000152g0420	Nitab4.5_0000613g0190	Nitab4.5_0000598g0020	Nitab4.5_0000397g0010	Nitab4.5_0000244g0130	Nitab4.5_0000296g0140
C2C2-GATA	Nitab4.5_0000882g0030	GATA transcription factor 9 IPR016679 Transcription factor, GATA, plant	0.468823	-0.194211	0.884484	2.4357	1.13042	0.375612	1.00684					Nitab4.5_0000153g0190	Nitab4.5_0000618g0070	Nitab4.5_0000602g0070	Nitab4.5_0000400g0090	Nitab4.5_0000244g0140	Nitab4.5_0000303g0090
	Nitab4.5_0003117g0060	GATA transcription factor 9 IPR016679 Transcription factor, GATA, plant	0.911121	-0.578618	-0.0945202	1.91707	1.35196	-0.0802517	1.09869					Nitab4.5_0000154g0300	Nitab4.5_0000620g0230	Nitab4.5_0000604g0110	Nitab4.5_0000402g0040	Nitab4.5_0000244g0260	Nitab4.5_0000305g0330
	Nitab4.5_0004198g0010	GATA transcription factor 9 IPR016679 Transcription factor, GATA, plant	0.70809	-0.125565	0.491975	1.78375	1.40245	-0.102604	1.169					Nitab4.5_0000154g0310	Nitab4.5_0000633g0030	Nitab4.5_0000614g0070	Nitab4.5_0000402g0160	Nitab4.5_0000244g0280	Nitab4.5_0000305g0340
	Nitab4.5_0000071g0010	GATA transcription factor 1 IPR016679 Transcription factor, GATA, plant	9.6755	0.630996	0.803942	0.571301	1.12869	0.620854	0.131819					Nitab4.5_0000155g0090	Nitab4.5_0000638g0040	Nitab4.5_0000614g0090	Nitab4.5_0000402g0200	Nitab4.5_0000245g0060	Nitab4.5_0000306g0340
	Nitab4.5_0002304g0070	GATA transcription factor 9 IPR016679 Transcription factor, GATA, plant	16.2471	0.195427	-0.217421	-0.680105	-0.570938	0.0776854	-1.46121					Nitab4.5_0000156g0150	Nitab4.5_0000640g0170	Nitab4.5_0000620g0120	Nitab4.5_0000402g0260	Nitab4.5_0000246g0130	Nitab4.5_0000308g0220
C2H2	Nitab4.5_0001208g0090	Transcription elongation factor 1 homolog IPR007808 Protein of unknown function DUF701, zinc-binding putative	14.4969	-2.39671	-1.98121	-1.75957	-1.35773	-1.65567	-2.59652					Nitab4.5_0000157g0160	Nitab4.5_0000646g0130	Nitab4.5_0000622g0010	Nitab4.5_0000403g0130	Nitab4.5_0000246g0290	Nitab4.5_0000308g0310
	Nitab4.5_0005191g0020	Zinc finger family protein IPR007087 Zinc finger, C2H2-type	9.79964	-1.44172	-1.21028	-0.559917	-0.0684752	-0.247464	-0.357687					Nitab4.5_0000158g0100	Nitab4.5_0000649g0170	Nitab4.5_0000631g0070	Nitab4.5_0000406g0050	Nitab4.5_0000252g0270	Nitab4.5_0000308g0330
	Nitab4.5_0005493g0010	Zinc finger protein-like IPR007087 Zinc finger, C2H2-type	1.20845	1.20423	0.373835	-0.0287163	-0.00362555	0.707735	-0.156821					Nitab4.5_0000161g0280	Nitab4.5_0000649g0230	Nitab4.5_0000631g0080	Nitab4.5_0000416g0240	Nitab4.5_0000254g0250	Nitab4.5_0000311g0030
	Nitab4.5_0022126g0010	Zinc finger family protein IPR007087 Zinc finger, C2H2-type	7.57325	-1.27246	-1.06605	0.0529514	0.438877	-0.178911	-0.355395					Nitab4.5_0000163g0340	Nitab4.5_0000651g0050	Nitab4.5_0000631g0090	Nitab4.5_0000418g0010	Nitab4.5_0000255g0110	Nitab4.5_0000312g0130
	Nitab4.5_0008213g0050	UDP-glucose 6-dehydrogenase IPR001732 UDP-glucose_GDP-mannose dehydrogenase, N-terminal	26.1467	0.911237	1.08519	0.902776	0.762684	0.786587	0.10711					Nitab4.5_0000164g0200	Nitab4.5_0000652g0020	Nitab4.5_0000631g0110	Nitab4.5_0000420g0030	Nitab4.5_0000256g0150	Nitab4.5_0000312g0370
	Nitab4.5_0000459g0080	Zinc finger family protein IPR007087 Zinc finger, C2H2-type	0.974465	0.00169326	-0.327376	2.06457	0.34964	0.146758	-1.01296					Nitab4.5_0000165g0090	Nitab4.5_0000652g0050	Nitab4.5_0000634g0140	Nitab4.5_0000425g0010	Nitab4.5_0000256g0170	Nitab4.5_0000316g0050
	Nitab4.5_0010347g0030	AN1-type zinc finger protein 2B IPR000058 Zinc finger, AN1-type	23.2678	-0.141631	-0.398869	-0.860327	-1.03724	-1.25883	-1.27794					Nitab4.5_0000165g0100	Nitab4.5_0000662g0120	Nitab4.5_0000637g0030	Nitab4.5_0000426g0230	Nitab4.5_0000261g0020	Nitab4.5_0000317g0190
	Nitab4.5_0001509g0030	AN1-type zinc finger protein 2B IPR000058 Zinc finger, AN1-type	20.3501	-0.660129	-0.354919	-0.698446	-0.989806	-1.1928	-1.37953					Nitab4.5_0000165g0110	Nitab4.5_0000662g0180	Nitab4.5_0000639g0210	Nitab4.5_0000433g0070	Nitab4.5_0000261g0260	Nitab4.5_0000319g0090
	Nitab4.5_0000569g0020	Zinc-finger protein IPR007087 Zinc finger, C2H2-type	19.5294	0.609507	0.337936	0.490044	0.238874	0.290628	1.10981					Nitab4.5_0000166g0050	Nitab4.5_0000668g0090	Nitab4.5_0000640g0080	Nitab4.5_0000434g0080	Nitab4.5_0000269g0190	Nitab4.5_0000319g0160
	Nitab4.5_0010523g0020	Zinc finger protein 6 IPR007087 Zinc finger, C2H2-type	22.4004	-0.286834	-0.452018	-0.677932	-0.321071	-0.149844	-1.04672					Nitab4.5_0000166g0100	Nitab4.5_0000670g0050	Nitab4.5_0000640g0170	Nitab4.5_0000436g0180	Nitab4.5_0000269g0300	Nitab4.5_0000319g0180
C3H	Nitab4.5_0000227g0160	Splicing factor U2af subunit IPR009145 U2 auxiliary factor small subunit	82.5447	-1.01925	-0.58906	-1.19863	-1.32498	-1.35167	-2.05936					Nitab4.5_0000167g0130	Nitab4.5_0000680g0010	Nitab4.5_0000651g0010	Nitab4.5_0000439g0050	Nitab4.5_0000272g0070	Nitab4.5_0000319g0220
	Nitab4.5_0001453g0100	Splicing factor U2af subunit IPR009145 U2 auxiliary factor small subunit	83.263	-1.25843	-0.799682	-1.34907	-1.11497	-1.41964	-2.28817					Nitab4.5_0000169g0080	Nitab4.5_0000680g0130	Nitab4.5_0000661g0070	Nitab4.5_0000440g0100	Nitab4.5_0000272g0190	Nitab4.5_0000328g0110
	Nitab4.5_0003076g0070	Zinc finger CCCH domain-containing protein 2 IPR000571 Zinc finger, CCCH-type	2.90951	1.39183	0.499553	0.440889	-0.0244214	0.00160892	1.04446					Nitab4.5_0000170g0030	Nitab4.5_0000682g0040	Nitab4.5_0000667g0060	Nitab4.5_0000444g0190	Nitab4.5_0000274g0040	Nitab4.5_0000332g0130
	Nitab4.5_0004011g0020	Zinc finger CCCH domain-containing protein 20 IPR000571 Zinc finger, CCCH-type	13.811	1.1565	-0.0210248	-0.123072	0.240406	-0.416185	0.216926					Nitab4.5_0000170g0180	Nitab4.5_0000687g0110	Nitab4.5_0000671g0160	Nitab4.5_0000445g0130	Nitab4.5_0000274g0250	Nitab4.5_0000337g0100
	Nitab4.5_0011639g0020	Zinc finger protein zfs1 IPR000571 Zinc finger, CCCH-type	2.70702	-1.617	-0.649057	-0.247225	-0.00557896	-1.65288	-0.643511					Nitab4.5_0000170g0400	Nitab4.5_0000704g0080	Nitab4.5_0000677g0200	Nitab4.5_0000446g0010	Nitab4.5_0000278g0010	Nitab4.5_0000338g0230
	Nitab4.5_0000078g0170	Zinc finger protein zfs1 IPR000571 Zinc finger, CCCH-type	4.43422	-1.16822	-1.25586	-0.401422	-0.418787	-1.83645	-0.432704					Nitab4.5_0000171g0010	Nitab4.5_0000713g0070	Nitab4.5_0000679g0050	Nitab4.5_0000446g0040	Nitab4.5_0000278g0040	Nitab4.5_0000338g0250
	Nitab4.5_0003213g0030	Zinc finger protein 36 C3H type-like 1 (Fragment) IPR000571 Zinc finger, CCCH-type	6.14706	0.0940023	0.520836	0.228786	0.315813	-0.0055553	-1.75105					Nitab4.5_0000171g0190	Nitab4.5_0000718g0320	Nitab4.5_0000680g0130	Nitab4.5_0000459g0060	Nitab4.5_0000282g0020	Nitab4.5_0000342g0140
	Nitab4.5_0003886g0100	Zinc finger protein 36 C3H type-like 1 (Fragment) IPR000571 Zinc finger, CCCH-type	5.28182	0.373449	0.534503	0.47614	0.621189	0.101631	-1.66895					Nitab4.5_0000174g0040	Nitab4.5_0000723g0160	Nitab4.5_0000681g0150	Nitab4.5_0000461g0280	Nitab4.5_0000283g0120	Nitab4.5_0000343g0060
	Nitab4.5_0005559g0010	Zinc finger CCCH domain-containing protein 30 IPR002110 Ankyrin	8.34892	-0.0392432	-0.0142412	0.186062	0.116963	-0.101133	1.10653					Nitab4.5_0000175g0070	Nitab4.5_0000723g0230	Nitab4.5_0000694g0110	Nitab4.5_0000461g0310	Nitab4.5_0000283g0200	Nitab4.5_0000345g0080
	Nitab4.5_0007303g0020	Splicing factor U2af subunit IPR009145 U2 auxiliary factor small subunit	44.7574	-0.579345	-0.632307	-0.833365	-0.396331	-0.467324	-1.52086					Nitab4.5_0000175g0100	Nitab4.5_0000728g0130	Nitab4.5_0000698g0020	Nitab4.5_0000462g0040	Nitab4.5_0000284g0090	Nitab4.5_0000347g0090
CCAAT	Nitab4.5_0000082g0020	Nuclear transcription factor Y subunit A-1 IPR001289 CCAAT-binding transcription factor, subunit B	1.57263	2.75366	1.2239	-0.732722	-0.539831	0.00717515	-1.41104					Nitab4.5_0000175g0120	Nitab4.5_0000733g0260	Nitab4.5_0000704g0080	Nitab4.5_0000462g0170	Nitab4.5_0000286g0050	Nitab4.5_0000356g0010
	Nitab4.5_0005476g0020	Nuclear transcription factor Y subunit A-1 IPR001289 CCAAT-binding transcription factor, subunit B	32.5315	1.35467	0.347833	0.171601	0.0512022	0.177356	0.310344					Nitab4.5_0000175g0420	Nitab4.5_0000737g0060	Nitab4.5_0000705g0070	Nitab4.5_0000463g0020	Nitab4.5_0000286g0060	Nitab4.5_0000359g0100
	Nitab4.5_0006039g0010	Nuclear transcription factor Y subunit B-3 IPR003957 Transcription factor, CBFA_NFYB, DNA topoisomerase	9.11228	1.04098	0.242411	0.408442	0.447239	0.0120326	0.314765					Nitab4.5_0000178g0150	Nitab4.5_0000738g0040	Nitab4.5_0000712g0270	Nitab4.5_0000469g0040	Nitab4.5_0000287g0030	Nitab4.5_0000360g0100
	Nitab4.5_0012359g0010	Nuclear transcription factor Y subunit B-3 IPR003957 Transcription factor, CBFA_NFYB, DNA topoisomerase	3.67769	1.63581	0.0217804	0.158825	0.816601	0.3822	0.721762					Nitab4.5_0000178g0330	Nitab4.5_0000738g0080	Nitab4.5_0000712g0280	Nitab4.5_0000470g0190	Nitab4.5_0000287g0270	Nitab4.5_0000361g0050
	Nitab4.5_0013475g0010	Nuclear transcription factor Y subunit B-3 IPR003957 Transcription factor, CBFA_NFYB, DNA topoisomerase	24.9217	-1.0727	-0.964403	-0.509871	-0.523398	-0.897906	-0.802832					Nitab4.5_0000181g0050	Nitab4.5_0000742g0110	Nitab4.5_0000714g0020	Nitab4.5_0000472g0020	Nitab4.5_0000288g0110	Nitab4.5_0000367g0060
	Nitab4.5_0000461g0280	Nuclear transcription factor Y subunit B-3 IPR003957 Transcription factor, CBFA_NFYB, DNA topoisomerase	33.4654	-0.356679	-1.53797	-0.277525	-1.97284	-2.4099	0.10115					Nitab4.5_0000182g0110	Nitab4.5_0000745g0040	Nitab4.5_0000723g0160	Nitab4.5_0000472g0130	Nitab4.5_0000291g0090	Nitab4.5_0000368g0400
	Nitab4.5_0006508g0040	Nuclear transcription factor Y subunit B-3 IPR003957 Transcription factor, CBFA_NFYB, DNA topoisomerase	31.7197	-0.560065	-1.79283	-0.306312	-2.0499	-2.36349	-0.198543					Nitab4.5_0000183g0030	Nitab4.5_0000745g0170	Nitab4.5_0000728g0070	Nitab4.5_0000481g0010	Nitab4.5_0000296g0110	Nitab4.5_0000373g0030
	Nitab4.5_0001225g0060	Nuclear transcription factor Y subunit A-7 IPR001289 CCAAT-binding transcription factor, subunit B	11.3833	0.774994	0.249818	0.0650883	-0.622841	-1.06563	0.537284					Nitab4.5_0000183g0150	Nitab4.5_0000754g0140	Nitab4.5_0000728g0140	Nitab4.5_0000486g0010	Nitab4.5_0000296g0140	Nitab4.5_0000375g0040
	Nitab4.5_0004032g0040	Nuclear transcription factor Y subunit C-9 IPR003958 Transcription factor CBF_NF-Y_archaeal histone	0	0	0	10.8231	10.2866	11.9955	13.6503					Nitab4.5_0000187g0090	Nitab4.5_0000754g0170	Nitab4.5_0000738g0040	Nitab4.5_0000488g0030	Nitab4.5_0000297g0170	Nitab4.5_0000375g0050
DBP	Nitab4.5_0001751g0070	Serine_threonine phosphatase family protein IPR015655 Protein phosphatase 2C	7.4739	0.418528	0.167303	-0.165009	-0.191254	0.369488	1.20163					Nitab4.5_0000187g0160	Nitab4.5_0000755g0200	Nitab4.5_0000742g0110	Nitab4.5_0000492g0020	Nitab4.5_0000299g0200	Nitab4.5_0000377g0180
EIL	Nitab4.5_0003796g0080	Ethylene insensitive 3 class transcription factor IPR006957 Ethylene insensitive 3	2.26299	1.09625	0.893766	-0.156597	0.14158	0.275431	0.623228					Nitab4.5_0000188g0210	Nitab4.5_0000756g0030	Nitab4.5_0000744g0050	Nitab4.5_0000497g0200	Nitab4.5_0000300g0240	Nitab4.5_0000381g0130
FHA	Nitab4.5_0002016g0120	Zeaxanthin epoxidase, chloroplastic	11.4794	1.06676	0.297629	-0.150707	-0.624525	-1.09986	0.223026					Nitab4.5_0000191g0030	Nitab4.5_0000759g0270	Nitab4.5_0000744g0140	Nitab4.5_0000498g0090	Nitab4.5_0000302g0080	Nitab4.5_0000381g0220
	Nitab4.5_0000159g0160	Forkhead-associated domain-containing protein IPR000253 Forkhead-associated	0.715721	0.185359	0.589368	1.35113	0.401543	0.68707	0.186059					Nitab4.5_0000192g0150	Nitab4.5_0000766g0050	Nitab4.5_0000745g0040	Nitab4.5_0000505g0110	Nitab4.5_0000305g0260	Nitab4.5_0000381g0330
	Nitab4.5_0002440g0040	Zeaxanthin epoxidase, chloroplastic	20.2273	0.223664	-0.295006	-0.28525	-0.516889	-1.04442	-0.0228298					Nitab4.5_0000192g0200	Nitab4.5_0000766g0070	Nitab4.5_0000748g0100	Nitab4.5_0000512g0050	Nitab4.5_0000305g0330	Nitab4.5_0000382g0040
G2-like	Nitab4.5_0000016g0360	MYB-CC type transfactor IPR006447 Myb-like DNA-binding region, SHAQKYF class	7.06186	-1.21332	-0.827546	-0.0510693	-1.19397	-1.06318	-0.292731					Nitab4.5_0000194g0160	Nitab4.5_0000770g0100	Nitab4.5_0000759g0270	Nitab4.5_0000512g0230	Nitab4.5_0000305g0340	Nitab4.5_0000383g0190
	Nitab4.5_0000672g0080	Myb family transcription factor-like IPR006447 Myb-like DNA-binding region, SHAQKYF class	40.7801	-1.21937	-0.149121	-0.044528	0.0451824	-1.28167	-0.390348					Nitab4.5_0000195g0240	Nitab4.5_0000776g0030	Nitab4.5_0000765g0050	Nitab4.5_0000515g0010	Nitab4.5_0000306g0340	Nitab4.5_0000386g0250
	Nitab4.5_0001777g0040	Myb-like DNA-binding domain SHAQKYF class family protein expressed IPR006447 Myb-like DNA-binding region, SHAQKYF class	1.88338	1.36134	0.809784	0.57877	0.43371	1.18162	-0.0462184					Nitab4.5_0000196g0070	Nitab4.5_0000783g0180	Nitab4.5_0000766g0060	Nitab4.5_0000517g0130	Nitab4.5_0000307g0020	Nitab4.5_0000387g0060
	Nitab4.5_0001933g0010	Myb family transcription factor-like IPR006447 Myb-like DNA-binding region, SHAQKYF class	7.99897	-1.23964	-0.902985	-0.933955	-0.59617	-1.07189	-1.34446					Nitab4.5_0000196g0110	Nitab4.5_0000784g0060	Nitab4.5_0000769g0190	Nitab4.5_0000527g0090	Nitab4.5_0000307g0110	Nitab4.5_0000387g0080
	Nitab4.5_0003610g0020	Myb family transcription factor-like IPR006447 Myb-like DNA-binding region, SHAQKYF class	25.4914	-1.50347	-0.780543	-1.12071	-0.48524	-1.15102	-1.57218					Nitab4.5_0000201g0090	Nitab4.5_0000791g0130	Nitab4.5_0000780g0010	Nitab4.5_0000532g0070	Nitab4.5_0000307g0130	Nitab4.5_0000388g0120
	Nitab4.5_0003889g0040	Myb-like DNA-binding domain SHAQKYF class family protein expressed IPR006447 Myb-like DNA-binding region, SHAQKYF class	0.421697	2.44003	0.416683	2.06365	1.64636	1.68994	0.17462					Nitab4.5_0000201g0220	Nitab4.5_0000800g0030	Nitab4.5_0000807g0110	Nitab4.5_0000545g0040	Nitab4.5_0000307g0160	Nitab4.5_0000389g0020
	Nitab4.5_0008336g0010	Myb family transcription factor-like IPR006447 Myb-like DNA-binding region, SHAQKYF class	14.3119	-1.49456	-1.27069	-0.792771	-0.842654	-1.82015	-1.96814					Nitab4.5_0000201g0250	Nitab4.5_0000803g0050	Nitab4.5_0000815g0030	Nitab4.5_0000548g0180	Nitab4.5_0000307g0330	Nitab4.5_0000396g0170
	Nitab4.5_0006916g0030	Transcription factor (Fragment) IPR006447 Myb-like DNA-binding region, SHAQKYF class	2.20491	-0.210954	0.110136	0.241755	1.93696	2.67791	0.814997					Nitab4.5_0000201g0300	Nitab4.5_0000807g0110	Nitab4.5_0000822g0080	Nitab4.5_0000556g0240	Nitab4.5_0000308g0260	Nitab4.5_0000397g0070
	Nitab4.5_0000102g0300	Transcription factor (Fragment) IPR006447 Myb-like DNA-binding region, SHAQKYF class	0.220199	-0.0156357	0.52305	-0.402874	2.98906	4.17544	-0.234705					Nitab4.5_0000202g0460	Nitab4.5_0000812g0090	Nitab4.5_0000826g0130	Nitab4.5_0000559g0230	Nitab4.5_0000308g0310	Nitab4.5_0000400g0050
	Nitab4.5_0001164g0090	Myb family transcription factor-like IPR006447 Myb-like DNA-binding region, SHAQKYF class	18.1182	-0.912864	-0.313358	-0.673304	-0.418505	-1.34751	-1.06807					Nitab4.5_0000203g0030	Nitab4.5_0000820g0050	Nitab4.5_0000831g0030	Nitab4.5_0000562g0100	Nitab4.5_0000308g0330	Nitab4.5_0000400g0140
	Nitab4.5_0006815g0010	Response regulator IPR006447 Myb-like DNA-binding region, SHAQKYF class	0.378718	0.394361	0.942443	0.523432	-4.03784	-3.92429	2.08587					Nitab4.5_0000203g0040	Nitab4.5_0000826g0100	Nitab4.5_0000833g0060	Nitab4.5_0000562g0110	Nitab4.5_0000309g0200	Nitab4.5_0000401g0120
GNAT	Nitab4.5_0000752g0030	Acetyltransferase-like protein IPR000182 GCN5-related N-acetyltransferase	2.75024	2.13136	-0.226204	-0.243656	0.527518	1.43109	0.364973					Nitab4.5_0000203g0150	Nitab4.5_0000826g0130	Nitab4.5_0000839g0060	Nitab4.5_0000564g0190	Nitab4.5_0000310g0170	Nitab4.5_0000402g0040
	Nitab4.5_0001157g0020	Ribosomal-protein-alanine N-acetyltransferase IPR000182 GCN5-related N-acetyltransferase	13.5528	-1.09121	0.108687	-0.815244	-1.76225	-0.910958	-0.457496					Nitab4.5_0000204g0120	Nitab4.5_0000828g0010	Nitab4.5_0000842g0010	Nitab4.5_0000565g0130	Nitab4.5_0000311g0030	Nitab4.5_0000404g0170
	Nitab4.5_0003338g0090	N-acetyltransferase IPR000182 GCN5-related N-acetyltransferase	3.8845	2.32803	-0.827206	-0.461401	-0.428004	-0.126644	-1.23766					Nitab4.5_0000207g0020	Nitab4.5_0000833g0010	Nitab4.5_0000856g0190	Nitab4.5_0000568g0080	Nitab4.5_0000312g0090	Nitab4.5_0000408g0080
	Nitab4.5_0000036g0010	Acetyltransferase-like protein IPR000182 GCN5-related N-acetyltransferase	15.829	-0.662246	-1.18402	0.563122	0.363342	-0.181489	0.983716					Nitab4.5_0000208g0180	Nitab4.5_0000845g0230	Nitab4.5_0000860g0060	Nitab4.5_0000573g0060	Nitab4.5_0000312g0110	Nitab4.5_0000413g0220
	Nitab4.5_0001157g0010	Ribosomal-protein-alanine N-acetyltransferase IPR000182 GCN5-related N-acetyltransferase	29.3374	-0.567765	-0.136749	-1.00152	-0.933244	-1.11889	-0.572013					Nitab4.5_0000208g0310	Nitab4.5_0000851g0020	Nitab4.5_0000862g0040	Nitab4.5_0000573g0100	Nitab4.5_0000312g0130	Nitab4.5_0000415g0070
	Nitab4.5_0000321g0130	Ribosomal-protein-alanine N-acetyltransferase IPR000182 GCN5-related N-acetyltransferase	1.25651	-1.46069	-0.724848	-1.73047	-13.6172	-0.896925	-2.16197					Nitab4.5_0000208g0320	Nitab4.5_0000856g0210	Nitab4.5_0000866g0010	Nitab4.5_0000574g0090	Nitab4.5_0000312g0240	Nitab4.5_0000416g0250
	Nitab4.5_0005767g0010	Acetyltransferase IPR000182 GCN5-related N-acetyltransferase	3.3873	-0.00571367	0.367516	-0.455767	-1.7878	-2.81299	-0.176566					Nitab4.5_0000208g0350	Nitab4.5_0000859g0200	Nitab4.5_0000868g0020	Nitab4.5_0000574g0200	Nitab4.5_0000312g0340	Nitab4.5_0000418g0010
	Nitab4.5_0000406g0070	N-acetyltransferase IPR000182 GCN5-related N-acetyltransferase	145.893	-0.694307	-0.266465	-0.362004	-0.50433	-1.41573	0.266173					Nitab4.5_0000209g0010	Nitab4.5_0000871g0040	Nitab4.5_0000870g0060	Nitab4.5_0000576g0040	Nitab4.5_0000314g0090	Nitab4.5_0000420g0030
	Nitab4.5_0001417g0050	Amino-acid N-acetyltransferase IPR000182 GCN5-related N-acetyltransferase	14.662	-0.283014	0.107916	0.64182	0.1968	1.41956	0.468906					Nitab4.5_0000209g0210	Nitab4.5_0000872g0040	Nitab4.5_0000871g0040	Nitab4.5_0000578g0170	Nitab4.5_0000314g0100	Nitab4.5_0000421g0110
	Nitab4.5_0007737g0010	N-acetyltransferase IPR000182 GCN5-related N-acetyltransferase	100.949	-0.216016	0.0920025	-0.414137	-0.411897	-1.2005	-0.266791					Nitab4.5_0000209g0230	Nitab4.5_0000876g0130	Nitab4.5_0000871g0060	Nitab4.5_0000578g0200	Nitab4.5_0000316g0050	Nitab4.5_0000424g0010
	Nitab4.5_0001925g0260	Gcn5-related n-acetyltransferase family protein IPR000182 GCN5-related N-acetyltransferase	13.5542	-0.949565	-0.8986	-0.651465	-0.613657	-0.94561	-1.01324					Nitab4.5_0000212g0250	Nitab4.5_0000876g0140	Nitab4.5_0000876g0040	Nitab4.5_0000584g0040	Nitab4.5_0000316g0090	Nitab4.5_0000425g0210
GRAS	Nitab4.5_0000029g0260	GRAS family transcription factor IPR005202 GRAS transcription factor	1.31848	1.20208	-0.0190148	0.192443	0.51671	0.363686	-0.408301					Nitab4.5_0000213g0030	Nitab4.5_0000881g0110	Nitab4.5_0000876g0130	Nitab4.5_0000585g0120	Nitab4.5_0000318g0220	Nitab4.5_0000426g0200
	Nitab4.5_0000092g0120	GRAS family transcription factor IPR005202 GRAS transcription factor	12.6777	1.04376	0.234259	-0.0507524	-0.139628	-0.291046	-0.080929					Nitab4.5_0000213g0170	Nitab4.5_0000895g0070	Nitab4.5_0000876g0140	Nitab4.5_0000586g0140	Nitab4.5_0000318g0230	Nitab4.5_0000430g0040
	Nitab4.5_0000552g0060	GRAS family transcription factor IPR005202 GRAS transcription factor	6.25333	1.34253	1.75988	-0.0532507	0.332927	0.485676	0.544505					Nitab4.5_0000214g0020	Nitab4.5_0000900g0050	Nitab4.5_0000881g0110	Nitab4.5_0000588g0340	Nitab4.5_0000319g0090	Nitab4.5_0000430g0050
	Nitab4.5_0002499g0080	GRAS family transcription factor IPR005202 GRAS transcription factor	31.8862	-1.17346	-0.758571	-0.308689	-0.214321	-0.325328	-0.633536					Nitab4.5_0000214g0080	Nitab4.5_0000900g0150	Nitab4.5_0000882g0030	Nitab4.5_0000593g0240	Nitab4.5_0000319g0160	Nitab4.5_0000433g0070
	Nitab4.5_0002715g0060	GRAS family transcription factor IPR005202 GRAS transcription factor	17.9245	1.4982	1.44852	-0.533272	0.0342938	-0.132626	-0.453697					Nitab4.5_0000215g0010	Nitab4.5_0000926g0120	Nitab4.5_0000883g0020	Nitab4.5_0000597g0020	Nitab4.5_0000319g0220	Nitab4.5_0000435g0080
	Nitab4.5_0004422g0030	GRAS family transcription factor IPR005202 GRAS transcription factor	2.3722	-2.14228	-1.7753	0.554954	1.04372	0.545645	0.370994					Nitab4.5_0000217g0100	Nitab4.5_0000946g0010	Nitab4.5_0000900g0090	Nitab4.5_0000601g0130	Nitab4.5_0000321g0280	Nitab4.5_0000436g0180
	Nitab4.5_0004679g0020	GAI-like protein 1 (Fragment) IPR005202 GRAS transcription factor	6.72787	-1.05848	-0.609428	-0.515727	-0.275417	0.16149	-0.163317					Nitab4.5_0000219g0010	Nitab4.5_0000965g0070	Nitab4.5_0000900g0150	Nitab4.5_0000604g0110	Nitab4.5_0000322g0180	Nitab4.5_0000442g0190
	Nitab4.5_0009190g0010	GRAS family transcription factor IPR005202 GRAS transcription factor	6.91944	-1.54412	-1.25871	0.572674	-0.082309	-1.54682	1.0308					Nitab4.5_0000221g0040	Nitab4.5_0000977g0030	Nitab4.5_0000902g0090	Nitab4.5_0000610g0020	Nitab4.5_0000325g0050	Nitab4.5_0000450g0070
	Nitab4.5_0010796g0010	GRAS family transcription factor (Fragment) IPR005202 GRAS transcription factor	4.74761	-0.794194	-2.01511	-0.390332	-0.8007	-0.552501	0.293829					Nitab4.5_0000222g0180	Nitab4.5_0000977g0070	Nitab4.5_0000902g0170	Nitab4.5_0000618g0010	Nitab4.5_0000328g0130	Nitab4.5_0000457g0220
	Nitab4.5_0000368g0350	GRAS family transcription factor IPR005202 GRAS transcription factor	15.0191	0.916142	0.899862	-1.00548	-0.283982	-0.197999	-0.304753					Nitab4.5_0000222g0200	Nitab4.5_0000980g0350	Nitab4.5_0000902g0190	Nitab4.5_0000622g0070	Nitab4.5_0000330g0040	Nitab4.5_0000459g0060
	Nitab4.5_0000193g0120	GRAS family transcription factor IPR005202 GRAS transcription factor	18.1038	-0.686122	-0.622006	0.594253	-0.273807	-1.61351	0.698844					Nitab4.5_0000222g0350	Nitab4.5_0000986g0060	Nitab4.5_0000902g0260	Nitab4.5_0000622g0140	Nitab4.5_0000330g0050	Nitab4.5_0000461g0240
	Nitab4.5_0024705g0010	GRAS family transcription factor IPR005202 GRAS transcription factor	1.65011	0.412319	0.610301	1.03024	1.15253	1.42306	0.242927					Nitab4.5_0000225g0010	Nitab4.5_0000987g0050	Nitab4.5_0000905g0130	Nitab4.5_0000625g0080	Nitab4.5_0000332g0110	Nitab4.5_0000462g0080
	Nitab4.5_0000159g0150	GRAS family transcription factor (Fragment) IPR005202 GRAS transcription factor	0.855802	-0.915316	-1.48768	0.422815	-0.058419	-0.0656158	1.45739					Nitab4.5_0000227g0050	Nitab4.5_0000993g0080	Nitab4.5_0000907g0090	Nitab4.5_0000625g0100	Nitab4.5_0000335g0110	Nitab4.5_0000462g0090
	Nitab4.5_0001134g0090	GRAS family transcription factor IPR005202 GRAS transcription factor	6.79704	0.252129	-0.311268	0.024279	-0.0610984	0.142741	1.2728					Nitab4.5_0000227g0160	Nitab4.5_0001002g0070	Nitab4.5_0000914g0300	Nitab4.5_0000628g0110	Nitab4.5_0000337g0020	Nitab4.5_0000462g0110
	Nitab4.5_0006699g0010	GRAS family transcription factor IPR005202 GRAS transcription factor	0.866276	-1.32246	-1.09903	0.905911	0.747014	0.42602	2.36696					Nitab4.5_0000227g0180	Nitab4.5_0001013g0090	Nitab4.5_0000928g0090	Nitab4.5_0000628g0180	Nitab4.5_0000337g0100	Nitab4.5_0000463g0020
	Nitab4.5_0007255g0040	GRAS family transcription factor IPR005202 GRAS transcription factor	1.87045	0.970378	-0.701632	0.466008	0.189615	0.656142	1.31048					Nitab4.5_0000231g0240	Nitab4.5_0001028g0130	Nitab4.5_0000932g0020	Nitab4.5_0000631g0110	Nitab4.5_0000338g0230	Nitab4.5_0000470g0150
GRF	Nitab4.5_0001494g0010	Growth regulating factor 1 (Fragment) IPR014977 WRC	5.87162	1.11923	-0.114508	0.549793	0.395361	0.403113	0.764352					Nitab4.5_0000231g0310	Nitab4.5_0001028g0150	Nitab4.5_0000933g0020	Nitab4.5_0000634g0140	Nitab4.5_0000339g0010	Nitab4.5_0000476g0240
HB	Nitab4.5_0000015g0100	Homeobox leucine zipper protein IPR001356 Homeobox	4.09493	-3.38915	-2.60174	-0.647895	0.39169	-0.381	0.124213					Nitab4.5_0000232g0150	Nitab4.5_0001036g0070	Nitab4.5_0000933g0030	Nitab4.5_0000636g0130	Nitab4.5_0000340g0090	Nitab4.5_0000481g0010
	Nitab4.5_0000274g0090	Homeobox-leucine zipper-like protein IPR001356 Homeobox	0.720952	2.24691	1.39355	2.08799	1.08942	0.6541	1.5691					Nitab4.5_0000232g0160	Nitab4.5_0001048g0050	Nitab4.5_0000956g0120	Nitab4.5_0000637g0030	Nitab4.5_0000345g0080	Nitab4.5_0000492g0020
	Nitab4.5_0000319g0290	Homeobox leucine zipper protein IPR001356 Homeobox	3.93735	1.84322	1.03488	-0.722401	0.0974601	-0.20922	0.886911					Nitab4.5_0000234g0100	Nitab4.5_0001068g0010	Nitab4.5_0000957g0120	Nitab4.5_0000640g0140	Nitab4.5_0000347g0090	Nitab4.5_0000495g0020
	Nitab4.5_0000380g0050	BEL1-like homeodomain protein 1 IPR001356 Homeobox IPR017970 Homeobox, conserved site	5.22663	1.84835	1.08678	-0.0313258	0.569794	0.430641	0.369416					Nitab4.5_0000234g0210	Nitab4.5_0001076g0030	Nitab4.5_0000957g0170	Nitab4.5_0000640g0150	Nitab4.5_0000349g0060	Nitab4.5_0000495g0070
	Nitab4.5_0000460g0100	Homeobox-leucine zipper-like protein IPR001356 Homeobox	2.55297	2.08441	2.42881	1.44822	1.29827	0.784196	0.461232					Nitab4.5_0000235g0110	Nitab4.5_0001084g0050	Nitab4.5_0000970g0040	Nitab4.5_0000640g0170	Nitab4.5_0000351g0170	Nitab4.5_0000496g0160
	Nitab4.5_0000628g0070	Homeobox-leucine zipper-like protein IPR001356 Homeobox	1.32503	1.49911	0.512157	0.322707	0.0109418	-0.564096	0.641078					Nitab4.5_0000235g0130	Nitab4.5_0001088g0170	Nitab4.5_0000977g0030	Nitab4.5_0000641g0050	Nitab4.5_0000354g0180	Nitab4.5_0000498g0150
	Nitab4.5_0000679g0080	Homeobox-leucine zipper-like protein IPR001356 Homeobox	20.0138	1.16156	0.0632977	-0.564393	-0.752344	0.0775973	-0.0389					Nitab4.5_0000236g0010	Nitab4.5_0001091g0010	Nitab4.5_0000978g0100	Nitab4.5_0000647g0190	Nitab4.5_0000359g0100	Nitab4.5_0000500g0100
	Nitab4.5_0000710g0010	Homeobox-leucine zipper protein IPR001356 Homeobox	1.78392	1.92775	0.883579	0.275123	-0.0176614	0.131929	1.5228					Nitab4.5_0000240g0050	Nitab4.5_0001091g0070	Nitab4.5_0000993g0100	Nitab4.5_0000649g0170	Nitab4.5_0000363g0010	Nitab4.5_0000500g0210
	Nitab4.5_0001614g0180	Knotted-like homeobox protein IPR005541 KNOX2	49.3959	1.06381	0.999724	0.63514	0.294424	0.524906	0.149084					Nitab4.5_0000241g0220	Nitab4.5_0001091g0110	Nitab4.5_0000994g0050	Nitab4.5_0000651g0010	Nitab4.5_0000368g0200	Nitab4.5_0000502g0090
	Nitab4.5_0002437g0020	BEL1-like homeodomain protein 1 IPR001356 Homeobox IPR017970 Homeobox, conserved site	1.67217	1.62373	1.04203	-0.254276	0.218019	-0.57837	-0.156412					Nitab4.5_0000241g0260	Nitab4.5_0001110g0030	Nitab4.5_0001000g0100	Nitab4.5_0000651g0020	Nitab4.5_0000368g0310	Nitab4.5_0000505g0110
	Nitab4.5_0002804g0010	Homeobox-leucine zipper protein IPR001356 Homeobox	8.8676	1.83986	0.0641567	0.690038	0.185532	0.322324	1.14332					Nitab4.5_0000244g0100	Nitab4.5_0001111g0050	Nitab4.5_0001006g0030	Nitab4.5_0000652g0020	Nitab4.5_0000370g0050	Nitab4.5_0000510g0010
	Nitab4.5_0004251g0010	Homeobox leucine zipper protein IPR001356 Homeobox	0.549966	3.49978	0.314423	-2.12927	-0.308276	2.27622	-1.1166					Nitab4.5_0000244g0260	Nitab4.5_0001117g0060	Nitab4.5_0001013g0090	Nitab4.5_0000662g0180	Nitab4.5_0000373g0030	Nitab4.5_0000515g0010
	Nitab4.5_0004605g0080	Homeobox-leucine zipper-like protein IPR001356 Homeobox IPR017970 Homeobox, conserved site	35.3024	1.41659	0.393305	0.132173	-0.624234	-0.549349	0.82465					Nitab4.5_0000245g0010	Nitab4.5_0001143g0060	Nitab4.5_0001019g0060	Nitab4.5_0000663g0130	Nitab4.5_0000375g0320	Nitab4.5_0000515g0090
	Nitab4.5_0004955g0020	Homeobox leucine zipper protein IPR001356 Homeobox	7.95847	2.97112	1.28637	-0.303605	-1.07778	-0.100378	0.75362					Nitab4.5_0000246g0060	Nitab4.5_0001145g0040	Nitab4.5_0001022g0030	Nitab4.5_0000671g0160	Nitab4.5_0000376g0160	Nitab4.5_0000527g0200
	Nitab4.5_0005726g0010	Knotted-like homeobox protein IPR005541 KNOX2	18.7808	1.54201	1.31065	1.01497	0.980611	0.848772	0.279362					Nitab4.5_0000246g0130	Nitab4.5_0001146g0080	Nitab4.5_0001026g0060	Nitab4.5_0000677g0100	Nitab4.5_0000377g0210	Nitab4.5_0000527g0230
	Nitab4.5_0006628g0020	BEL1-like homeodomain protein 8 IPR006563 POX	3.45247	1.51987	1.06927	0.669633	0.492827	0.504148	0.149192					Nitab4.5_0000247g0020	Nitab4.5_0001157g0040	Nitab4.5_0001031g0010	Nitab4.5_0000680g0050	Nitab4.5_0000381g0130	Nitab4.5_0000532g0070
	Nitab4.5_0007001g0020	Homeobox leucine zipper protein IPR001356 Homeobox	1.92685	3.21689	-0.297026	-1.72296	-1.59095	1.12756	-0.977527					Nitab4.5_0000249g0080	Nitab4.5_0001158g0100	Nitab4.5_0001048g0050	Nitab4.5_0000680g0150	Nitab4.5_0000383g0180	Nitab4.5_0000535g0130
	Nitab4.5_0007217g0030	Homeobox-leucine zipper protein ATHB-15 IPR002913 Lipid-binding START	2.67874	1.15473	0.589662	1.10254	0.545982	0.499967	0.285371					Nitab4.5_0000252g0010	Nitab4.5_0001167g0080	Nitab4.5_0001051g0060	Nitab4.5_0000681g0080	Nitab4.5_0000386g0050	Nitab4.5_0000536g0010
	Nitab4.5_0007233g0010	Homeobox-leucine zipper protein 22 IPR003106 Leucine zipper, homeobox-associated	60.1644	1.4481	0.748465	-0.371776	-0.377214	-0.383942	0.444506					Nitab4.5_0000252g0030	Nitab4.5_0001175g0140	Nitab4.5_0001051g0160	Nitab4.5_0000681g0150	Nitab4.5_0000386g0240	Nitab4.5_0000548g0010
	Nitab4.5_0007283g0060	Homeobox-leucine zipper protein IPR006712 HD-ZIP protein, N-terminal	8.2929	1.35166	0.582043	0.41443	0.919779	0.473803	0.152995					Nitab4.5_0000252g0040	Nitab4.5_0001180g0150	Nitab4.5_0001056g0020	Nitab4.5_0000688g0170	Nitab4.5_0000387g0060	Nitab4.5_0000551g0010
	Nitab4.5_0011605g0010	Homeobox-leucine zipper-like protein IPR001356 Homeobox	3.50141	2.5595	1.74237	0.711049	0.918984	0.397847	0.16909					Nitab4.5_0000252g0160	Nitab4.5_0001181g0050	Nitab4.5_0001067g0050	Nitab4.5_0000690g0010	Nitab4.5_0000387g0080	Nitab4.5_0000555g0150
	Nitab4.5_0004744g0010	BEL1-like homeodomain protein 9 IPR001356 Homeobox	3.35393	0.925125	0.514183	1.02024	1.01411	0.891196	0.0686481					Nitab4.5_0000252g0240	Nitab4.5_0001204g0100	Nitab4.5_0001068g0040	Nitab4.5_0000694g0020	Nitab4.5_0000389g0070	Nitab4.5_0000556g0240
	Nitab4.5_0000564g0190	Homeobox-leucine zipper-like protein IPR001356 Homeobox	9.00893	-0.05281	0.543872	0.526669	1.00774	0.762905	0.627619					Nitab4.5_0000252g0270	Nitab4.5_0001208g0090	Nitab4.5_0001088g0200	Nitab4.5_0000697g0070	Nitab4.5_0000390g0020	Nitab4.5_0000557g0050
	Nitab4.5_0003577g0040	Homeobox-leucine zipper-like protein IPR001356 Homeobox IPR017970 Homeobox, conserved site	55.2874	-0.440841	-0.296754	-0.237522	-0.767654	-1.08148	-0.283838					Nitab4.5_0000254g0020	Nitab4.5_0001214g0030	Nitab4.5_0001094g0130	Nitab4.5_0000705g0010	Nitab4.5_0000390g0030	Nitab4.5_0000558g0010
HRT	Nitab4.5_0004087g0010	Transcripteion factor (Fragment)	21.6764	-1.15082	-0.541205	-0.819721	-0.699668	-0.791523	-1.14828					Nitab4.5_0000254g0050	Nitab4.5_0001216g0060	Nitab4.5_0001096g0030	Nitab4.5_0000705g0070	Nitab4.5_0000396g0170	Nitab4.5_0000559g0220
HSF	Nitab4.5_0000459g0060	Heat stress transcription factor A3-type, DNA-binding	145.302	-1.93558	-0.546051	-1.36731	-3.33143	-5.05985	-3.51917					Nitab4.5_0000255g0110	Nitab4.5_0001225g0250	Nitab4.5_0001097g0100	Nitab4.5_0000705g0110	Nitab4.5_0000396g0230	Nitab4.5_0000562g0100
	Nitab4.5_0001519g0010	Heat stress transcription factor A3-type, DNA-binding	1.51504	3.23941	1.03386	0.0966347	-0.0827753	-0.0780897	0.554953					Nitab4.5_0000255g0150	Nitab4.5_0001237g0040	Nitab4.5_0001099g0050	Nitab4.5_0000706g0050	Nitab4.5_0000400g0050	Nitab4.5_0000563g0180
	Nitab4.5_0002904g0100	Heat stress transcription factor A3-type, DNA-binding	12.8203	2.47064	0.444368	0.20108	1.04965	1.91104	1.25526					Nitab4.5_0000256g0160	Nitab4.5_0001248g0010	Nitab4.5_0001105g0210	Nitab4.5_0000712g0270	Nitab4.5_0000400g0140	Nitab4.5_0000565g0060
	Nitab4.5_0004441g0010	Heat stress transcription factor A3-type, DNA-binding	15.7055	-3.30893	-0.553142	-1.55859	-3.35394	-5.22484	-4.55709					Nitab4.5_0000256g0170	Nitab4.5_0001256g0060	Nitab4.5_0001111g0050	Nitab4.5_0000713g0070	Nitab4.5_0000402g0010	Nitab4.5_0000565g0130
	Nitab4.5_0005259g0020	Heat stress transcription factor A3-type, DNA-binding	5.32526	1.73353	1.70317	-0.364588	0.0232441	-0.22426	-0.172129					Nitab4.5_0000256g0190	Nitab4.5_0001270g0120	Nitab4.5_0001116g0030	Nitab4.5_0000718g0310	Nitab4.5_0000402g0040	Nitab4.5_0000565g0270
	Nitab4.5_0005947g0030	Heat stress transcription factor A3-type, DNA-binding	15.1422	2.50813	0.315858	-0.680622	0.316458	1.16784	0.697998					Nitab4.5_0000256g0270	Nitab4.5_0001274g0010	Nitab4.5_0001117g0070	Nitab4.5_0000722g0020	Nitab4.5_0000402g0160	Nitab4.5_0000569g0020
	Nitab4.5_0006360g0010	Heat stress transcription factor A3-type, DNA-binding	9.60195	-1.03548	-1.2179	-0.522473	0.391672	-0.216178	-0.576969					Nitab4.5_0000259g0180	Nitab4.5_0001280g0010	Nitab4.5_0001119g0040	Nitab4.5_0000728g0130	Nitab4.5_0000402g0180	Nitab4.5_0000573g0100
	Nitab4.5_0006852g0070	Heat stress transcription factor A3-type, DNA-binding	61.5411	-3.3508	-1.10062	-3.10552	-3.38456	-3.82516	-4.861					Nitab4.5_0000261g0270	Nitab4.5_0001288g0190	Nitab4.5_0001128g0120	Nitab4.5_0000733g0180	Nitab4.5_0000402g0260	Nitab4.5_0000574g0090
	Nitab4.5_0002839g0010	Heat stress transcription factor-type, DNA-binding	13.9191	-0.931503	-1.47307	-1.36604	-2.17491	0.711415	-1.1762					Nitab4.5_0000263g0090	Nitab4.5_0001294g0010	Nitab4.5_0001142g0030	Nitab4.5_0000737g0120	Nitab4.5_0000403g0030	Nitab4.5_0000574g0200
	Nitab4.5_0003133g0040	Heat stress transcription factor A3-type, DNA-binding	3.9165	0.954902	1.11982	-0.213055	-0.07122	-0.318078	-0.476619					Nitab4.5_0000263g0190	Nitab4.5_0001294g0030	Nitab4.5_0001146g0080	Nitab4.5_0000738g0040	Nitab4.5_0000403g0080	Nitab4.5_0000580g0250
	Nitab4.5_0004411g0050	Heat stress transcription factor-type, DNA-binding	5.72339	-1.59084	-1.33453	-2.58818	-2.08895	-3.05355	-2.93128					Nitab4.5_0000263g0280	Nitab4.5_0001297g0050	Nitab4.5_0001149g0030	Nitab4.5_0000742g0110	Nitab4.5_0000403g0130	Nitab4.5_0000585g0030
	Nitab4.5_0004564g0010	Heat stress transcription factor-type, DNA-binding	2.56401	-2.32804	-2.74409	-14.6462	-2.84032	-2.78295	-2.28055					Nitab4.5_0000267g0090	Nitab4.5_0001301g0110	Nitab4.5_0001149g0070	Nitab4.5_0000744g0050	Nitab4.5_0000404g0110	Nitab4.5_0000588g0340
	Nitab4.5_0000321g0280	Heat stress transcription factor A3-type, DNA-binding	2.40164	1.14983	0.220971	0.156253	2.30596	2.88269	-0.31514					Nitab4.5_0000269g0160	Nitab4.5_0001307g0030	Nitab4.5_0001157g0010	Nitab4.5_0000744g0140	Nitab4.5_0000404g0170	Nitab4.5_0000593g0080
	Nitab4.5_0000586g0140	Heat stress transcription factor-type, DNA-binding	43.1895	0.510851	0.477721	-0.710046	-1.11355	-0.536154	-0.663267					Nitab4.5_0000269g0190	Nitab4.5_0001349g0130	Nitab4.5_0001159g0030	Nitab4.5_0000754g0140	Nitab4.5_0000406g0050	Nitab4.5_0000593g0240
	Nitab4.5_0005648g0020	Heat stress transcription factor-type, DNA-binding	7.3554	-0.369537	-0.228152	-0.891546	-1.94307	-1.70677	-2.05027					Nitab4.5_0000270g0120	Nitab4.5_0001356g0110	Nitab4.5_0001161g0030	Nitab4.5_0000756g0030	Nitab4.5_0000406g0070	Nitab4.5_0000595g0100
	Nitab4.5_0010472g0010	Heat stress transcription factor-type, DNA-binding	8.38863	0.0525464	-0.0894289	-0.800795	-1.87013	-1.4272	-1.3724					Nitab4.5_0000272g0030	Nitab4.5_0001366g0090	Nitab4.5_0001163g0150	Nitab4.5_0000759g0270	Nitab4.5_0000408g0160	Nitab4.5_0000597g0020
	Nitab4.5_0000716g0250	Heat stress transcription factor-type, DNA-binding	42.6429	-0.00577878	-0.271653	-0.640073	-0.931281	-1.28542	-1.1706					Nitab4.5_0000273g0230	Nitab4.5_0001374g0220	Nitab4.5_0001168g0160	Nitab4.5_0000760g0050	Nitab4.5_0000410g0400	Nitab4.5_0000604g0010
	Nitab4.5_0002158g0140	Heat stress transcription factor-type, DNA-binding	4.8463	-0.690726	-1.40095	-4.32041	-3.81003	-2.93778	-3.70547					Nitab4.5_0000274g0090	Nitab4.5_0001437g0220	Nitab4.5_0001176g0090	Nitab4.5_0000764g0020	Nitab4.5_0000412g0050	Nitab4.5_0000604g0110
	Nitab4.5_0002782g0100	Heat stress transcription factor A3-type, DNA-binding	0.800332	-0.7563	-2.7226	-4.3583	1.3967	2.11535	-2.30557					Nitab4.5_0000274g0130	Nitab4.5_0001468g0070	Nitab4.5_0001180g0220	Nitab4.5_0000765g0050	Nitab4.5_0000413g0220	Nitab4.5_0000608g0110
Jumonji	Nitab4.5_0003250g0020	Transcription factor jumonji jmjC domain protein IPR003347 Transcription factor jumonji_aspartyl beta-hydroxylase	1.16314	-1.34426	-0.441259	-0.513065	1.88276	3.46384	-0.944909					Nitab4.5_0000274g0230	Nitab4.5_0001478g0040	Nitab4.5_0001181g0050	Nitab4.5_0000766g0050	Nitab4.5_0000414g0060	Nitab4.5_0000614g0090
LIM	Nitab4.5_0000497g0200	LIM domain protein IPR001781 Zinc finger, LIM-type	11.7225	1.41331	0.769539	1.37569	1.21045	1.19154	0.0318756					Nitab4.5_0000274g0250	Nitab4.5_0001492g0060	Nitab4.5_0001185g0050	Nitab4.5_0000766g0070	Nitab4.5_0000416g0140	Nitab4.5_0000614g0100
LOB	Nitab4.5_0000164g0200	LOB domain protein 38 IPR004883 Lateral organ boundaries, LOB	5.83083	1.16579	-0.104082	-0.161097	0.203682	0.0300944	1.37218					Nitab4.5_0000278g0010	Nitab4.5_0001492g0080	Nitab4.5_0001187g0120	Nitab4.5_0000769g0010	Nitab4.5_0000420g0030	Nitab4.5_0000618g0070
	Nitab4.5_0000175g0100	LOB domain protein 4 IPR004883 Lateral organ boundaries, LOB	20.4248	1.00254	0.664491	-0.412168	0.147386	0.226033	-0.238053					Nitab4.5_0000278g0030	Nitab4.5_0001495g0070	Nitab4.5_0001205g0010	Nitab4.5_0000769g0190	Nitab4.5_0000421g0020	Nitab4.5_0000620g0190
	Nitab4.5_0000682g0050	LOB domain protein 42 IPR004883 Lateral organ boundaries, LOB	48.2353	1.39128	0.771353	-0.708079	-0.805245	-1.44484	-0.67178					Nitab4.5_0000278g0040	Nitab4.5_0001503g0100	Nitab4.5_0001208g0090	Nitab4.5_0000775g0080	Nitab4.5_0000421g0130	Nitab4.5_0000620g0200
	Nitab4.5_0000791g0130	LOB domain protein 42 IPR004883 Lateral organ boundaries, LOB	4.85494	2.83841	1.42001	-0.373429	-1.66585	-0.447032	1.13213					Nitab4.5_0000278g0160	Nitab4.5_0001526g0030	Nitab4.5_0001225g0250	Nitab4.5_0000777g0120	Nitab4.5_0000424g0010	Nitab4.5_0000620g0210
	Nitab4.5_0000974g0060	LOB domain protein 42 IPR004883 Lateral organ boundaries, LOB	66.1491	1.14957	0.95482	-0.306496	-0.465583	-0.723411	0.14977					Nitab4.5_0000278g0210	Nitab4.5_0001541g0050	Nitab4.5_0001232g0040	Nitab4.5_0000786g0210	Nitab4.5_0000425g0010	Nitab4.5_0000622g0230
	Nitab4.5_0001569g0160	LOB domain protein 42 IPR004883 Lateral organ boundaries, LOB	47.0676	1.49192	1.01749	-0.360508	-0.506703	-1.39928	-0.260451					Nitab4.5_0000281g0030	Nitab4.5_0001569g0140	Nitab4.5_0001237g0050	Nitab4.5_0000786g0230	Nitab4.5_0000425g0210	Nitab4.5_0000628g0020
	Nitab4.5_0001578g0030	LOB domain protein 1 IPR004883 Lateral organ boundaries, LOB	1.92203	1.69957	0.221483	0.929775	1.0158	1.23342	-0.179886					Nitab4.5_0000283g0200	Nitab4.5_0001569g0160	Nitab4.5_0001243g0040	Nitab4.5_0000786g0240	Nitab4.5_0000426g0230	Nitab4.5_0000628g0110
	Nitab4.5_0002003g0070	LOB domain protein 38 IPR004883 Lateral organ boundaries, LOB	26.8691	-1.11348	-0.821346	-0.0638146	-0.15754	0.233199	-0.269121					Nitab4.5_0000283g0400	Nitab4.5_0001579g0060	Nitab4.5_0001244g0160	Nitab4.5_0000788g0010	Nitab4.5_0000430g0050	Nitab4.5_0000634g0140
	Nitab4.5_0003373g0060	LOB domain protein 42 IPR004883 Lateral organ boundaries, LOB	7.48374	2.26236	1.1625	0.157621	-0.676	-1.56756	1.05695					Nitab4.5_0000284g0070	Nitab4.5_0001583g0150	Nitab4.5_0001252g0030	Nitab4.5_0000798g0130	Nitab4.5_0000433g0070	Nitab4.5_0000634g0220
	Nitab4.5_0006802g0020	LOB domain protein 1 IPR004883 Lateral organ boundaries, LOB	18.994	-1.20167	-1.68506	-1.23646	-1.10613	-1.99129	-1.8001					Nitab4.5_0000286g0050	Nitab4.5_0001604g0120	Nitab4.5_0001294g0010	Nitab4.5_0000800g0030	Nitab4.5_0000434g0080	Nitab4.5_0000637g0030
	Nitab4.5_0008474g0010	LOB domain protein 42 IPR004883 Lateral organ boundaries, LOB	78.767	1.00523	0.897652	-0.101734	-0.369898	-0.548966	0.257418					Nitab4.5_0000286g0060	Nitab4.5_0001607g0020	Nitab4.5_0001299g0080	Nitab4.5_0000801g0040	Nitab4.5_0000436g0180	Nitab4.5_0000638g0170
	Nitab4.5_0000376g0040	Ethylene-responsive transcription factor 2 IPR001471 Pathogenesis-related transcriptional factor and ERF, DNA-binding	5.18706	0.33148	0.384401	-1.21779	-0.987106	-0.111133	-0.870322					Nitab4.5_0000287g0030	Nitab4.5_0001607g0030	Nitab4.5_0001310g0030	Nitab4.5_0000803g0050	Nitab4.5_0000440g0100	Nitab4.5_0000640g0170
	Nitab4.5_0002682g0130	NA	28.885	-0.674717	-0.903371	-1.05493	-0.971175	-1.36488	-1.02894					Nitab4.5_0000287g0240	Nitab4.5_0001612g0020	Nitab4.5_0001318g0050	Nitab4.5_0000807g0070	Nitab4.5_0000444g0150	Nitab4.5_0000641g0050
	Nitab4.5_0008748g0010	LOB domain protein 1 IPR004883 Lateral organ boundaries, LOB	5.48168	0.639883	-0.615057	0.528414	0.262183	1.37645	-0.458098					Nitab4.5_0000287g0380	Nitab4.5_0001618g0220	Nitab4.5_0001320g0150	Nitab4.5_0000807g0110	Nitab4.5_0000444g0190	Nitab4.5_0000646g0090
	Nitab4.5_0005385g0030	LOB domain protein 38 IPR004883 Lateral organ boundaries, LOB	4.67301	0.507103	-0.00836124	-0.0453211	0.510119	0.594594	1.78658					Nitab4.5_0000288g0110	Nitab4.5_0001643g0100	Nitab4.5_0001332g0010	Nitab4.5_0000817g0030	Nitab4.5_0000445g0130	Nitab4.5_0000647g0190
MADS	Nitab4.5_0000748g0100	MADS box transcription factor IPR002100 Transcription factor, MADS-box	47.3554	-1.4456	-0.0247111	-1.01294	-0.459758	-1.39656	-0.99073					Nitab4.5_0000290g0060	Nitab4.5_0001644g0100	Nitab4.5_0001340g0050	Nitab4.5_0000831g0030	Nitab4.5_0000457g0110	Nitab4.5_0000650g0100
	Nitab4.5_0000927g0060	MADS box transcription factor IPR002100 Transcription factor, MADS-box	41.2737	-1.3819	0.296041	-1.11611	-0.213882	-1.03515	-0.456815					Nitab4.5_0000293g0090	Nitab4.5_0001654g0010	Nitab4.5_0001348g0050	Nitab4.5_0000833g0010	Nitab4.5_0000457g0370	Nitab4.5_0000651g0010
	Nitab4.5_0001127g0080	MADS box transcription factor IPR002100 Transcription factor, MADS-box	5.73525	1.91713	1.11946	0.708164	0.153298	0.373996	0.987566					Nitab4.5_0000295g0020	Nitab4.5_0001654g0020	Nitab4.5_0001372g0020	Nitab4.5_0000833g0060	Nitab4.5_0000459g0060	Nitab4.5_0000652g0050
	Nitab4.5_0001541g0050	MADS box transcription factor IPR002100 Transcription factor, MADS-box	19.8809	-1.46652	-1.16833	-0.868757	-0.772069	-1.5823	-0.239488					Nitab4.5_0000296g0140	Nitab4.5_0001657g0010	Nitab4.5_0001380g0020	Nitab4.5_0000837g0120	Nitab4.5_0000460g0040	Nitab4.5_0000658g0110
	Nitab4.5_0002449g0010	MADS box transcription factor IPR002487 Transcription factor, K-box	25.8222	1.14428	0.888954	0.832399	0.997007	1.03729	0.0386899					Nitab4.5_0000297g0170	Nitab4.5_0001658g0020	Nitab4.5_0001383g0180	Nitab4.5_0000839g0060	Nitab4.5_0000461g0140	Nitab4.5_0000667g0190
	Nitab4.5_0002467g0090	MADS box transcription factor IPR002487 Transcription factor, K-box	1.26974	1.99029	1.10098	1.0876	0.726879	1.11616	0.305189					Nitab4.5_0000297g0310	Nitab4.5_0001662g0020	Nitab4.5_0001393g0020	Nitab4.5_0000841g0070	Nitab4.5_0000461g0280	Nitab4.5_0000669g0110
	Nitab4.5_0007505g0060	MADS box transcription factor IPR002487 Transcription factor, K-box	14.4964	1.6188	1.05804	1.24256	1.30383	1.01194	1.08366					Nitab4.5_0000302g0110	Nitab4.5_0001662g0030	Nitab4.5_0001441g0060	Nitab4.5_0000842g0010	Nitab4.5_0000461g0310	Nitab4.5_0000677g0100
	Nitab4.5_0010693g0010	MADS-box transcription factor IPR002100 Transcription factor, MADS-box	5.6823	2.16167	2.25903	0.778779	0.700645	1.4038	-0.261742					Nitab4.5_0000302g0120	Nitab4.5_0001699g0020	Nitab4.5_0001453g0100	Nitab4.5_0000852g0060	Nitab4.5_0000462g0080	Nitab4.5_0000678g0050
	Nitab4.5_0014584g0010	MADS box transcription factor IPR002100 Transcription factor, MADS-box IPR002487 Transcription factor, K-box	1.71771	-2.41515	-1.67997	-1.05278	-0.500009	-0.457434	-0.230842					Nitab4.5_0000304g0030	Nitab4.5_0001711g0040	Nitab4.5_0001459g0110	Nitab4.5_0000856g0190	Nitab4.5_0000462g0090	Nitab4.5_0000679g0050
	Nitab4.5_0021852g0010	MADS-box transcription factor IPR002100 Transcription factor, MADS-box	0.216151	4.66661	4.29123	3.6107	3.1222	4.04889	0.133541					Nitab4.5_0000304g0040	Nitab4.5_0001735g0070	Nitab4.5_0001477g0080	Nitab4.5_0000863g0200	Nitab4.5_0000462g0110	Nitab4.5_0000679g0100
	Nitab4.5_0003774g0010	NA	3.99907	0.919402	0.284737	0.270889	-0.185987	1.3887	1.50164					Nitab4.5_0000305g0100	Nitab4.5_0001750g0050	Nitab4.5_0001485g0200	Nitab4.5_0000864g0130	Nitab4.5_0000463g0020	Nitab4.5_0000679g0150
	Nitab4.5_0005766g0030	MADS-box transcription factor 1 IPR002100 Transcription factor, MADS-box	0.795278	-1.62327	-0.817768	-1.75107	-1.95615	-12.9574	-1.87052					Nitab4.5_0000305g0140	Nitab4.5_0001758g0020	Nitab4.5_0001489g0010	Nitab4.5_0000871g0040	Nitab4.5_0000466g0010	Nitab4.5_0000680g0130
MBF1	Nitab4.5_0002113g0180	Multiprotein bridging factor 1 IPR013729 Multiprotein bridging factor 1, N-terminal	145.017	-3.64531	-0.963801	-3.84744	-5.36126	-6.27161	-6.56213					Nitab4.5_0000305g0340	Nitab4.5_0001781g0130	Nitab4.5_0001492g0060	Nitab4.5_0000871g0060	Nitab4.5_0000469g0040	Nitab4.5_0000681g0080
	Nitab4.5_0011667g0010	Multiprotein bridging factor 1 IPR013729 Multiprotein bridging factor 1, N-terminal	218.622	-5.78822	-1.30707	-4.49926	-6.46374	-6.752	-7.68183					Nitab4.5_0000306g0050	Nitab4.5_0001789g0020	Nitab4.5_0001495g0070	Nitab4.5_0000874g0180	Nitab4.5_0000470g0170	Nitab4.5_0000681g0150
MYB	Nitab4.5_0000005g0090	MYB transcription factor (Fragment) IPR006447 Myb-like DNA-binding region, SHAQKYF class	1.49816	3.17561	2.16517	-0.160667	-1.55007	-0.381606	2.38828					Nitab4.5_0000306g0340	Nitab4.5_0001819g0100	Nitab4.5_0001495g0130	Nitab4.5_0000876g0130	Nitab4.5_0000470g0190	Nitab4.5_0000683g0100
	Nitab4.5_0000057g0160	MYB transcription factor IPR015495 Myb transcription factor	1.68852	1.82699	1.80916	-1.75502	-0.83892	-1.96655	-2.71964					Nitab4.5_0000307g0020	Nitab4.5_0001840g0060	Nitab4.5_0001506g0060	Nitab4.5_0000876g0140	Nitab4.5_0000472g0340	Nitab4.5_0000686g0110
	Nitab4.5_0000107g0030	MYB transcription factor IPR015495 Myb transcription factor	3.48062	1.3784	0.109979	0.331901	-0.267893	-0.187738	-0.227943					Nitab4.5_0000307g0180	Nitab4.5_0001842g0020	Nitab4.5_0001523g0010	Nitab4.5_0000880g0040	Nitab4.5_0000483g0140	Nitab4.5_0000686g0120
	Nitab4.5_0000202g0460	MYB transcription factor (Fragment) IPR006447 Myb-like DNA-binding region, SHAQKYF class	6.66762	1.87208	0.921126	-0.113693	-1.10542	-1.95309	1.26285					Nitab4.5_0000307g0330	Nitab4.5_0001856g0060	Nitab4.5_0001551g0070	Nitab4.5_0000883g0020	Nitab4.5_0000488g0030	Nitab4.5_0000688g0070
	Nitab4.5_0000225g0010	MYB transcription factor IPR015495 Myb transcription factor	1.01523	2.00802	1.55388	-0.830459	0.340037	0.0489921	0.376023					Nitab4.5_0000308g0310	Nitab4.5_0001860g0140	Nitab4.5_0001559g0010	Nitab4.5_0000886g0020	Nitab4.5_0000491g0080	Nitab4.5_0000690g0070
	Nitab4.5_0000232g0160	MYB transcription factor IPR015495 Myb transcription factor	7.01493	1.20338	-0.287783	0.295455	-0.260362	0.104761	-0.0426949					Nitab4.5_0000308g0330	Nitab4.5_0001861g0120	Nitab4.5_0001579g0060	Nitab4.5_0000886g0120	Nitab4.5_0000492g0020	Nitab4.5_0000696g0060
	Nitab4.5_0000244g0260	MYB transcription factor IPR015495 Myb transcription factor	7.12479	-1.53331	-1.72347	-0.426672	-0.737074	-1.53823	-0.54674					Nitab4.5_0000309g0200	Nitab4.5_0001884g0050	Nitab4.5_0001594g0020	Nitab4.5_0000892g0010	Nitab4.5_0000495g0090	Nitab4.5_0000697g0070
	Nitab4.5_0000278g0160	MYB transcription factor IPR006447 Myb-like DNA-binding region, SHAQKYF class	51.0027	-1.01889	-0.789962	-0.614771	-0.607568	-0.986267	-0.564578					Nitab4.5_0000311g0030	Nitab4.5_0001887g0050	Nitab4.5_0001604g0120	Nitab4.5_0000900g0120	Nitab4.5_0000497g0200	Nitab4.5_0000698g0020
	Nitab4.5_0000381g0220	Myb family transcription factor-like IPR006447 Myb-like DNA-binding region, SHAQKYF class	11.4936	-1.56436	-0.76596	-0.764903	-0.548404	-0.557154	-1.20929					Nitab4.5_0000312g0060	Nitab4.5_0001896g0070	Nitab4.5_0001607g0030	Nitab4.5_0000900g0150	Nitab4.5_0000498g0090	Nitab4.5_0000704g0080
	Nitab4.5_0000578g0120	MYB transcription factor IPR015495 Myb transcription factor	31.5086	-1.02806	-0.586435	0.0239002	-0.361746	-0.28202	-0.179325					Nitab4.5_0000312g0130	Nitab4.5_0001912g0020	Nitab4.5_0001615g0210	Nitab4.5_0000901g0090	Nitab4.5_0000500g0100	Nitab4.5_0000705g0070
	Nitab4.5_0000610g0290	MYB transcription factor IPR015495 Myb transcription factor	67.7068	-1.67437	-1.21966	-0.496638	-0.946364	-2.12195	-0.228685					Nitab4.5_0000312g0280	Nitab4.5_0001916g0070	Nitab4.5_0001622g0050	Nitab4.5_0000905g0130	Nitab4.5_0000500g0210	Nitab4.5_0000706g0170
	Nitab4.5_0000613g0190	MYB transcription factor IPR015495 Myb transcription factor	3.94011	1.95368	1.49158	-0.114918	-0.145824	0.620604	0.479052					Nitab4.5_0000312g0300	Nitab4.5_0001925g0250	Nitab4.5_0001624g0040	Nitab4.5_0000907g0090	Nitab4.5_0000503g0010	Nitab4.5_0000710g0010
	Nitab4.5_0000649g0090	MYB transcription factor IPR015495 Myb transcription factor	20.423	1.5712	-0.0367449	-0.718277	-0.337989	0.370076	-0.0551758					Nitab4.5_0000312g0340	Nitab4.5_0001926g0060	Nitab4.5_0001640g0050	Nitab4.5_0000914g0300	Nitab4.5_0000504g0030	Nitab4.5_0000715g0110
	Nitab4.5_0000713g0070	Myb transcription factor IPR006447 Myb-like DNA-binding region, SHAQKYF class	7.78911	-2.22309	-2.16283	-0.983508	-1.70144	-1.30194	-0.99106					Nitab4.5_0000313g0040	Nitab4.5_0001935g0040	Nitab4.5_0001642g0050	Nitab4.5_0000916g0060	Nitab4.5_0000504g0040	Nitab4.5_0000715g0220
	Nitab4.5_0000745g0040	MYB transcription factor IPR015495 Myb transcription factor	4.97536	3.9713	1.74104	-1.73872	-1.34848	1.04508	0.270457					Nitab4.5_0000314g0010	Nitab4.5_0001952g0110	Nitab4.5_0001644g0100	Nitab4.5_0000923g0050	Nitab4.5_0000505g0110	Nitab4.5_0000716g0190
	Nitab4.5_0000745g0220	MYB transcription factor IPR015495 Myb transcription factor	2.29324	1.73703	0.101457	-1.58308	-0.861485	0.891417	-0.307142					Nitab4.5_0000314g0020	Nitab4.5_0001955g0110	Nitab4.5_0001650g0020	Nitab4.5_0000932g0020	Nitab4.5_0000510g0040	Nitab4.5_0000716g0250
	Nitab4.5_0000747g0030	Myb-related transcription factor IPR015495 Myb transcription factor	0.612696	2.02703	0.819828	-0.653702	0.145218	0.439111	0.022106					Nitab4.5_0000314g0040	Nitab4.5_0001970g0020	Nitab4.5_0001652g0150	Nitab4.5_0000933g0020	Nitab4.5_0000512g0230	Nitab4.5_0000718g0210
	Nitab4.5_0000766g0070	MYB transcription factor IPR015495 Myb transcription factor	33.4062	-1.49681	-1.32881	-0.758457	-1.09998	-2.07425	-0.260784					Nitab4.5_0000314g0050	Nitab4.5_0001979g0030	Nitab4.5_0001653g0040	Nitab4.5_0000933g0030	Nitab4.5_0000513g0100	Nitab4.5_0000722g0020
	Nitab4.5_0000895g0070	MYB transcription factor IPR015495 Myb transcription factor	15.1342	1.9525	1.07895	-0.916603	-0.536754	-0.0183939	0.00963981					Nitab4.5_0000314g0090	Nitab4.5_0001982g0010	Nitab4.5_0001657g0010	Nitab4.5_0000939g0020	Nitab4.5_0000513g0130	Nitab4.5_0000723g0230
	Nitab4.5_0001041g0130	MYB transcription factor IPR015495 Myb transcription factor	70.5784	1.8613	0.559076	-0.555864	1.15062	1.15663	-0.370526					Nitab4.5_0000314g0100	Nitab4.5_0001982g0050	Nitab4.5_0001659g0030	Nitab4.5_0000955g0060	Nitab4.5_0000515g0010	Nitab4.5_0000726g0070
	Nitab4.5_0001047g0070	MYB transcription factor IPR006447 Myb-like DNA-binding region, SHAQKYF class	16.6436	1.29413	0.878992	-0.591165	-0.632808	-0.543082	-0.389032					Nitab4.5_0000316g0050	Nitab4.5_0001984g0020	Nitab4.5_0001662g0020	Nitab4.5_0000957g0130	Nitab4.5_0000519g0150	Nitab4.5_0000738g0040
	Nitab4.5_0001050g0010	MYB transcription factor IPR015495 Myb transcription factor	8.91508	1.20633	0.304397	0.924551	0.409124	0.915023	-0.05032					Nitab4.5_0000319g0040	Nitab4.5_0001998g0010	Nitab4.5_0001664g0050	Nitab4.5_0000959g0110	Nitab4.5_0000521g0070	Nitab4.5_0000742g0110
	Nitab4.5_0001163g0150	MYB transcription factor IPR015495 Myb transcription factor	3.08189	1.17399	0.447039	1.29255	0.768525	1.2108	0.221435					Nitab4.5_0000319g0220	Nitab4.5_0002002g0110	Nitab4.5_0001664g0080	Nitab4.5_0000965g0040	Nitab4.5_0000527g0090	Nitab4.5_0000744g0050
	Nitab4.5_0001769g0160	MYB transcription factor IPR015495 Myb transcription factor	1.95239	4.09591	0.896971	-1.96163	-1.88393	0.525701	-0.384165					Nitab4.5_0000319g0290	Nitab4.5_0002020g0050	Nitab4.5_0001668g0080	Nitab4.5_0000973g0030	Nitab4.5_0000536g0010	Nitab4.5_0000744g0140
	Nitab4.5_0001786g0040	MYB transcription factor IPR006447 Myb-like DNA-binding region, SHAQKYF class	11.607	1.39329	0.585624	-0.30364	-0.427441	0.598709	0.218905					Nitab4.5_0000321g0020	Nitab4.5_0002031g0050	Nitab4.5_0001675g0080	Nitab4.5_0000977g0030	Nitab4.5_0000545g0040	Nitab4.5_0000744g0180
	Nitab4.5_0001814g0020	MYB transcription factor IPR015495 Myb transcription factor	2.52998	1.37149	0.154379	-1.78824	-1.0245	-0.668889	-0.630838					Nitab4.5_0000321g0210	Nitab4.5_0002042g0070	Nitab4.5_0001688g0070	Nitab4.5_0000977g0070	Nitab4.5_0000552g0070	Nitab4.5_0000751g0070
	Nitab4.5_0002163g0070	MYB transcription factor IPR015495 Myb transcription factor	2.61636	3.36587	0.581088	-2.41361	1.29069	1.54972	0.0442741					Nitab4.5_0000322g0110	Nitab4.5_0002088g0040	Nitab4.5_0001699g0020	Nitab4.5_0000977g0080	Nitab4.5_0000555g0140	Nitab4.5_0000754g0250
	Nitab4.5_0002222g0050	MYB transcription factor IPR015495 Myb transcription factor	3.47612	1.34954	-1.01195	-1.0924	-1.97674	-0.918345	-0.298321					Nitab4.5_0000328g0130	Nitab4.5_0002093g0020	Nitab4.5_0001700g0060	Nitab4.5_0000980g0220	Nitab4.5_0000555g0150	Nitab4.5_0000758g0010
	Nitab4.5_0003212g0030	MYB transcription factor IPR015495 Myb transcription factor	28.6561	-1.28606	-1.49153	-0.699165	-0.77863	-1.9387	0.099794					Nitab4.5_0000332g0110	Nitab4.5_0002102g0030	Nitab4.5_0001703g0040	Nitab4.5_0000980g0350	Nitab4.5_0000556g0240	Nitab4.5_0000758g0060
	Nitab4.5_0003631g0010	MYB transcription factor IPR015495 Myb transcription factor	3.44975	1.23234	0.156002	0.531866	0.167156	0.640419	0.00695861					Nitab4.5_0000335g0110	Nitab4.5_0002115g0020	Nitab4.5_0001704g0060	Nitab4.5_0000990g0040	Nitab4.5_0000558g0010	Nitab4.5_0000759g0150
	Nitab4.5_0003820g0040	MYB transcription factor (Fragment) IPR006447 Myb-like DNA-binding region, SHAQKYF class	9.54508	1.65045	0.647445	-0.0174376	-0.775648	-1.64978	1.13403					Nitab4.5_0000337g0100	Nitab4.5_0002137g0140	Nitab4.5_0001707g0050	Nitab4.5_0001000g0100	Nitab4.5_0000559g0220	Nitab4.5_0000759g0220
	Nitab4.5_0004614g0010	MYB transcription factor (Fragment) IPR006447 Myb-like DNA-binding region, SHAQKYF class	16.0654	1.31544	0.426512	-0.862629	-2.51626	-4.04321	0.24816					Nitab4.5_0000337g0110	Nitab4.5_0002150g0010	Nitab4.5_0001709g0010	Nitab4.5_0001003g0020	Nitab4.5_0000562g0080	Nitab4.5_0000759g0270
	Nitab4.5_0004621g0030	MYB transcription factor IPR015495 Myb transcription factor	5.69555	-1.44585	-1.49436	-0.0903603	-0.719609	-1.49418	-0.262487					Nitab4.5_0000338g0240	Nitab4.5_0002156g0050	Nitab4.5_0001715g0090	Nitab4.5_0001013g0090	Nitab4.5_0000562g0110	Nitab4.5_0000766g0060
	Nitab4.5_0004821g0020	MYB transcription factor (Fragment) IPR006447 Myb-like DNA-binding region, SHAQKYF class	2.77602	3.32853	1.97168	0.0422674	-0.66403	-1.16512	1.78482					Nitab4.5_0000339g0010	Nitab4.5_0002157g0030	Nitab4.5_0001716g0010	Nitab4.5_0001014g0160	Nitab4.5_0000565g0130	Nitab4.5_0000769g0190
	Nitab4.5_0005512g0020	MYB transcription factor IPR015495 Myb transcription factor	3.12473	-1.91027	-0.868815	-0.790244	-0.4406	-0.102911	-0.225538					Nitab4.5_0000342g0220	Nitab4.5_0002158g0130	Nitab4.5_0001727g0170	Nitab4.5_0001026g0010	Nitab4.5_0000565g0270	Nitab4.5_0000771g0070
	Nitab4.5_0005769g0080	MYB transcription factor IPR015495 Myb transcription factor	17.7622	1.61958	0.5507	-0.7098	-0.701677	0.178439	0.467033					Nitab4.5_0000342g0270	Nitab4.5_0002167g0030	Nitab4.5_0001735g0040	Nitab4.5_0001026g0060	Nitab4.5_0000566g0200	Nitab4.5_0000775g0080
	Nitab4.5_0006037g0010	MYB transcription factor IPR015495 Myb transcription factor	6.50323	1.5549	0.676117	-0.537341	-0.482389	-0.275434	-0.294185					Nitab4.5_0000343g0190	Nitab4.5_0002177g0010	Nitab4.5_0001739g0070	Nitab4.5_0001028g0120	Nitab4.5_0000570g0290	Nitab4.5_0000782g0010
	Nitab4.5_0006516g0020	MYB transcription factor IPR015495 Myb transcription factor	1.23748	4.63549	0.708338	-2.41899	0.100871	2.03214	-0.304104					Nitab4.5_0000345g0080	Nitab4.5_0002177g0170	Nitab4.5_0001744g0070	Nitab4.5_0001028g0130	Nitab4.5_0000573g0060	Nitab4.5_0000784g0060
	Nitab4.5_0006640g0010	MYB transcription factor IPR015495 Myb transcription factor	1.68136	1.83573	0.950003	1.20497	0.0947226	0.415487	0.527845					Nitab4.5_0000349g0060	Nitab4.5_0002182g0090	Nitab4.5_0001750g0050	Nitab4.5_0001028g0150	Nitab4.5_0000574g0090	Nitab4.5_0000787g0200
	Nitab4.5_0006658g0010	Myb-related transcription factor IPR015495 Myb transcription factor	5.11656	1.53416	2.20132	0.569781	0.333441	1.43981	0.494146					Nitab4.5_0000350g0060	Nitab4.5_0002221g0060	Nitab4.5_0001780g0080	Nitab4.5_0001034g0130	Nitab4.5_0000574g0130	Nitab4.5_0000787g0240
	Nitab4.5_0006804g0010	MYB transcription factor IPR015495 Myb transcription factor	5.21149	-1.81857	-0.233689	-0.0558988	0.0529914	-0.38205	-1.34403					Nitab4.5_0000351g0050	Nitab4.5_0002232g0070	Nitab4.5_0001780g0110	Nitab4.5_0001035g0010	Nitab4.5_0000574g0150	Nitab4.5_0000795g0020
	Nitab4.5_0007679g0010	MYB transcription factor IPR015495 Myb transcription factor	31.9401	-1.08954	-0.73516	-0.131714	-0.214299	-0.578024	-0.089427					Nitab4.5_0000354g0180	Nitab4.5_0002241g0040	Nitab4.5_0001788g0240	Nitab4.5_0001036g0110	Nitab4.5_0000574g0200	Nitab4.5_0000799g0010
	Nitab4.5_0008604g0010	MYB transcription factor IPR015495 Myb transcription factor	3.24705	3.78252	1.04652	-2.06951	0.168628	1.04694	-1.25276					Nitab4.5_0000355g0100	Nitab4.5_0002253g0010	Nitab4.5_0001791g0030	Nitab4.5_0001040g0130	Nitab4.5_0000578g0200	Nitab4.5_0000799g0020
	Nitab4.5_0008924g0010	MYB transcription factor IPR015495 Myb transcription factor	6.5749	1.63694	-0.54955	-0.765877	-0.245459	0.588099	0.100316					Nitab4.5_0000355g0150	Nitab4.5_0002282g0120	Nitab4.5_0001814g0020	Nitab4.5_0001041g0130	Nitab4.5_0000580g0250	Nitab4.5_0000803g0050
	Nitab4.5_0009714g0010	MYB transcription factor (Fragment) IPR006447 Myb-like DNA-binding region, SHAQKYF class	2.50918	1.64066	1.08314	0.201786	-0.168389	-0.741794	0.855131					Nitab4.5_0000355g0180	Nitab4.5_0002294g0130	Nitab4.5_0001817g0020	Nitab4.5_0001043g0040	Nitab4.5_0000583g0180	Nitab4.5_0000806g0070
	Nitab4.5_0011004g0010	MYB transcription factor IPR015495 Myb transcription factor	2.44401	1.83946	0.122515	-0.0579117	0.396534	0.514149	0.252052					Nitab4.5_0000356g0010	Nitab4.5_0002303g0040	Nitab4.5_0001842g0020	Nitab4.5_0001059g0090	Nitab4.5_0000588g0340	Nitab4.5_0000807g0070
	Nitab4.5_0011903g0010	Myb transcription factor IPR006447 Myb-like DNA-binding region, SHAQKYF class	3.15886	-1.88468	-1.04143	0.108476	1.39612	-0.626026	-0.43483					Nitab4.5_0000357g0250	Nitab4.5_0002311g0020	Nitab4.5_0001855g0070	Nitab4.5_0001064g0060	Nitab4.5_0000593g0080	Nitab4.5_0000807g0110
	Nitab4.5_0012320g0020	Myb family transcription factor-like IPR006447 Myb-like DNA-binding region, SHAQKYF class	7.35922	-1.13392	-0.924946	-0.714719	-0.266211	-0.360553	-1.07454					Nitab4.5_0000358g0150	Nitab4.5_0002314g0010	Nitab4.5_0001884g0050	Nitab4.5_0001068g0010	Nitab4.5_0000593g0240	Nitab4.5_0000814g0050
	Nitab4.5_0016704g0010	Myb-related transcription factor IPR017930 Myb-type HTH DNA-binding domain	15.8322	1.02779	1.49798	0.0440972	0.377531	0.614075	0.307327					Nitab4.5_0000363g0010	Nitab4.5_0002321g0060	Nitab4.5_0001894g0010	Nitab4.5_0001087g0030	Nitab4.5_0000595g0010	Nitab4.5_0000815g0030
	Nitab4.5_0018794g0010	Myb-related transcription factor IPR015495 Myb transcription factor	5.924	1.15056	1.61679	0.778149	-0.130075	1.33489	1.19928					Nitab4.5_0000368g0010	Nitab4.5_0002322g0170	Nitab4.5_0001894g0040	Nitab4.5_0001088g0200	Nitab4.5_0000596g0020	Nitab4.5_0000818g0010
	Nitab4.5_0000070g0110	MYB transcription factor IPR015495 Myb transcription factor	9.33061	-0.0129833	-1.95137	-1.06602	-1.71008	-1.77386	-0.160759					Nitab4.5_0000368g0190	Nitab4.5_0002353g0100	Nitab4.5_0001912g0020	Nitab4.5_0001091g0070	Nitab4.5_0000597g0020	Nitab4.5_0000819g0060
	Nitab4.5_0000109g0340	MYB transcription factor IPR015495 Myb transcription factor	1.25482	-0.0397115	2.03154	0.247387	-0.884142	0.826524	0.98042					Nitab4.5_0000368g0240	Nitab4.5_0002370g0050	Nitab4.5_0001922g0090	Nitab4.5_0001091g0090	Nitab4.5_0000604g0110	Nitab4.5_0000826g0100
	Nitab4.5_0006880g0040	MYB transcription factor IPR015495 Myb transcription factor	3.56753	0.140961	1.82845	0.250988	-0.717655	1.05987	0.783887					Nitab4.5_0000368g0310	Nitab4.5_0002418g0030	Nitab4.5_0001925g0070	Nitab4.5_0001096g0050	Nitab4.5_0000605g0120	Nitab4.5_0000829g0140
	Nitab4.5_0000274g0200	MYB transcription factor IPR015495 Myb transcription factor	1.01634	0.746529	0.461227	1.70486	0.973055	0.871739	-0.257903					Nitab4.5_0000368g0400	Nitab4.5_0002436g0020	Nitab4.5_0001925g0250	Nitab4.5_0001099g0050	Nitab4.5_0000608g0110	Nitab4.5_0000831g0120
	Nitab4.5_0000541g0100	Myb-like transcription factor IPR015495 Myb transcription factor	0.583635	-0.196792	-0.564419	2.3358	0.977986	0.523205	0.231842					Nitab4.5_0000371g0020	Nitab4.5_0002443g0040	Nitab4.5_0001944g0030	Nitab4.5_0001110g0140	Nitab4.5_0000610g0020	Nitab4.5_0000833g0010
	Nitab4.5_0001180g0220	MYB transcription factor (Fragment) IPR006447 Myb-like DNA-binding region, SHAQKYF class	27.0073	-0.222997	-0.503244	-1.59887	-2.91015	-4.14714	-1.15077					Nitab4.5_0000373g0030	Nitab4.5_0002456g0130	Nitab4.5_0001952g0110	Nitab4.5_0001111g0050	Nitab4.5_0000610g0290	Nitab4.5_0000833g0060
	Nitab4.5_0002906g0080	MYB transcription factor IPR015495 Myb transcription factor	12.5622	-0.465173	-0.507917	-1.14523	-1.87742	-1.57361	-1.59998					Nitab4.5_0000373g0080	Nitab4.5_0002462g0090	Nitab4.5_0001955g0110	Nitab4.5_0001114g0030	Nitab4.5_0000618g0010	Nitab4.5_0000838g0070
	Nitab4.5_0003511g0010	Myb-like transcription factor IPR015495 Myb transcription factor	2.80893	-0.149947	-0.13555	1.26795	0.726845	0.128998	0.0761912					Nitab4.5_0000373g0270	Nitab4.5_0002466g0010	Nitab4.5_0001957g0020	Nitab4.5_0001119g0040	Nitab4.5_0000618g0070	Nitab4.5_0000844g0010
	Nitab4.5_0005769g0040	MYB transcription factor IPR015495 Myb transcription factor	2.76225	-0.867213	-1.27587	-2.22466	-1.75675	-1.52151	-1.11882					Nitab4.5_0000375g0070	Nitab4.5_0002498g0080	Nitab4.5_0001970g0020	Nitab4.5_0001119g0060	Nitab4.5_0000618g0120	Nitab4.5_0000845g0230
	Nitab4.5_0012173g0010	MYB transcription factor IPR015495 Myb transcription factor	2.63665	0.791365	0.383719	1.18801	0.629953	1.16483	-0.0979264					Nitab4.5_0000375g0320	Nitab4.5_0002521g0040	Nitab4.5_0002002g0110	Nitab4.5_0001128g0030	Nitab4.5_0000622g0140	Nitab4.5_0000850g0040
	Nitab4.5_0000068g0400	MYB transcription factor IPR015495 Myb transcription factor	9.16881	-0.0808336	-0.0130531	0.256952	1.43385	1.52514	-0.884949					Nitab4.5_0000376g0230	Nitab4.5_0002526g0100	Nitab4.5_0002003g0050	Nitab4.5_0001142g0030	Nitab4.5_0000625g0080	Nitab4.5_0000852g0050
	Nitab4.5_0000103g0280	Myb-related transcription factor IPR015495 Myb transcription factor	0.83771	-1.87157	0.431305	-2.47637	-13.0324	-0.649478	-0.560622					Nitab4.5_0000377g0180	Nitab4.5_0002534g0050	Nitab4.5_0002009g0020	Nitab4.5_0001143g0050	Nitab4.5_0000634g0140	Nitab4.5_0000856g0190
	Nitab4.5_0003179g0030	MYB transcription factor IPR015495 Myb transcription factor	67.6776	-0.971769	-0.937777	-0.610125	-1.12577	-2.37088	-0.216814					Nitab4.5_0000377g0210	Nitab4.5_0002541g0050	Nitab4.5_0002020g0050	Nitab4.5_0001146g0080	Nitab4.5_0000636g0130	Nitab4.5_0000857g0130
	Nitab4.5_0008039g0010	MYB transcription factor IPR015495 Myb transcription factor	13.3015	-0.000485259	0.10912	-0.085374	1.24424	1.1178	-0.544603					Nitab4.5_0000380g0050	Nitab4.5_0002543g0010	Nitab4.5_0002058g0120	Nitab4.5_0001157g0020	Nitab4.5_0000637g0030	Nitab4.5_0000859g0200
	Nitab4.5_0008488g0010	MYB transcription factor IPR015495 Myb transcription factor	5.22992	-1.24398	-1.57681	-0.885704	-2.18942	-1.38616	-0.501697					Nitab4.5_0000381g0220	Nitab4.5_0002545g0110	Nitab4.5_0002093g0010	Nitab4.5_0001157g0040	Nitab4.5_0000640g0140	Nitab4.5_0000860g0160
	Nitab4.5_0001172g0110	Myb transcription factor IPR006447 Myb-like DNA-binding region, SHAQKYF class	21.3885	-0.608324	-0.235478	-0.37881	-0.70981	-1.7812	-0.387843					Nitab4.5_0000381g0330	Nitab4.5_0002568g0030	Nitab4.5_0002102g0030	Nitab4.5_0001168g0160	Nitab4.5_0000640g0150	Nitab4.5_0000863g0190
	Nitab4.5_0004241g0060	Myb transcription factor IPR006447 Myb-like DNA-binding region, SHAQKYF class	18.4344	-0.487105	-0.246085	-0.407788	-0.632812	-1.5248	-0.137757					Nitab4.5_0000382g0040	Nitab4.5_0002577g0100	Nitab4.5_0002107g0060	Nitab4.5_0001171g0090	Nitab4.5_0000640g0170	Nitab4.5_0000863g0210
	Nitab4.5_0028143g0010	Myb family transcription factor (Fragment) IPR017877 MYB-like	0	0	11.2019	12.3806	13.0158	14.4837	10.6517					Nitab4.5_0000382g0070	Nitab4.5_0002588g0020	Nitab4.5_0002112g0110	Nitab4.5_0001175g0140	Nitab4.5_0000647g0190	Nitab4.5_0000870g0060
	Nitab4.5_0004786g0040	Transcription factor Myb IPR015495 Myb transcription factor	2.40977	0.820778	0.357488	0.859109	0.19486	1.10346	1.77093					Nitab4.5_0000383g0180	Nitab4.5_0002589g0070	Nitab4.5_0002113g0180	Nitab4.5_0001180g0220	Nitab4.5_0000649g0170	Nitab4.5_0000871g0060
NAC	Nitab4.5_0000208g0310	NAC domain protein IPR003441 protein	2.49033	1.43506	0.034472	0.336418	0.22353	0.228923	0.64656					Nitab4.5_0000383g0230	Nitab4.5_0002590g0030	Nitab4.5_0002137g0140	Nitab4.5_0001181g0050	Nitab4.5_0000649g0210	Nitab4.5_0000874g0180
	Nitab4.5_0000322g0110	NAC domain protein IPR003441 protein	14.8096	1.22501	0.566573	-0.592903	-1.15383	0.0524517	0.461703					Nitab4.5_0000386g0250	Nitab4.5_0002607g0070	Nitab4.5_0002145g0030	Nitab4.5_0001187g0120	Nitab4.5_0000649g0260	Nitab4.5_0000875g0110
	Nitab4.5_0000535g0120	NAC domain protein IPR003441 protein	1.52917	1.96421	1.35506	-0.126617	0.169951	1.50307	0.250413					Nitab4.5_0000386g0260	Nitab4.5_0002655g0080	Nitab4.5_0002163g0070	Nitab4.5_0001192g0080	Nitab4.5_0000650g0260	Nitab4.5_0000876g0040
	Nitab4.5_0000662g0120	NAC domain protein IPR003441 protein	1.56147	3.71498	1.73136	-1.5858	-2.31326	0.668309	-0.290932					Nitab4.5_0000387g0060	Nitab4.5_0002673g0040	Nitab4.5_0002177g0170	Nitab4.5_0001208g0090	Nitab4.5_0000651g0010	Nitab4.5_0000876g0130
	Nitab4.5_0000860g0160	NAC domain transcription factor protein	4.76644	1.13168	0.946199	0.374297	0.147105	0.52697	1.19462					Nitab4.5_0000389g0070	Nitab4.5_0002673g0050	Nitab4.5_0002182g0090	Nitab4.5_0001211g0280	Nitab4.5_0000651g0050	Nitab4.5_0000876g0140
	Nitab4.5_0001194g0040	NAC domain protein IPR003441 protein	2.02848	2.40062	0.588089	0.959242	0.0306509	1.37532	1.91055					Nitab4.5_0000390g0020	Nitab4.5_0002680g0060	Nitab4.5_0002196g0030	Nitab4.5_0001212g0030	Nitab4.5_0000652g0090	Nitab4.5_0000880g0080
	Nitab4.5_0001204g0100	NAC domain protein IPR003441 protein	1.36642	4.01464	1.89002	-1.67508	-1.28234	0.792241	0.117758					Nitab4.5_0000390g0030	Nitab4.5_0002687g0010	Nitab4.5_0002201g0040	Nitab4.5_0001212g0110	Nitab4.5_0000652g0220	Nitab4.5_0000881g0110
	Nitab4.5_0001204g0110	NAC domain transcription factor protein	1.36664	1.73886	0.289855	-0.382222	-0.123337	0.626176	0.381038					Nitab4.5_0000391g0050	Nitab4.5_0002687g0020	Nitab4.5_0002204g0080	Nitab4.5_0001215g0240	Nitab4.5_0000658g0110	Nitab4.5_0000883g0020
	Nitab4.5_0001610g0040	NAC domain protein IPR003441 protein	0.461839	2.67181	1.22041	-1.84544	-0.83921	0.633817	-1.41781					Nitab4.5_0000391g0160	Nitab4.5_0002715g0060	Nitab4.5_0002214g0060	Nitab4.5_0001223g0020	Nitab4.5_0000668g0080	Nitab4.5_0000884g0010
	Nitab4.5_0002321g0060	NAC domain protein IPR003441 protein	20.2937	-1.07789	-1.03235	-0.311071	-0.490396	-1.01785	-0.803219					Nitab4.5_0000401g0120	Nitab4.5_0002720g0030	Nitab4.5_0002224g0080	Nitab4.5_0001225g0250	Nitab4.5_0000669g0080	Nitab4.5_0000884g0030
	Nitab4.5_0002500g0070	NAC domain protein IPR003441 protein	2.80506	-1.81191	-0.955317	-1.18103	-0.914557	-1.10582	-1.99313					Nitab4.5_0000402g0010	Nitab4.5_0002723g0010	Nitab4.5_0002234g0040	Nitab4.5_0001229g0040	Nitab4.5_0000671g0010	Nitab4.5_0000895g0250
	Nitab4.5_0003763g0020	NAC domain transcription factor protein	3.70873	1.29028	1.00438	0.588925	0.276524	0.923902	1.08394					Nitab4.5_0000402g0040	Nitab4.5_0002723g0040	Nitab4.5_0002245g0100	Nitab4.5_0001234g0010	Nitab4.5_0000672g0080	Nitab4.5_0000900g0090
	Nitab4.5_0007985g0010	NAC domain protein IPR003441 protein	3.67706	1.9879	0.404731	0.628667	0.222091	1.40275	1.63831					Nitab4.5_0000402g0080	Nitab4.5_0002733g0050	Nitab4.5_0002252g0100	Nitab4.5_0001264g0190	Nitab4.5_0000676g0240	Nitab4.5_0000905g0130
	Nitab4.5_0009387g0010	NAC domain protein IPR003441 protein	15.7943	1.31553	0.234903	-0.516156	-0.890547	-0.00484623	0.196598					Nitab4.5_0000402g0150	Nitab4.5_0002758g0040	Nitab4.5_0002252g0110	Nitab4.5_0001286g0050	Nitab4.5_0000677g0200	Nitab4.5_0000907g0080
	Nitab4.5_0010993g0020	NAC domain protein protein	4.69354	1.92635	1.81253	-0.506614	0.0371976	0.245444	-0.015914					Nitab4.5_0000402g0160	Nitab4.5_0002762g0010	Nitab4.5_0002253g0010	Nitab4.5_0001288g0190	Nitab4.5_0000680g0050	Nitab4.5_0000928g0020
	Nitab4.5_0012710g0010	NAC domain protein IPR003441 protein	3.87554	1.15157	-0.686331	0.147157	-0.278647	0.237418	0.361411					Nitab4.5_0000402g0200	Nitab4.5_0002771g0030	Nitab4.5_0002282g0120	Nitab4.5_0001291g0080	Nitab4.5_0000680g0090	Nitab4.5_0000932g0020
	Nitab4.5_0017755g0010	NAC domain protein IPR003441 protein	0.54844	2.13686	1.20581	-0.113406	0.906663	1.31489	0.984005					Nitab4.5_0000402g0260	Nitab4.5_0002772g0010	Nitab4.5_0002286g0090	Nitab4.5_0001297g0050	Nitab4.5_0000680g0130	Nitab4.5_0000933g0030
	Nitab4.5_0000188g0310	NAC domain transcription factor protein	2.71561	-0.00505563	1.3133	-0.0947088	-1.27171	-0.390251	-0.290932					Nitab4.5_0000404g0030	Nitab4.5_0002783g0040	Nitab4.5_0002308g0020	Nitab4.5_0001301g0110	Nitab4.5_0000682g0040	Nitab4.5_0000941g0160
	Nitab4.5_0000040g0110	NAC domain transcription factor protein	12.9758	0.138357	0.303548	-1.31734	-1.95892	0.119738	-0.627644					Nitab4.5_0000404g0170	Nitab4.5_0002783g0140	Nitab4.5_0002308g0030	Nitab4.5_0001304g0030	Nitab4.5_0000682g0050	Nitab4.5_0000943g0050
	Nitab4.5_0001780g0110	NAC domain protein IPR003441 protein	1.74664	0.632388	-0.0398347	1.38581	1.29477	1.28037	-0.925455					Nitab4.5_0000408g0030	Nitab4.5_0002792g0060	Nitab4.5_0002314g0010	Nitab4.5_0001318g0050	Nitab4.5_0000690g0070	Nitab4.5_0000944g0100
	Nitab4.5_0003100g0030	NAC-domain transcription factor protein	8.78567	-0.756501	-1.14292	-1.02676	-0.862576	-0.334207	-1.50932					Nitab4.5_0000412g0020	Nitab4.5_0002796g0040	Nitab4.5_0002345g0080	Nitab4.5_0001320g0150	Nitab4.5_0000691g0010	Nitab4.5_0000956g0090
	Nitab4.5_0004208g0010	NAC domain protein IPR003441 protein	12.3289	0.537986	0.180169	-1.10751	-1.96624	-0.0448457	-0.474797					Nitab4.5_0000414g0120	Nitab4.5_0002822g0010	Nitab4.5_0002350g0050	Nitab4.5_0001331g0030	Nitab4.5_0000702g0130	Nitab4.5_0000957g0130
	Nitab4.5_0000111g0160	NAC domain protein IPR003441 protein	17.0402	0.792726	0.74575	-0.862056	-1.06145	0.0134578	-0.0966491					Nitab4.5_0000415g0070	Nitab4.5_0002823g0010	Nitab4.5_0002352g0120	Nitab4.5_0001345g0040	Nitab4.5_0000704g0060	Nitab4.5_0000957g0170
	Nitab4.5_0000568g0080	NAC domain protein protein	11.7368	0.597409	-0.667435	-0.561225	-1.12751	-0.591746	-0.839223					Nitab4.5_0000416g0140	Nitab4.5_0002838g0050	Nitab4.5_0002361g0080	Nitab4.5_0001356g0110	Nitab4.5_0000704g0080	Nitab4.5_0000960g0050
	Nitab4.5_0004300g0180	NAC domain transcription factor protein	10.6597	0.699949	0.66349	-0.917035	-1.77429	0.647503	-0.249965					Nitab4.5_0000418g0010	Nitab4.5_0002839g0010	Nitab4.5_0002369g0010	Nitab4.5_0001357g0030	Nitab4.5_0000705g0020	Nitab4.5_0000962g0100
	Nitab4.5_0000340g0090	NAC domain transcription factor protein	14.3536	-0.267913	-0.530096	-0.390528	-0.642959	-1.01402	-0.110036					Nitab4.5_0000420g0010	Nitab4.5_0002846g0010	Nitab4.5_0002378g0020	Nitab4.5_0001367g0070	Nitab4.5_0000705g0030	Nitab4.5_0000970g0040
	Nitab4.5_0013228g0020	NAC domain protein IPR003441 protein	14.1517	-0.290188	0.226909	-0.558233	-0.612944	-1.00466	-1.52927					Nitab4.5_0000420g0030	Nitab4.5_0002848g0070	Nitab4.5_0002400g0040	Nitab4.5_0001372g0020	Nitab4.5_0000705g0070	Nitab4.5_0000977g0030
	Nitab4.5_0000303g0090	NAC domain protein IPR003441 protein	2.14202	-1.27876	-1.41673	-1.46694	-1.41057	-1.25595	-1.95834					Nitab4.5_0000423g0060	Nitab4.5_0002860g0010	Nitab4.5_0002402g0010	Nitab4.5_0001380g0020	Nitab4.5_0000705g0120	Nitab4.5_0000977g0040
	Nitab4.5_0007206g0010	NAC domain protein IPR003441 protein	4.37381	0.472936	0.434717	-0.369092	-1.03202	-0.639332	-1.59977					Nitab4.5_0000425g0010	Nitab4.5_0002863g0040	Nitab4.5_0002410g0020	Nitab4.5_0001381g0190	Nitab4.5_0000706g0050	Nitab4.5_0000977g0070
	Nitab4.5_0014378g0010	NAC-domain transcription factor protein	5.55108	-0.195193	-0.599607	-1.09194	-1.27913	-0.0660129	-1.40617					Nitab4.5_0000425g0210	Nitab4.5_0002898g0030	Nitab4.5_0002429g0080	Nitab4.5_0001383g0030	Nitab4.5_0000712g0280	Nitab4.5_0000978g0100
OFP	Nitab4.5_0004277g0030	Plant-specific domain TIGR01568 family protein IPR006458 Protein of unknown function DUF623, plant	0	12.5158	11.8842	12.1359	12.1678	12.1729	11.7996					Nitab4.5_0000426g0040	Nitab4.5_0002902g0060	Nitab4.5_0002443g0040	Nitab4.5_0001393g0020	Nitab4.5_0000714g0070	Nitab4.5_0000983g0060
	Nitab4.5_0013107g0010	Plant-specific domain TIGR01568 family protein IPR006458 Protein of unknown function DUF623, plant	1.43637	2.04207	1.61922	1.18012	0.571485	0.535095	-0.0739378					Nitab4.5_0000426g0200	Nitab4.5_0002909g0010	Nitab4.5_0002458g0030	Nitab4.5_0001417g0100	Nitab4.5_0000715g0120	Nitab4.5_0000986g0060
Orphans	Nitab4.5_0000302g0110	Ethylene receptor IPR001789 Signal transduction response regulator, receiver region IPR014525 Signal transduction histidine kinase, hybrid-type, ethylene sensor IPR005467 Signal transduction histidine kinase, core	19.2541	3.41925	3.19939	0.0752711	-0.525546	0.141983	0.433126					Nitab4.5_0000426g0230	Nitab4.5_0002914g0140	Nitab4.5_0002466g0010	Nitab4.5_0001427g0090	Nitab4.5_0000715g0150	Nitab4.5_0000996g0010
	Nitab4.5_0000342g0270	Ethylene receptor IPR001789 Signal transduction response regulator, receiver region IPR014525 Signal transduction histidine kinase, hybrid-type, ethylene sensor IPR005467 Signal transduction histidine kinase, core	3.72612	3.24352	3.06331	-0.323663	-0.0938618	-0.0502571	-0.0962672					Nitab4.5_0000428g0090	Nitab4.5_0002948g0020	Nitab4.5_0002498g0070	Nitab4.5_0001437g0100	Nitab4.5_0000716g0250	Nitab4.5_0001000g0100
	Nitab4.5_0000368g0190	NA	1.32909	1.03588	0.214657	-0.27967	-0.682398	-1.1863	-0.203316					Nitab4.5_0000429g0030	Nitab4.5_0002980g0050	Nitab4.5_0002498g0080	Nitab4.5_0001439g0050	Nitab4.5_0000718g0310	Nitab4.5_0001000g0160
	Nitab4.5_0000649g0230	CONSTANS-like zinc finger protein IPR000315 Zinc finger, B-box	6.36802	2.11273	1.4881	0.666453	0.52661	0.274547	0.837962					Nitab4.5_0000430g0050	Nitab4.5_0003022g0060	Nitab4.5_0002532g0030	Nitab4.5_0001439g0100	Nitab4.5_0000722g0020	Nitab4.5_0001013g0090
	Nitab4.5_0000687g0110	Ethylene receptor IPR014525 Signal transduction histidine kinase, hybrid-type, ethylene sensor	23.4756	1.63522	1.44069	-0.393111	-0.233101	-0.611865	-0.46492					Nitab4.5_0000433g0070	Nitab4.5_0003030g0140	Nitab4.5_0002532g0040	Nitab4.5_0001453g0100	Nitab4.5_0000722g0030	Nitab4.5_0001014g0090
	Nitab4.5_0000856g0210	Ethylene receptor IPR001789 Signal transduction response regulator, receiver region IPR014525 Signal transduction histidine kinase, hybrid-type, ethylene sensor IPR005467 Signal transduction histidine kinase, core	13.3403	1.35656	1.23126	-0.191672	0.223425	0.506277	0.0654024					Nitab4.5_0000434g0190	Nitab4.5_0003033g0050	Nitab4.5_0002541g0050	Nitab4.5_0001464g0010	Nitab4.5_0000723g0160	Nitab4.5_0001019g0060
	Nitab4.5_0001658g0020	Multi-sensor hybrid histidine kinase IPR004358 Signal transduction histidine kinase-related protein, C-terminal	41.133	-2.06427	-1.27658	-0.449114	-0.984485	-2.14844	0.60498					Nitab4.5_0000436g0180	Nitab4.5_0003035g0030	Nitab4.5_0002546g0050	Nitab4.5_0001468g0070	Nitab4.5_0000723g0230	Nitab4.5_0001022g0030
	Nitab4.5_0002553g0030	Zinc finger protein CONSTANS-LIKE 1 IPR000315 Zinc finger, B-box	22	1.24345	0.601973	-0.110889	-0.793206	-1.93506	0.828537					Nitab4.5_0000437g0070	Nitab4.5_0003035g0040	Nitab4.5_0002548g0010	Nitab4.5_0001472g0080	Nitab4.5_0000728g0020	Nitab4.5_0001026g0060
	Nitab4.5_0002723g0010	Zinc finger protein CONSTANS-LIKE 3 IPR000315 Zinc finger, B-box	6.48913	2.51257	1.44727	0.34741	-0.780677	-1.1584	1.48286					Nitab4.5_0000437g0150	Nitab4.5_0003066g0030	Nitab4.5_0002548g0020	Nitab4.5_0001474g0050	Nitab4.5_0000729g0130	Nitab4.5_0001028g0120
	Nitab4.5_0003721g0020	Ethylene receptor IPR001789 Signal transduction response regulator, receiver region IPR014525 Signal transduction histidine kinase, hybrid-type, ethylene sensor IPR005467 Signal transduction histidine kinase, core	7.93663	4.45707	3.63665	-0.0481186	-0.438813	0.479371	0.332112					Nitab4.5_0000437g0160	Nitab4.5_0003079g0070	Nitab4.5_0002576g0030	Nitab4.5_0001477g0200	Nitab4.5_0000730g0120	Nitab4.5_0001028g0130
	Nitab4.5_0004114g0060	Constans-like protein IPR010402 CCT domain	2.19433	-1.89731	-1.2798	-0.111926	1.26985	-0.143546	-1.44595					Nitab4.5_0000439g0020	Nitab4.5_0003084g0040	Nitab4.5_0002590g0030	Nitab4.5_0001485g0200	Nitab4.5_0000732g0130	Nitab4.5_0001028g0150
	Nitab4.5_0004360g0050	CONSTANS-like zinc finger protein IPR000315 Zinc finger, B-box	8.20939	1.5245	0.459271	-0.3766	0.0420986	-1.16792	1.07041					Nitab4.5_0000440g0100	Nitab4.5_0003088g0020	Nitab4.5_0002600g0070	Nitab4.5_0001489g0010	Nitab4.5_0000733g0180	Nitab4.5_0001029g0080
	Nitab4.5_0004443g0040	Ethylene receptor IPR001789 Signal transduction response regulator, receiver region IPR014525 Signal transduction histidine kinase, hybrid-type, ethylene sensor IPR005467 Signal transduction histidine kinase, core	2.46524	3.79341	3.42336	-0.876063	0.199955	0.190828	0.0929907					Nitab4.5_0000441g0070	Nitab4.5_0003113g0050	Nitab4.5_0002605g0040	Nitab4.5_0001495g0070	Nitab4.5_0000737g0020	Nitab4.5_0001035g0010
	Nitab4.5_0004625g0020	CONSTANS-like zinc finger protein IPR000315 Zinc finger, B-box	9.25901	1.82528	0.87433	0.21062	0.729551	-0.315274	1.12212					Nitab4.5_0000443g0140	Nitab4.5_0003114g0110	Nitab4.5_0002623g0010	Nitab4.5_0001495g0130	Nitab4.5_0000737g0060	Nitab4.5_0001047g0100
	Nitab4.5_0006096g0020	Ethylene receptor IPR014525 Signal transduction histidine kinase, hybrid-type, ethylene sensor	15.62	1.66333	1.34097	-0.482095	-0.436839	-0.994738	-0.219502					Nitab4.5_0000444g0150	Nitab4.5_0003122g0050	Nitab4.5_0002637g0040	Nitab4.5_0001506g0090	Nitab4.5_0000737g0120	Nitab4.5_0001048g0050
	Nitab4.5_0012115g0010	Zinc finger protein CONSTANS-LIKE 3 IPR000315 Zinc finger, B-box	6.68481	3.06245	1.85944	0.362584	-1.33549	-0.825757	1.8606					Nitab4.5_0000445g0060	Nitab4.5_0003133g0040	Nitab4.5_0002649g0010	Nitab4.5_0001523g0030	Nitab4.5_0000738g0040	Nitab4.5_0001051g0160
	Nitab4.5_0012660g0030	Zinc finger protein CONSTANS-LIKE 3 IPR000315 Zinc finger, B-box	3.56402	1.68646	1.29595	0.417787	-1.20534	-4.15865	1.35227					Nitab4.5_0000445g0130	Nitab4.5_0003179g0060	Nitab4.5_0002660g0010	Nitab4.5_0001542g0020	Nitab4.5_0000742g0110	Nitab4.5_0001054g0040
	Nitab4.5_0012714g0010	Zinc finger protein CONSTANS-LIKE 3 IPR000315 Zinc finger, B-box	3.5208	1.49816	1.49466	0.5795	-0.862411	-2.5306	1.21179					Nitab4.5_0000446g0010	Nitab4.5_0003201g0020	Nitab4.5_0002664g0090	Nitab4.5_0001566g0010	Nitab4.5_0000744g0050	Nitab4.5_0001059g0090
	Nitab4.5_0015164g0010	CCT motif family protein IPR010402 CCT domain	52.5711	1.01191	0.420029	0.362775	0.772583	-0.0164076	0.606616					Nitab4.5_0000450g0070	Nitab4.5_0003212g0030	Nitab4.5_0002671g0110	Nitab4.5_0001568g0130	Nitab4.5_0000744g0140	Nitab4.5_0001065g0040
	Nitab4.5_0000502g0160	Histidine kinase 1 IPR004358 Signal transduction histidine kinase-related protein, C-terminal	1.61904	0.834725	1.25679	-0.0126656	-0.0979978	-0.952266	0.0946194					Nitab4.5_0000451g0050	Nitab4.5_0003228g0050	Nitab4.5_0002673g0040	Nitab4.5_0001572g0030	Nitab4.5_0000748g0100	Nitab4.5_0001072g0040
	Nitab4.5_0003953g0010	LIM domain protein IPR001781 Zinc finger, LIM-type	11.4428	-0.174692	0.307806	1.08641	1.3284	1.2506	-0.0503734					Nitab4.5_0000452g0070	Nitab4.5_0003247g0010	Nitab4.5_0002677g0040	Nitab4.5_0001579g0060	Nitab4.5_0000752g0030	Nitab4.5_0001076g0030
	Nitab4.5_0000244g0130	CONSTANS-like protein IPR010402 CCT domain	14.8908	-0.337199	-0.897	-0.688491	-2.98646	-4.65835	-0.325957					Nitab4.5_0000454g0040	Nitab4.5_0003259g0090	Nitab4.5_0002682g0060	Nitab4.5_0001581g0010	Nitab4.5_0000754g0250	Nitab4.5_0001088g0200
	Nitab4.5_0001892g0050	Multi-sensor hybrid histidine kinase IPR004358 Signal transduction histidine kinase-related protein, C-terminal	21.6157	-0.961051	-0.477565	-0.271583	-1.19476	-1.85051	0.819701					Nitab4.5_0000459g0060	Nitab4.5_0003261g0020	Nitab4.5_0002687g0010	Nitab4.5_0001585g0070	Nitab4.5_0000755g0010	Nitab4.5_0001091g0010
	Nitab4.5_0008348g0010	CONSTANS-like zinc finger protein IPR010402 CCT domain	3.96098	-0.798246	-0.244731	0.0502484	1.23956	1.4791	-0.0400602					Nitab4.5_0000460g0050	Nitab4.5_0003265g0010	Nitab4.5_0002695g0070	Nitab4.5_0001600g0120	Nitab4.5_0000756g0030	Nitab4.5_0001092g0010
	Nitab4.5_0000006g0530	CONSTANS-like zinc finger protein IPR010402 CCT domain	2.98308	-0.868113	-0.243708	-0.397215	1.13256	1.86535	-0.0208108					Nitab4.5_0000460g0100	Nitab4.5_0003298g0050	Nitab4.5_0002700g0120	Nitab4.5_0001617g0060	Nitab4.5_0000759g0150	Nitab4.5_0001094g0130
	Nitab4.5_0000935g0190	CONSTANS-like zinc finger protein IPR010402 CCT domain	0.806639	-0.127783	0.0564158	0.0382232	1.09129	2.54726	0.178201					Nitab4.5_0000462g0080	Nitab4.5_0003298g0060	Nitab4.5_0002700g0150	Nitab4.5_0001622g0050	Nitab4.5_0000759g0270	Nitab4.5_0001096g0030
PHD	Nitab4.5_0001371g0040	Chromodomain helicase DNA binding protein IPR019787 Zinc finger, PHD-finger	3.2532	1.03064	0.854319	0.698101	0.180239	0.860772	0.244932					Nitab4.5_0000462g0090	Nitab4.5_0003300g0080	Nitab4.5_0002720g0030	Nitab4.5_0001634g0060	Nitab4.5_0000760g0050	Nitab4.5_0001097g0100
	Nitab4.5_0013070g0030	BAH-PHD domain-containing protein (Fragment) IPR001025 Bromo adjacent region	8.44679	-0.626133	-0.264682	-0.566628	-0.338058	-0.836757	-1.25368					Nitab4.5_0000462g0110	Nitab4.5_0003309g0060	Nitab4.5_0002720g0110	Nitab4.5_0001642g0050	Nitab4.5_0000763g0030	Nitab4.5_0001099g0050
PLATZ	Nitab4.5_0003437g0010	Zinc-binding family protein IPR006734 Protein of unknown function DUF597	13.1984	-0.434457	-0.342487	-1.44151	-1.94722	-0.341248	-0.941994					Nitab4.5_0000463g0020	Nitab4.5_0003309g0070	Nitab4.5_0002733g0050	Nitab4.5_0001644g0100	Nitab4.5_0000764g0010	Nitab4.5_0001102g0030
	Nitab4.5_0009514g0070	Zinc-binding family protein IPR006734 Protein of unknown function DUF597	18.6975	0.382337	-0.444353	-0.636789	-1.74886	-0.957089	-0.255854					Nitab4.5_0000463g0070	Nitab4.5_0003313g0050	Nitab4.5_0002742g0040	Nitab4.5_0001645g0050	Nitab4.5_0000764g0020	Nitab4.5_0001110g0090
	Nitab4.5_0000256g0150	Zinc-binding family protein IPR006734 Protein of unknown function DUF597	43.0024	0.333738	0.168949	-0.519197	-0.79298	-1.17735	0.0867895					Nitab4.5_0000463g0100	Nitab4.5_0003324g0100	Nitab4.5_0002744g0030	Nitab4.5_0001652g0100	Nitab4.5_0000766g0050	Nitab4.5_0001119g0010
	Nitab4.5_0006434g0040	Zinc-binding family protein IPR006734 Protein of unknown function DUF597	41.1268	-0.482367	-0.282766	-0.603084	-0.644673	-1.38372	-0.263747					Nitab4.5_0000466g0010	Nitab4.5_0003328g0020	Nitab4.5_0002762g0010	Nitab4.5_0001654g0010	Nitab4.5_0000766g0070	Nitab4.5_0001119g0040
	Nitab4.5_0008566g0080	Zinc-binding family protein IPR006734 Protein of unknown function DUF597	79.9674	-0.545908	-0.477776	-0.519503	-0.70535	-1.34051	0.0638274					Nitab4.5_0000468g0270	Nitab4.5_0003374g0070	Nitab4.5_0002771g0030	Nitab4.5_0001658g0030	Nitab4.5_0000769g0010	Nitab4.5_0001128g0030
	Nitab4.5_0008743g0010	Zinc-binding family protein IPR006734 Protein of unknown function DUF597	21.7854	0.133091	0.185931	-0.423727	-0.495432	-1.25641	-0.480099					Nitab4.5_0000469g0040	Nitab4.5_0003402g0050	Nitab4.5_0002810g0030	Nitab4.5_0001659g0030	Nitab4.5_0000769g0190	Nitab4.5_0001134g0090
Pseudo ARR-B	Nitab4.5_0000575g0010	Pseudo response regulator IPR010402 CCT domain	25.0455	-1.03085	-0.782269	-0.206372	0.27224	0.0920016	-0.516738					Nitab4.5_0000469g0080	Nitab4.5_0003407g0030	Nitab4.5_0002839g0010	Nitab4.5_0001662g0020	Nitab4.5_0000770g0100	Nitab4.5_0001142g0030
	Nitab4.5_0001248g0010	Pseudo response regulator IPR010402 CCT domain	21.6394	-1.60335	-1.32829	-0.346877	0.257231	0.0834968	-0.854148					Nitab4.5_0000470g0170	Nitab4.5_0003418g0030	Nitab4.5_0002886g0110	Nitab4.5_0001668g0150	Nitab4.5_0000782g0010	Nitab4.5_0001147g0060
	Nitab4.5_0000319g0050	Pseudo response regulator IPR001789 Signal transduction response regulator, receiver region	4.79757	-0.0940694	-0.641988	0.0578484	1.43348	0.34211	0.590782					Nitab4.5_0000470g0190	Nitab4.5_0003436g0010	Nitab4.5_0002887g0100	Nitab4.5_0001672g0130	Nitab4.5_0000782g0150	Nitab4.5_0001149g0030
	Nitab4.5_0001211g0280	Timing of CAB expression-like	2.2433	0.00515689	0.570834	0.222626	1.7501	2.68123	0.41963					Nitab4.5_0000470g0230	Nitab4.5_0003436g0020	Nitab4.5_0002906g0080	Nitab4.5_0001674g0010	Nitab4.5_0000783g0110	Nitab4.5_0001164g0090
	Nitab4.5_0004249g0020	Pseudo-response regulator 9 IPR001789 Signal transduction response regulator, receiver region	30.8523	0.316266	-0.0661145	-0.222179	-1.06614	-3.67618	-0.00104627					Nitab4.5_0000472g0330	Nitab4.5_0003470g0060	Nitab4.5_0002920g0050	Nitab4.5_0001675g0050	Nitab4.5_0000783g0240	Nitab4.5_0001167g0030
	Nitab4.5_0005900g0090	Timing of CAB expression-like	0.48803	1.09313	1.46967	0.911894	2.32872	3.98587	1.05253					Nitab4.5_0000476g0080	Nitab4.5_0003495g0040	Nitab4.5_0002946g0040	Nitab4.5_0001675g0080	Nitab4.5_0000785g0170	Nitab4.5_0001180g0220
	Nitab4.5_0010809g0020	Pseudo response regulator IPR001789 Signal transduction response regulator, receiver region	6.06892	-0.415149	-0.46972	0.0693782	2.10904	1.57226	1.11577					Nitab4.5_0000476g0210	Nitab4.5_0003548g0040	Nitab4.5_0002949g0040	Nitab4.5_0001683g0050	Nitab4.5_0000786g0230	Nitab4.5_0001183g0090
	Nitab4.5_0002053g0060	Pseudo-response regulator 9 IPR001789 Signal transduction response regulator, receiver region	34.4611	0.155556	-0.259544	-0.00352929	0.0617456	-1.93915	-0.0434484					Nitab4.5_0000477g0200	Nitab4.5_0003554g0020	Nitab4.5_0002956g0080	Nitab4.5_0001688g0070	Nitab4.5_0000787g0200	Nitab4.5_0001186g0050
RWP-RK	Nitab4.5_0000783g0180	Nodule inception protein (Fragment) IPR003035 Plant regulator RWP-RK	7.96597	-2.53155	-1.00448	0.668177	-0.882053	-0.323335	0.878106					Nitab4.5_0000483g0270	Nitab4.5_0003571g0010	Nitab4.5_0002971g0010	Nitab4.5_0001690g0020	Nitab4.5_0000788g0010	Nitab4.5_0001187g0070
	Nitab4.5_0011405g0010	Nodule inception protein (Fragment) IPR003035 Plant regulator RWP-RK	13.5136	-1.07275	-0.809778	-0.605843	-1.06892	-1.45551	-0.320276					Nitab4.5_0000488g0010	Nitab4.5_0003573g0020	Nitab4.5_0002980g0050	Nitab4.5_0001700g0060	Nitab4.5_0000792g0050	Nitab4.5_0001187g0080
	Nitab4.5_0002793g0050	Nodule inception protein (Fragment) IPR003035 Plant regulator RWP-RK	12.6488	-0.817026	-0.642974	-0.488774	-0.846263	-1.07519	-0.275917					Nitab4.5_0000488g0030	Nitab4.5_0003587g0010	Nitab4.5_0002989g0010	Nitab4.5_0001707g0050	Nitab4.5_0000795g0060	Nitab4.5_0001190g0010
	Nitab4.5_0004246g0040	Ubiquitin carboxyl-terminal hydrolase family protein expressed IPR001394 Peptidase C19, ubiquitin carboxyl-terminal hydrolase 2	17.7888	-0.325967	-0.244006	-0.472958	-0.203707	-1.45711	-0.369704					Nitab4.5_0000491g0110	Nitab4.5_0003588g0050	Nitab4.5_0003011g0040	Nitab4.5_0001707g0150	Nitab4.5_0000798g0130	Nitab4.5_0001194g0010
	Nitab4.5_0009395g0020	Nodule inception protein (Fragment) IPR003035 Plant regulator RWP-RK	43.6512	-0.547889	-0.254441	-0.0776082	-0.662117	-1.4369	-0.304698					Nitab4.5_0000492g0020	Nitab4.5_0003676g0080	Nitab4.5_0003011g0080	Nitab4.5_0001725g0180	Nitab4.5_0000800g0030	Nitab4.5_0001194g0040
SBP	Nitab4.5_0000638g0040	Squamosa promoter binding-like protein IPR004333 Transcription factor, SBP-box	1.5593	2.10642	2.22052	-0.351354	0.779693	0.391083	-0.308624					Nitab4.5_0000492g0070	Nitab4.5_0003715g0060	Nitab4.5_0003012g0060	Nitab4.5_0001727g0170	Nitab4.5_0000801g0040	Nitab4.5_0001194g0100
	Nitab4.5_0000861g0050	Squamosa promoter-binding-like protein 11 IPR004333 Transcription factor, SBP-box	14.3486	1.10809	0.536537	0.219665	0.0731507	0.193493	0.495536					Nitab4.5_0000495g0090	Nitab4.5_0003721g0020	Nitab4.5_0003013g0020	Nitab4.5_0001736g0020	Nitab4.5_0000803g0050	Nitab4.5_0001202g0030
	Nitab4.5_0001752g0040	Squamosa promoter binding-like protein IPR004333 Transcription factor, SBP-box	0.326499	3.672	2.81931	2.35694	2.25172	1.51036	1.26886					Nitab4.5_0000496g0150	Nitab4.5_0003769g0040	Nitab4.5_0003029g0020	Nitab4.5_0001736g0040	Nitab4.5_0000807g0110	Nitab4.5_0001208g0090
	Nitab4.5_0000991g0020	Squamosa promoter-binding protein IPR004333 Transcription factor, SBP-box	0.974267	0.16355	0.719114	1.0012	1.71355	1.86736	-0.0170124					Nitab4.5_0000496g0160	Nitab4.5_0003779g0090	Nitab4.5_0003032g0010	Nitab4.5_0001739g0070	Nitab4.5_0000812g0020	Nitab4.5_0001225g0010
SET	Nitab4.5_0000040g0070	SET domain protein IPR011990 Tetratricopeptide-like helical	2.46487	0.0105936	0.472435	1.12807	0.391959	0.781848	-0.797187					Nitab4.5_0000496g0170	Nitab4.5_0003779g0120	Nitab4.5_0003040g0030	Nitab4.5_0001748g0050	Nitab4.5_0000814g0020	Nitab4.5_0001234g0010
Sigma70-like	Nitab4.5_0000021g0930	RNA polymerase sigma-70 factor IPR013325 RNA polymerase sigma factor, region 2	1.43353	1.70571	0.177456	0.540446	0.0964732	0.457237	0.0879756					Nitab4.5_0000497g0200	Nitab4.5_0003802g0020	Nitab4.5_0003042g0040	Nitab4.5_0001750g0050	Nitab4.5_0000818g0010	Nitab4.5_0001237g0040
	Nitab4.5_0005545g0050	RNA polymerase sigma-70 factor IPR013325 RNA polymerase sigma factor, region 2	0.74659	1.446	0.011618	0.309399	0.235966	0.0870913	-0.117617					Nitab4.5_0000498g0040	Nitab4.5_0003811g0100	Nitab4.5_0003076g0080	Nitab4.5_0001754g0010	Nitab4.5_0000824g0040	Nitab4.5_0001243g0040
	Nitab4.5_0002589g0060	RNA polymerase sigma factor IPR013325 RNA polymerase sigma factor, region 2	5.55945	0.117352	-0.492218	-0.756253	-1.53974	-2.54439	-0.575917					Nitab4.5_0000498g0090	Nitab4.5_0003818g0040	Nitab4.5_0003100g0030	Nitab4.5_0001758g0020	Nitab4.5_0000833g0060	Nitab4.5_0001244g0030
	Nitab4.5_0014729g0010	RNA polymerase sigma factor IPR013325 RNA polymerase sigma factor, region 2	4.20624	0.963513	-0.0706432	-0.501491	-2.22593	-2.63645	0.232757					Nitab4.5_0000500g0020	Nitab4.5_0003828g0030	Nitab4.5_0003102g0020	Nitab4.5_0001762g0080	Nitab4.5_0000837g0080	Nitab4.5_0001244g0100
SNF2	Nitab4.5_0005320g0010	Chromodomain helicase DNA-binding protein 4 IPR000953 Chromo domain	0.789107	2.1905	1.50691	1.51425	1.18084	1.39113	0.9119					Nitab4.5_0000500g0210	Nitab4.5_0003848g0020	Nitab4.5_0003113g0050	Nitab4.5_0001778g0040	Nitab4.5_0000841g0070	Nitab4.5_0001256g0060
	Nitab4.5_0006561g0040	Ribonuclease 3-like protein 3 IPR000999 Ribonuclease III	18.6047	0.475532	1.1534	-0.38296	-0.684984	-0.297078	-0.280005					Nitab4.5_0000501g0070	Nitab4.5_0003848g0030	Nitab4.5_0003117g0060	Nitab4.5_0001780g0120	Nitab4.5_0000842g0010	Nitab4.5_0001257g0060
SRS	Nitab4.5_0007812g0060	Stylish IPR007818 Protein of unknown function DUF702	12.5196	-0.217743	0.137092	-0.819129	-0.924227	-1.11216	-1.10563					Nitab4.5_0000502g0090	Nitab4.5_0003858g0090	Nitab4.5_0003149g0030	Nitab4.5_0001787g0020	Nitab4.5_0000851g0020	Nitab4.5_0001270g0120
SWI/SNF-BAF60b	Nitab4.5_0001489g0010	Translation machinery associated protein IPR001950 Translation initiation factor SUI1	50.6387	-1.76606	-1.00234	-1.33233	-1.56956	-2.35577	-2.39101					Nitab4.5_0000505g0180	Nitab4.5_0003883g0030	Nitab4.5_0003207g0080	Nitab4.5_0001789g0030	Nitab4.5_0000852g0060	Nitab4.5_0001284g0090
TAZ	Nitab4.5_0000284g0090	Speckle-type POZ protein IPR000197 Zinc finger, TAZ-type	10.2763	0.93324	1.22978	1.25016	0.764744	1.43996	1.60217					Nitab4.5_0000506g0110	Nitab4.5_0003884g0010	Nitab4.5_0003244g0020	Nitab4.5_0001801g0080	Nitab4.5_0000856g0190	Nitab4.5_0001284g0120
	Nitab4.5_0000036g0030	Speckle-type POZ protein IPR000197 Zinc finger, TAZ-type	5.06795	0.961819	0.898108	0.845428	0.712185	1.43942	1.49897					Nitab4.5_0000508g0110	Nitab4.5_0003885g0100	Nitab4.5_0003247g0010	Nitab4.5_0001807g0080	Nitab4.5_0000858g0060	Nitab4.5_0001288g0190
	Nitab4.5_0001812g0080	Speckle-type POZ protein IPR000197 Zinc finger, TAZ-type	3.99217	0.790844	0.180977	0.176069	0.667084	1.24783	-0.754244					Nitab4.5_0000508g0190	Nitab4.5_0003893g0030	Nitab4.5_0003249g0040	Nitab4.5_0001820g0070	Nitab4.5_0000859g0200	Nitab4.5_0001292g0050
	Nitab4.5_0007909g0010	Speckle-type POZ protein IPR000197 Zinc finger, TAZ-type	5.77484	-0.4226	-0.142687	0.0695792	0.259571	1.40775	-0.436164					Nitab4.5_0000512g0220	Nitab4.5_0003901g0020	Nitab4.5_0003251g0040	Nitab4.5_0001831g0080	Nitab4.5_0000862g0040	Nitab4.5_0001294g0010
TCP	Nitab4.5_0003077g0060	Transcription factor CYCLOIDEA (Fragment) IPR005333 Transcription factor, TCP	15.7513	-1.16437	-0.422845	0.206506	-0.339985	-0.825936	0.775851					Nitab4.5_0000512g0230	Nitab4.5_0003930g0030	Nitab4.5_0003259g0090	Nitab4.5_0001856g0060	Nitab4.5_0000863g0200	Nitab4.5_0001295g0040
	Nitab4.5_0011777g0010	TCP family transcription factor IPR005333 Transcription factor, TCP	28.5467	-1.00326	-0.504172	0.130569	0.570293	0.637807	-0.145347					Nitab4.5_0000515g0010	Nitab4.5_0003985g0010	Nitab4.5_0003274g0050	Nitab4.5_0001884g0050	Nitab4.5_0000868g0010	Nitab4.5_0001302g0010
Tify	Nitab4.5_0002046g0020	Protein TIFY 6B IPR010399 Tify	10.9758	1.17343	0.917554	0.391171	0.162474	0.84487	0.929972					Nitab4.5_0000516g0110	Nitab4.5_0003985g0020	Nitab4.5_0003284g0010	Nitab4.5_0001887g0050	Nitab4.5_0000870g0060	Nitab4.5_0001310g0030
	Nitab4.5_0005246g0010	Protein TIFY 5A IPR018467 CCT domain-like	1.88164	2.142	1.29449	-1.30389	0.26222	2.19026	2.50154					Nitab4.5_0000519g0150	Nitab4.5_0003995g0040	Nitab4.5_0003284g0040	Nitab4.5_0001889g0140	Nitab4.5_0000871g0040	Nitab4.5_0001317g0050
	Nitab4.5_0011669g0010	Protein TIFY 8 IPR010399 Tify	14.8641	-1.31072	-0.780822	-0.0980879	0.121881	-0.148509	0.120902					Nitab4.5_0000521g0070	Nitab4.5_0004009g0040	Nitab4.5_0003295g0130	Nitab4.5_0001892g0050	Nitab4.5_0000871g0060	Nitab4.5_0001318g0050
	Nitab4.5_0006232g0010	Jasmonate ZIM domain 2 IPR010399 Tify	11.0559	0.872949	1.26381	-0.587709	-0.15408	1.31987	0.857577					Nitab4.5_0000522g0150	Nitab4.5_0004010g0070	Nitab4.5_0003299g0010	Nitab4.5_0001894g0040	Nitab4.5_0000874g0110	Nitab4.5_0001323g0050
	Nitab4.5_0000201g0130	Pto-responsive gene 1 protein IPR010399 Tify	5.34251	-0.471665	-0.285987	-0.626747	-1.42367	-0.761412	0.51253					Nitab4.5_0000524g0100	Nitab4.5_0004026g0020	Nitab4.5_0003313g0050	Nitab4.5_0001898g0080	Nitab4.5_0000876g0040	Nitab4.5_0001324g0080
	Nitab4.5_0004234g0080	Jasmonate ZIM-domain protein 1 IPR010399 Tify	23.433	0.301736	0.474883	-0.46092	-0.00368227	1.28326	0.49836					Nitab4.5_0000525g0290	Nitab4.5_0004030g0050	Nitab4.5_0003324g0100	Nitab4.5_0001912g0020	Nitab4.5_0000880g0040	Nitab4.5_0001329g0040
	Nitab4.5_0000787g0240	Protein TIFY 3A IPR010399 Tify	0	0	0	11.3152	9.75532	12.3676	13.3123					Nitab4.5_0000527g0090	Nitab4.5_0004055g0010	Nitab4.5_0003328g0120	Nitab4.5_0001921g0030	Nitab4.5_0000881g0110	Nitab4.5_0001337g0010
Trihelix	Nitab4.5_0000165g0090	Os01g0318400 protein (Fragment)	6.63571	1.08415	0.745111	0.0596104	0.085143	0.161993	0.373237					Nitab4.5_0000527g0200	Nitab4.5_0004070g0030	Nitab4.5_0003347g0030	Nitab4.5_0001922g0090	Nitab4.5_0000883g0020	Nitab4.5_0001357g0030
	Nitab4.5_0000680g0050	Os01g0318400 protein (Fragment)	18.0794	1.40609	0.952382	-0.378479	-1.25228	-2.11194	-0.899435					Nitab4.5_0000527g0230	Nitab4.5_0004097g0050	Nitab4.5_0003360g0050	Nitab4.5_0001925g0250	Nitab4.5_0000884g0010	Nitab4.5_0001366g0090
WRKY	Nitab4.5_0000171g0190	WRKY transcription factor 6 IPR003657 DNA-binding WRKY	10.6051	-1.78293	-0.0132547	-0.321573	-1.10521	-0.725222	-1.72379					Nitab4.5_0000533g0080	Nitab4.5_0004106g0010	Nitab4.5_0003394g0020	Nitab4.5_0001933g0080	Nitab4.5_0000884g0020	Nitab4.5_0001372g0020
	Nitab4.5_0000568g0260	Cell division protein kinase 13 IPR002290 Serine_threonine protein kinase	5.87058	1.24928	0.672352	0.391763	0.211641	-0.0156857	0.0167353					Nitab4.5_0000533g0150	Nitab4.5_0004123g0030	Nitab4.5_0003401g0080	Nitab4.5_0001944g0030	Nitab4.5_0000884g0030	Nitab4.5_0001376g0060
	Nitab4.5_0001591g0020	WRKY transcription factor-c IPR003657 DNA-binding WRKY	9.88946	1.60497	0.924734	-0.0467011	-0.0027325	-0.454952	-0.264322					Nitab4.5_0000535g0120	Nitab4.5_0004153g0040	Nitab4.5_0003402g0050	Nitab4.5_0001952g0110	Nitab4.5_0000884g0090	Nitab4.5_0001384g0050
	Nitab4.5_0002568g0030	WRKY transcription factor 2 IPR003657 DNA-binding WRKY	4.29207	2.54041	1.69222	-0.726892	-0.460199	0.266854	0.690368					Nitab4.5_0000535g0130	Nitab4.5_0004168g0140	Nitab4.5_0003417g0010	Nitab4.5_0001952g0140	Nitab4.5_0000900g0050	Nitab4.5_0001397g0010
	Nitab4.5_0003473g0040	WRKY transcription factor 6 IPR003657 DNA-binding WRKY	9.34502	-1.73398	0.128125	-0.524953	-1.08167	-0.682574	-2.36921					Nitab4.5_0000536g0010	Nitab4.5_0004181g0040	Nitab4.5_0003419g0070	Nitab4.5_0001952g0250	Nitab4.5_0000900g0150	Nitab4.5_0001413g0040
	Nitab4.5_0007342g0050	WRKY transcription factor 3 IPR003657 DNA-binding WRKY	12.7346	-1.02782	-0.862436	-0.184141	-0.0666896	-0.319406	-0.611665					Nitab4.5_0000539g0020	Nitab4.5_0004209g0030	Nitab4.5_0003436g0020	Nitab4.5_0001955g0110	Nitab4.5_0000905g0130	Nitab4.5_0001427g0140
	Nitab4.5_0012161g0030	WRKY transcription factor 2 IPR003657 DNA-binding WRKY	6.17741	2.32267	1.42748	-0.732956	-0.131635	0.160535	-0.369156					Nitab4.5_0000548g0010	Nitab4.5_0004217g0030	Nitab4.5_0003437g0010	Nitab4.5_0001957g0020	Nitab4.5_0000907g0080	Nitab4.5_0001437g0220
	Nitab4.5_0014092g0020	WRKY transcription factor 19 IPR003657 DNA-binding WRKY	3.3942	1.73276	-0.308172	-0.165599	-0.118928	0.463811	-0.0116875					Nitab4.5_0000551g0010	Nitab4.5_0004261g0030	Nitab4.5_0003449g0080	Nitab4.5_0001968g0130	Nitab4.5_0000907g0090	Nitab4.5_0001439g0050
	Nitab4.5_0000046g0020	WRKY transcription factor 1 IPR003657 DNA-binding WRKY	38.5378	0.985766	1.03076	-0.24103	-0.031915	0.311615	0.00566164					Nitab4.5_0000552g0060	Nitab4.5_0004270g0010	Nitab4.5_0003465g0080	Nitab4.5_0001970g0020	Nitab4.5_0000919g0070	Nitab4.5_0001441g0060
	Nitab4.5_0000048g0080	WRKY transcription factor 6 IPR003657 DNA-binding WRKY	29.2931	0.852891	1.61788	-0.223553	-0.669091	0.0905148	-0.474112					Nitab4.5_0000552g0070	Nitab4.5_0004271g0060	Nitab4.5_0003495g0010	Nitab4.5_0001970g0070	Nitab4.5_0000919g0090	Nitab4.5_0001453g0100
	Nitab4.5_0000381g0130	WRKY transcription factor 6 IPR003657 DNA-binding WRKY	13.1268	0.338127	1.25377	-1.12731	-1.66923	-1.15657	-1.50288					Nitab4.5_0000555g0140	Nitab4.5_0004286g0050	Nitab4.5_0003511g0010	Nitab4.5_0001982g0120	Nitab4.5_0000926g0140	Nitab4.5_0001454g0170
	Nitab4.5_0002758g0040	WRKY transcription factor 6 IPR003657 DNA-binding WRKY	42.3264	0.452938	1.25331	-0.501563	-0.648063	-0.122295	-0.636954					Nitab4.5_0000555g0150	Nitab4.5_0004422g0030	Nitab4.5_0003512g0020	Nitab4.5_0001999g0030	Nitab4.5_0000932g0020	Nitab4.5_0001464g0010
	Nitab4.5_0006656g0060	WRKY transcription factor-30 IPR003657 DNA-binding WRKY	4.74295	-0.445994	-1.51781	-0.239686	-0.265781	0.0228918	-0.805905					Nitab4.5_0000555g0200	Nitab4.5_0004443g0040	Nitab4.5_0003513g0010	Nitab4.5_0002027g0070	Nitab4.5_0000933g0020	Nitab4.5_0001464g0020
	Nitab4.5_0000184g0280	WRKY transcription factor 16 IPR003657 DNA-binding WRKY	4.50283	0.0606319	0.156651	-1.80022	-1.44438	-0.884712	-1.50263					Nitab4.5_0000562g0020	Nitab4.5_0004448g0010	Nitab4.5_0003519g0010	Nitab4.5_0002050g0080	Nitab4.5_0000933g0030	Nitab4.5_0001468g0070
	Nitab4.5_0000274g0070	WRKY transcription factor 73 IPR003657 DNA-binding WRKY	1.16256	-0.570456	-0.18821	1.43982	0.932764	0.284391	0.812289					Nitab4.5_0000562g0110	Nitab4.5_0004528g0020	Nitab4.5_0003524g0020	Nitab4.5_0002064g0040	Nitab4.5_0000934g0150	Nitab4.5_0001472g0080
	Nitab4.5_0007375g0020	WRKY transcription factor IPR003657 DNA-binding WRKY	7.66935	-0.377447	-0.251915	-0.466787	-1.60043	-0.872249	-0.259045					Nitab4.5_0000564g0150	Nitab4.5_0004621g0030	Nitab4.5_0003571g0010	Nitab4.5_0002066g0110	Nitab4.5_0000935g0190	Nitab4.5_0001474g0050
	Nitab4.5_0007691g0010	WRKY transcription factor 16 IPR003657 DNA-binding WRKY	14.723	-0.115312	0.359553	-0.618968	-1.05777	-0.929298	-0.904019					Nitab4.5_0000564g0230	Nitab4.5_0004644g0070	Nitab4.5_0003603g0100	Nitab4.5_0002093g0010	Nitab4.5_0000939g0020	Nitab4.5_0001478g0040
	Nitab4.5_0008114g0010	WRKY transcription factor 29 IPR003657 DNA-binding WRKY	5.0554	0.879113	0.318059	0.754815	0.777272	1.74407	0.95749					Nitab4.5_0000565g0060	Nitab4.5_0004679g0080	Nitab4.5_0003610g0020	Nitab4.5_0002097g0120	Nitab4.5_0000941g0150	Nitab4.5_0001485g0200
	Nitab4.5_0010695g0060	WRKY transcription factor 23 IPR003657 DNA-binding WRKY	10.6599	-0.0146477	-0.132148	-0.446232	-0.879912	-1.57834	-0.0607409					Nitab4.5_0000565g0130	Nitab4.5_0004694g0040	Nitab4.5_0003626g0120	Nitab4.5_0002113g0180	Nitab4.5_0000943g0050	Nitab4.5_0001489g0010
	Nitab4.5_0000223g0340	WRKY transcription factor-30 IPR003657 DNA-binding WRKY	9.24917	-0.243827	-1.06571	-0.00533133	-0.0169572	-0.585046	-1.33974					Nitab4.5_0000566g0010	Nitab4.5_0004709g0010	Nitab4.5_0003654g0010	Nitab4.5_0002114g0130	Nitab4.5_0000956g0030	Nitab4.5_0001492g0060
	Nitab4.5_0000286g0080	WRKY transcription factor 16 IPR003657 DNA-binding WRKY	17.3529	-0.544992	0.28269	-0.942265	-0.672161	-0.66935	-1.22381					Nitab4.5_0000566g0190	Nitab4.5_0004710g0010	Nitab4.5_0003658g0010	Nitab4.5_0002117g0040	Nitab4.5_0000959g0110	Nitab4.5_0001493g0040
	Nitab4.5_0001000g0160	WRKY transcription factor 16 IPR003657 DNA-binding WRKY	9.5315	-0.69867	-0.0331128	-0.530783	-1.14968	-0.597097	-1.45237					Nitab4.5_0000566g0280	Nitab4.5_0004756g0030	Nitab4.5_0003715g0060	Nitab4.5_0002120g0050	Nitab4.5_0000960g0140	Nitab4.5_0001495g0130
	Nitab4.5_0007099g0040	WRKY transcription factor-30 IPR003657 DNA-binding WRKY	7.7062	-0.0747953	-1.17039	-0.226915	0.156825	-0.683132	-1.38185					Nitab4.5_0000568g0010	Nitab4.5_0004756g0060	Nitab4.5_0003726g0100	Nitab4.5_0002137g0140	Nitab4.5_0000961g0130	Nitab4.5_0001497g0030
zf-HD	Nitab4.5_0002224g0080	Zinc finger-homeodomain protein 1 (Fragment) IPR006456 ZF-HD homeobox protein Cys_His-rich dimerisation region	0.780474	1.07453	0.678841	2.27514	2.3949	1.83936	1.27003					Nitab4.5_0000568g0210	Nitab4.5_0004773g0010	Nitab4.5_0003734g0040	Nitab4.5_0002138g0120	Nitab4.5_0000965g0040	Nitab4.5_0001509g0030
														Nitab4.5_0000568g0260	Nitab4.5_0004783g0020	Nitab4.5_0003743g0010	Nitab4.5_0002145g0010	Nitab4.5_0000970g0040	Nitab4.5_0001519g0040
														Nitab4.5_0000570g0190	Nitab4.5_0004814g0010	Nitab4.5_0003763g0030	Nitab4.5_0002157g0130	Nitab4.5_0000973g0030	Nitab4.5_0001523g0010
														Nitab4.5_0000574g0090	Nitab4.5_0004821g0020	Nitab4.5_0003773g0020	Nitab4.5_0002162g0230	Nitab4.5_0000977g0110	Nitab4.5_0001529g0020
														Nitab4.5_0000574g0130	Nitab4.5_0004854g0010	Nitab4.5_0003779g0120	Nitab4.5_0002168g0010	Nitab4.5_0000978g0100	Nitab4.5_0001551g0070
														Nitab4.5_0000574g0200	Nitab4.5_0004861g0040	Nitab4.5_0003794g0080	Nitab4.5_0002177g0170	Nitab4.5_0000980g0160	Nitab4.5_0001554g0070
														Nitab4.5_0000575g0010	Nitab4.5_0004955g0020	Nitab4.5_0003806g0010	Nitab4.5_0002186g0060	Nitab4.5_0000980g0350	Nitab4.5_0001556g0040
														Nitab4.5_0000578g0120	Nitab4.5_0004957g0010	Nitab4.5_0003818g0040	Nitab4.5_0002188g0020	Nitab4.5_0000983g0060	Nitab4.5_0001558g0060
														Nitab4.5_0000578g0200	Nitab4.5_0004989g0030	Nitab4.5_0003822g0010	Nitab4.5_0002201g0040	Nitab4.5_0000991g0020	Nitab4.5_0001559g0010
														Nitab4.5_0000582g0240	Nitab4.5_0004992g0010	Nitab4.5_0003828g0030	Nitab4.5_0002214g0050	Nitab4.5_0001000g0100	Nitab4.5_0001565g0040
														Nitab4.5_0000583g0120	Nitab4.5_0005031g0060	Nitab4.5_0003848g0020	Nitab4.5_0002221g0060	Nitab4.5_0001002g0070	Nitab4.5_0001572g0030
														Nitab4.5_0000583g0170	Nitab4.5_0005049g0020	Nitab4.5_0003858g0090	Nitab4.5_0002224g0080	Nitab4.5_0001013g0090	Nitab4.5_0001573g0010
														Nitab4.5_0000587g0070	Nitab4.5_0005116g0010	Nitab4.5_0003865g0080	Nitab4.5_0002241g0020	Nitab4.5_0001014g0090	Nitab4.5_0001573g0060
														Nitab4.5_0000588g0040	Nitab4.5_0005133g0050	Nitab4.5_0003885g0020	Nitab4.5_0002251g0110	Nitab4.5_0001019g0060	Nitab4.5_0001579g0060
														Nitab4.5_0000588g0260	Nitab4.5_0005144g0010	Nitab4.5_0003906g0010	Nitab4.5_0002252g0030	Nitab4.5_0001026g0060	Nitab4.5_0001580g0030
														Nitab4.5_0000593g0240	Nitab4.5_0005157g0010	Nitab4.5_0003912g0090	Nitab4.5_0002257g0010	Nitab4.5_0001029g0080	Nitab4.5_0001594g0020
														Nitab4.5_0000595g0060	Nitab4.5_0005164g0030	Nitab4.5_0003934g0060	Nitab4.5_0002259g0010	Nitab4.5_0001036g0040	Nitab4.5_0001604g0120
														Nitab4.5_0000595g0100	Nitab4.5_0005191g0020	Nitab4.5_0003937g0020	Nitab4.5_0002259g0060	Nitab4.5_0001036g0070	Nitab4.5_0001606g0070
														Nitab4.5_0000596g0020	Nitab4.5_0005195g0040	Nitab4.5_0003953g0010	Nitab4.5_0002282g0040	Nitab4.5_0001040g0120	Nitab4.5_0001612g0070
														Nitab4.5_0000597g0020	Nitab4.5_0005226g0010	Nitab4.5_0003969g0060	Nitab4.5_0002282g0120	Nitab4.5_0001041g0130	Nitab4.5_0001617g0020
														Nitab4.5_0000600g0050	Nitab4.5_0005259g0020	Nitab4.5_0003981g0080	Nitab4.5_0002283g0030	Nitab4.5_0001043g0040	Nitab4.5_0001617g0060
														Nitab4.5_0000600g0060	Nitab4.5_0005320g0010	Nitab4.5_0003983g0070	Nitab4.5_0002286g0090	Nitab4.5_0001047g0100	Nitab4.5_0001622g0050
														Nitab4.5_0000600g0080	Nitab4.5_0005340g0050	Nitab4.5_0003995g0030	Nitab4.5_0002291g0030	Nitab4.5_0001048g0050	Nitab4.5_0001624g0040
														Nitab4.5_0000601g0130	Nitab4.5_0005344g0020	Nitab4.5_0004013g0010	Nitab4.5_0002308g0020	Nitab4.5_0001054g0040	Nitab4.5_0001640g0020
														Nitab4.5_0000602g0080	Nitab4.5_0005359g0030	Nitab4.5_0004013g0020	Nitab4.5_0002308g0030	Nitab4.5_0001057g0030	Nitab4.5_0001659g0030
														Nitab4.5_0000604g0080	Nitab4.5_0005382g0020	Nitab4.5_0004027g0010	Nitab4.5_0002318g0030	Nitab4.5_0001068g0010	Nitab4.5_0001662g0020
														Nitab4.5_0000604g0110	Nitab4.5_0005400g0020	Nitab4.5_0004036g0010	Nitab4.5_0002329g0110	Nitab4.5_0001070g0130	Nitab4.5_0001672g0130
														Nitab4.5_0000606g0020	Nitab4.5_0005413g0030	Nitab4.5_0004045g0030	Nitab4.5_0002337g0010	Nitab4.5_0001071g0080	Nitab4.5_0001675g0050
														Nitab4.5_0000610g0020	Nitab4.5_0005441g0020	Nitab4.5_0004055g0010	Nitab4.5_0002345g0080	Nitab4.5_0001079g0100	Nitab4.5_0001688g0070
														Nitab4.5_0000610g0250	Nitab4.5_0005466g0020	Nitab4.5_0004059g0030	Nitab4.5_0002347g0080	Nitab4.5_0001086g0030	Nitab4.5_0001704g0060
														Nitab4.5_0000610g0270	Nitab4.5_0005555g0010	Nitab4.5_0004070g0030	Nitab4.5_0002361g0080	Nitab4.5_0001088g0170	Nitab4.5_0001707g0050
														Nitab4.5_0000610g0280	Nitab4.5_0005577g0010	Nitab4.5_0004083g0020	Nitab4.5_0002361g0110	Nitab4.5_0001091g0090	Nitab4.5_0001707g0120
														Nitab4.5_0000610g0290	Nitab4.5_0005579g0030	Nitab4.5_0004103g0050	Nitab4.5_0002367g0040	Nitab4.5_0001092g0010	Nitab4.5_0001709g0030
														Nitab4.5_0000612g0130	Nitab4.5_0005583g0030	Nitab4.5_0004106g0010	Nitab4.5_0002368g0020	Nitab4.5_0001092g0030	Nitab4.5_0001711g0040
														Nitab4.5_0000613g0190	Nitab4.5_0005583g0040	Nitab4.5_0004123g0020	Nitab4.5_0002377g0030	Nitab4.5_0001094g0130	Nitab4.5_0001727g0170
														Nitab4.5_0000614g0090	Nitab4.5_0005626g0030	Nitab4.5_0004156g0010	Nitab4.5_0002378g0020	Nitab4.5_0001096g0020	Nitab4.5_0001730g0110
														Nitab4.5_0000614g0100	Nitab4.5_0005673g0010	Nitab4.5_0004194g0100	Nitab4.5_0002379g0010	Nitab4.5_0001096g0050	Nitab4.5_0001739g0070
														Nitab4.5_0000618g0070	Nitab4.5_0005710g0020	Nitab4.5_0004198g0010	Nitab4.5_0002382g0030	Nitab4.5_0001097g0100	Nitab4.5_0001744g0070
														Nitab4.5_0000619g0010	Nitab4.5_0005726g0010	Nitab4.5_0004208g0010	Nitab4.5_0002401g0010	Nitab4.5_0001099g0050	Nitab4.5_0001747g0070
														Nitab4.5_0000620g0070	Nitab4.5_0005744g0010	Nitab4.5_0004236g0010	Nitab4.5_0002402g0010	Nitab4.5_0001106g0010	Nitab4.5_0001748g0040
														Nitab4.5_0000620g0210	Nitab4.5_0005805g0060	Nitab4.5_0004304g0040	Nitab4.5_0002405g0050	Nitab4.5_0001109g0060	Nitab4.5_0001751g0070
														Nitab4.5_0000620g0230	Nitab4.5_0005814g0010	Nitab4.5_0004330g0020	Nitab4.5_0002429g0080	Nitab4.5_0001110g0140	Nitab4.5_0001764g0070
														Nitab4.5_0000625g0100	Nitab4.5_0005820g0040	Nitab4.5_0004348g0050	Nitab4.5_0002446g0090	Nitab4.5_0001119g0040	Nitab4.5_0001789g0020
														Nitab4.5_0000628g0070	Nitab4.5_0005885g0010	Nitab4.5_0004355g0050	Nitab4.5_0002458g0090	Nitab4.5_0001128g0030	Nitab4.5_0001791g0030
														Nitab4.5_0000628g0110	Nitab4.5_0005908g0080	Nitab4.5_0004359g0040	Nitab4.5_0002466g0010	Nitab4.5_0001128g0070	Nitab4.5_0001793g0040
														Nitab4.5_0000633g0030	Nitab4.5_0005923g0010	Nitab4.5_0004361g0030	Nitab4.5_0002467g0060	Nitab4.5_0001128g0080	Nitab4.5_0001800g0020
														Nitab4.5_0000634g0140	Nitab4.5_0005928g0010	Nitab4.5_0004375g0040	Nitab4.5_0002485g0020	Nitab4.5_0001128g0090	Nitab4.5_0001800g0120
														Nitab4.5_0000636g0120	Nitab4.5_0005948g0010	Nitab4.5_0004389g0010	Nitab4.5_0002520g0060	Nitab4.5_0001128g0100	Nitab4.5_0001801g0080
														Nitab4.5_0000637g0030	Nitab4.5_0005954g0010	Nitab4.5_0004402g0040	Nitab4.5_0002522g0040	Nitab4.5_0001129g0060	Nitab4.5_0001803g0050
														Nitab4.5_0000638g0040	Nitab4.5_0005998g0010	Nitab4.5_0004411g0050	Nitab4.5_0002527g0020	Nitab4.5_0001142g0030	Nitab4.5_0001807g0080
														Nitab4.5_0000638g0080	Nitab4.5_0006040g0010	Nitab4.5_0004423g0010	Nitab4.5_0002527g0040	Nitab4.5_0001146g0060	Nitab4.5_0001810g0030
														Nitab4.5_0000640g0170	Nitab4.5_0006073g0030	Nitab4.5_0004428g0020	Nitab4.5_0002541g0050	Nitab4.5_0001146g0080	Nitab4.5_0001816g0120
														Nitab4.5_0000642g0040	Nitab4.5_0006081g0010	Nitab4.5_0004430g0100	Nitab4.5_0002542g0020	Nitab4.5_0001157g0010	Nitab4.5_0001816g0200
														Nitab4.5_0000642g0070	Nitab4.5_0006088g0020	Nitab4.5_0004437g0040	Nitab4.5_0002543g0010	Nitab4.5_0001159g0030	Nitab4.5_0001820g0040
														Nitab4.5_0000642g0160	Nitab4.5_0006096g0020	Nitab4.5_0004441g0010	Nitab4.5_0002546g0050	Nitab4.5_0001164g0090	Nitab4.5_0001821g0060
														Nitab4.5_0000642g0210	Nitab4.5_0006121g0020	Nitab4.5_0004465g0010	Nitab4.5_0002548g0010	Nitab4.5_0001164g0190	Nitab4.5_0001822g0040
														Nitab4.5_0000645g0050	Nitab4.5_0006134g0010	Nitab4.5_0004480g0050	Nitab4.5_0002574g0060	Nitab4.5_0001167g0080	Nitab4.5_0001840g0060
														Nitab4.5_0000646g0070	Nitab4.5_0006174g0010	Nitab4.5_0004516g0020	Nitab4.5_0002577g0070	Nitab4.5_0001171g0090	Nitab4.5_0001864g0090
														Nitab4.5_0000646g0090	Nitab4.5_0006222g0010	Nitab4.5_0004522g0020	Nitab4.5_0002587g0040	Nitab4.5_0001172g0110	Nitab4.5_0001871g0040
														Nitab4.5_0000646g0130	Nitab4.5_0006224g0040	Nitab4.5_0004524g0080	Nitab4.5_0002588g0020	Nitab4.5_0001175g0140	Nitab4.5_0001874g0060
														Nitab4.5_0000647g0040	Nitab4.5_0006232g0010	Nitab4.5_0004528g0020	Nitab4.5_0002589g0060	Nitab4.5_0001176g0090	Nitab4.5_0001883g0020
														Nitab4.5_0000647g0050	Nitab4.5_0006260g0020	Nitab4.5_0004530g0090	Nitab4.5_0002597g0010	Nitab4.5_0001180g0220	Nitab4.5_0001884g0050
														Nitab4.5_0000647g0130	Nitab4.5_0006269g0020	Nitab4.5_0004556g0030	Nitab4.5_0002605g0040	Nitab4.5_0001187g0120	Nitab4.5_0001884g0060
														Nitab4.5_0000647g0140	Nitab4.5_0006294g0070	Nitab4.5_0004564g0010	Nitab4.5_0002623g0010	Nitab4.5_0001190g0050	Nitab4.5_0001885g0050
														Nitab4.5_0000647g0160	Nitab4.5_0006360g0010	Nitab4.5_0004594g0080	Nitab4.5_0002626g0020	Nitab4.5_0001192g0080	Nitab4.5_0001894g0040
														Nitab4.5_0000647g0170	Nitab4.5_0006365g0050	Nitab4.5_0004605g0090	Nitab4.5_0002629g0030	Nitab4.5_0001196g0060	Nitab4.5_0001902g0020
														Nitab4.5_0000649g0090	Nitab4.5_0006391g0020	Nitab4.5_0004644g0070	Nitab4.5_0002646g0010	Nitab4.5_0001202g0030	Nitab4.5_0001913g0090
														Nitab4.5_0000649g0170	Nitab4.5_0006429g0060	Nitab4.5_0004645g0010	Nitab4.5_0002654g0150	Nitab4.5_0001208g0090	Nitab4.5_0001922g0090
														Nitab4.5_0000649g0230	Nitab4.5_0006437g0020	Nitab4.5_0004645g0020	Nitab4.5_0002671g0090	Nitab4.5_0001211g0280	Nitab4.5_0001925g0250
														Nitab4.5_0000649g0250	Nitab4.5_0006483g0010	Nitab4.5_0004682g0020	Nitab4.5_0002671g0110	Nitab4.5_0001212g0030	Nitab4.5_0001925g0260
														Nitab4.5_0000650g0160	Nitab4.5_0006507g0060	Nitab4.5_0004709g0010	Nitab4.5_0002673g0040	Nitab4.5_0001215g0120	Nitab4.5_0001928g0020
														Nitab4.5_0000651g0010	Nitab4.5_0006508g0040	Nitab4.5_0004716g0020	Nitab4.5_0002673g0050	Nitab4.5_0001215g0240	Nitab4.5_0001931g0140
														Nitab4.5_0000651g0020	Nitab4.5_0006537g0020	Nitab4.5_0004721g0020	Nitab4.5_0002682g0060	Nitab4.5_0001225g0060	Nitab4.5_0001933g0010
														Nitab4.5_0000651g0040	Nitab4.5_0006558g0010	Nitab4.5_0004728g0030	Nitab4.5_0002687g0010	Nitab4.5_0001229g0040	Nitab4.5_0001933g0090
														Nitab4.5_0000651g0050	Nitab4.5_0006561g0040	Nitab4.5_0004730g0030	Nitab4.5_0002700g0030	Nitab4.5_0001234g0010	Nitab4.5_0001952g0060
														Nitab4.5_0000651g0290	Nitab4.5_0006561g0060	Nitab4.5_0004738g0080	Nitab4.5_0002700g0120	Nitab4.5_0001239g0120	Nitab4.5_0001953g0130
														Nitab4.5_0000652g0050	Nitab4.5_0006568g0010	Nitab4.5_0004739g0010	Nitab4.5_0002700g0150	Nitab4.5_0001252g0020	Nitab4.5_0001955g0110
														Nitab4.5_0000652g0090	Nitab4.5_0006628g0020	Nitab4.5_0004744g0010	Nitab4.5_0002733g0050	Nitab4.5_0001252g0080	Nitab4.5_0001957g0020
														Nitab4.5_0000652g0210	Nitab4.5_0006650g0010	Nitab4.5_0004772g0020	Nitab4.5_0002739g0170	Nitab4.5_0001265g0120	Nitab4.5_0001965g0010
														Nitab4.5_0000661g0070	Nitab4.5_0006656g0060	Nitab4.5_0004802g0010	Nitab4.5_0002740g0110	Nitab4.5_0001266g0040	Nitab4.5_0001982g0010
														Nitab4.5_0000662g0120	Nitab4.5_0006658g0010	Nitab4.5_0004807g0040	Nitab4.5_0002755g0080	Nitab4.5_0001268g0020	Nitab4.5_0001993g0060
														Nitab4.5_0000664g0010	Nitab4.5_0006691g0030	Nitab4.5_0004821g0040	Nitab4.5_0002762g0010	Nitab4.5_0001270g0120	Nitab4.5_0001996g0080
														Nitab4.5_0000664g0060	Nitab4.5_0006701g0020	Nitab4.5_0004836g0010	Nitab4.5_0002771g0030	Nitab4.5_0001277g0070	Nitab4.5_0002015g0020
														Nitab4.5_0000667g0190	Nitab4.5_0006706g0020	Nitab4.5_0004889g0010	Nitab4.5_0002771g0040	Nitab4.5_0001284g0090	Nitab4.5_0002019g0040
														Nitab4.5_0000668g0080	Nitab4.5_0006718g0030	Nitab4.5_0004920g0030	Nitab4.5_0002780g0140	Nitab4.5_0001284g0110	Nitab4.5_0002020g0050
														Nitab4.5_0000668g0090	Nitab4.5_0006787g0010	Nitab4.5_0004928g0040	Nitab4.5_0002783g0040	Nitab4.5_0001288g0190	Nitab4.5_0002036g0020
														Nitab4.5_0000669g0080	Nitab4.5_0006801g0010	Nitab4.5_0004937g0060	Nitab4.5_0002785g0010	Nitab4.5_0001291g0080	Nitab4.5_0002039g0060
														Nitab4.5_0000669g0110	Nitab4.5_0006802g0020	Nitab4.5_0004969g0050	Nitab4.5_0002786g0110	Nitab4.5_0001292g0050	Nitab4.5_0002050g0020
														Nitab4.5_0000670g0050	Nitab4.5_0006822g0040	Nitab4.5_0004989g0030	Nitab4.5_0002791g0060	Nitab4.5_0001296g0030	Nitab4.5_0002055g0150
														Nitab4.5_0000671g0050	Nitab4.5_0006833g0020	Nitab4.5_0004990g0010	Nitab4.5_0002794g0010	Nitab4.5_0001297g0050	Nitab4.5_0002064g0040
														Nitab4.5_0000672g0080	Nitab4.5_0006850g0020	Nitab4.5_0005133g0020	Nitab4.5_0002796g0040	Nitab4.5_0001304g0030	Nitab4.5_0002076g0130
														Nitab4.5_0000673g0150	Nitab4.5_0006880g0040	Nitab4.5_0005149g0010	Nitab4.5_0002815g0080	Nitab4.5_0001306g0040	Nitab4.5_0002093g0020
														Nitab4.5_0000678g0050	Nitab4.5_0006888g0010	Nitab4.5_0005164g0030	Nitab4.5_0002823g0010	Nitab4.5_0001315g0320	Nitab4.5_0002102g0060
														Nitab4.5_0000679g0080	Nitab4.5_0006889g0010	Nitab4.5_0005167g0100	Nitab4.5_0002838g0050	Nitab4.5_0001317g0050	Nitab4.5_0002107g0060
														Nitab4.5_0000680g0010	Nitab4.5_0006933g0030	Nitab4.5_0005193g0020	Nitab4.5_0002839g0010	Nitab4.5_0001318g0050	Nitab4.5_0002113g0180
														Nitab4.5_0000680g0050	Nitab4.5_0006988g0020	Nitab4.5_0005195g0040	Nitab4.5_0002840g0060	Nitab4.5_0001320g0150	Nitab4.5_0002116g0050
														Nitab4.5_0000680g0130	Nitab4.5_0007024g0030	Nitab4.5_0005227g0010	Nitab4.5_0002854g0070	Nitab4.5_0001323g0050	Nitab4.5_0002137g0140
														Nitab4.5_0000682g0040	Nitab4.5_0007034g0020	Nitab4.5_0005282g0010	Nitab4.5_0002860g0010	Nitab4.5_0001326g0010	Nitab4.5_0002156g0050
														Nitab4.5_0000682g0050	Nitab4.5_0007063g0070	Nitab4.5_0005286g0100	Nitab4.5_0002890g0040	Nitab4.5_0001326g0130	Nitab4.5_0002158g0080
														Nitab4.5_0000686g0120	Nitab4.5_0007068g0040	Nitab4.5_0005320g0010	Nitab4.5_0002904g0100	Nitab4.5_0001331g0030	Nitab4.5_0002158g0140
														Nitab4.5_0000687g0110	Nitab4.5_0007074g0020	Nitab4.5_0005335g0020	Nitab4.5_0002906g0080	Nitab4.5_0001356g0110	Nitab4.5_0002162g0200
														Nitab4.5_0000688g0170	Nitab4.5_0007088g0020	Nitab4.5_0005382g0020	Nitab4.5_0002914g0140	Nitab4.5_0001364g0010	Nitab4.5_0002177g0170
														Nitab4.5_0000696g0060	Nitab4.5_0007140g0010	Nitab4.5_0005392g0070	Nitab4.5_0002920g0050	Nitab4.5_0001367g0030	Nitab4.5_0002182g0090
														Nitab4.5_0000698g0020	Nitab4.5_0007142g0040	Nitab4.5_0005409g0020	Nitab4.5_0002926g0010	Nitab4.5_0001367g0070	Nitab4.5_0002186g0060
														Nitab4.5_0000705g0070	Nitab4.5_0007166g0040	Nitab4.5_0005414g0030	Nitab4.5_0002926g0030	Nitab4.5_0001368g0010	Nitab4.5_0002196g0070
														Nitab4.5_0000705g0120	Nitab4.5_0007254g0040	Nitab4.5_0005428g0060	Nitab4.5_0002929g0010	Nitab4.5_0001372g0020	Nitab4.5_0002200g0010
														Nitab4.5_0000710g0010	Nitab4.5_0007257g0030	Nitab4.5_0005441g0020	Nitab4.5_0002946g0030	Nitab4.5_0001372g0080	Nitab4.5_0002201g0040
														Nitab4.5_0000712g0270	Nitab4.5_0007261g0080	Nitab4.5_0005459g0010	Nitab4.5_0002946g0040	Nitab4.5_0001381g0190	Nitab4.5_0002207g0040
														Nitab4.5_0000712g0280	Nitab4.5_0007360g0020	Nitab4.5_0005538g0020	Nitab4.5_0002978g0030	Nitab4.5_0001386g0020	Nitab4.5_0002209g0150
														Nitab4.5_0000713g0070	Nitab4.5_0007402g0050	Nitab4.5_0005558g0040	Nitab4.5_0002989g0010	Nitab4.5_0001392g0070	Nitab4.5_0002214g0060
														Nitab4.5_0000714g0020	Nitab4.5_0007466g0010	Nitab4.5_0005579g0030	Nitab4.5_0003032g0010	Nitab4.5_0001393g0020	Nitab4.5_0002227g0070
														Nitab4.5_0000714g0050	Nitab4.5_0007475g0010	Nitab4.5_0005582g0030	Nitab4.5_0003035g0030	Nitab4.5_0001393g0130	Nitab4.5_0002245g0100
														Nitab4.5_0000714g0140	Nitab4.5_0007512g0030	Nitab4.5_0005583g0030	Nitab4.5_0003042g0010	Nitab4.5_0001397g0020	Nitab4.5_0002259g0060
														Nitab4.5_0000715g0170	Nitab4.5_0007540g0020	Nitab4.5_0005597g0020	Nitab4.5_0003058g0020	Nitab4.5_0001401g0050	Nitab4.5_0002263g0060
														Nitab4.5_0000716g0020	Nitab4.5_0007549g0010	Nitab4.5_0005605g0020	Nitab4.5_0003058g0030	Nitab4.5_0001404g0050	Nitab4.5_0002273g0010
														Nitab4.5_0000718g0320	Nitab4.5_0007611g0010	Nitab4.5_0005646g0010	Nitab4.5_0003069g0090	Nitab4.5_0001413g0040	Nitab4.5_0002279g0070
														Nitab4.5_0000720g0070	Nitab4.5_0007611g0030	Nitab4.5_0005648g0030	Nitab4.5_0003076g0080	Nitab4.5_0001417g0050	Nitab4.5_0002280g0060
														Nitab4.5_0000722g0020	Nitab4.5_0007624g0050	Nitab4.5_0005664g0030	Nitab4.5_0003080g0080	Nitab4.5_0001422g0010	Nitab4.5_0002282g0090
														Nitab4.5_0000723g0060	Nitab4.5_0007710g0010	Nitab4.5_0005716g0030	Nitab4.5_0003088g0020	Nitab4.5_0001423g0030	Nitab4.5_0002283g0030
														Nitab4.5_0000723g0150	Nitab4.5_0007722g0040	Nitab4.5_0005726g0010	Nitab4.5_0003098g0040	Nitab4.5_0001427g0090	Nitab4.5_0002286g0090
														Nitab4.5_0000723g0160	Nitab4.5_0007727g0010	Nitab4.5_0005728g0020	Nitab4.5_0003109g0010	Nitab4.5_0001429g0020	Nitab4.5_0002292g0010
														Nitab4.5_0000723g0230	Nitab4.5_0007740g0010	Nitab4.5_0005729g0030	Nitab4.5_0003167g0010	Nitab4.5_0001432g0130	Nitab4.5_0002304g0070
														Nitab4.5_0000728g0140	Nitab4.5_0007792g0010	Nitab4.5_0005733g0040	Nitab4.5_0003179g0030	Nitab4.5_0001437g0100	Nitab4.5_0002308g0030
														Nitab4.5_0000729g0130	Nitab4.5_0007815g0080	Nitab4.5_0005760g0020	Nitab4.5_0003207g0080	Nitab4.5_0001453g0100	Nitab4.5_0002309g0040
														Nitab4.5_0000732g0120	Nitab4.5_0007835g0010	Nitab4.5_0005769g0040	Nitab4.5_0003244g0020	Nitab4.5_0001464g0010	Nitab4.5_0002309g0080
														Nitab4.5_0000732g0130	Nitab4.5_0007882g0010	Nitab4.5_0005776g0030	Nitab4.5_0003247g0010	Nitab4.5_0001468g0070	Nitab4.5_0002322g0170
														Nitab4.5_0000733g0190	Nitab4.5_0007963g0040	Nitab4.5_0005800g0010	Nitab4.5_0003250g0020	Nitab4.5_0001473g0020	Nitab4.5_0002338g0020
														Nitab4.5_0000734g0070	Nitab4.5_0007970g0020	Nitab4.5_0005805g0060	Nitab4.5_0003251g0040	Nitab4.5_0001474g0050	Nitab4.5_0002343g0020
														Nitab4.5_0000737g0060	Nitab4.5_0007992g0040	Nitab4.5_0005814g0010	Nitab4.5_0003259g0090	Nitab4.5_0001477g0200	Nitab4.5_0002345g0080
														Nitab4.5_0000738g0040	Nitab4.5_0008015g0010	Nitab4.5_0005816g0010	Nitab4.5_0003275g0020	Nitab4.5_0001480g0120	Nitab4.5_0002347g0080
														Nitab4.5_0000738g0080	Nitab4.5_0008054g0020	Nitab4.5_0005838g0020	Nitab4.5_0003281g0090	Nitab4.5_0001485g0200	Nitab4.5_0002350g0050
														Nitab4.5_0000742g0100	Nitab4.5_0008072g0010	Nitab4.5_0005885g0010	Nitab4.5_0003299g0010	Nitab4.5_0001485g0210	Nitab4.5_0002352g0120
														Nitab4.5_0000742g0110	Nitab4.5_0008080g0010	Nitab4.5_0005908g0080	Nitab4.5_0003324g0100	Nitab4.5_0001489g0010	Nitab4.5_0002357g0010
														Nitab4.5_0000744g0050	Nitab4.5_0008107g0010	Nitab4.5_0005910g0010	Nitab4.5_0003328g0120	Nitab4.5_0001492g0060	Nitab4.5_0002377g0030
														Nitab4.5_0000744g0140	Nitab4.5_0008115g0010	Nitab4.5_0005958g0020	Nitab4.5_0003335g0080	Nitab4.5_0001495g0130	Nitab4.5_0002398g0020
														Nitab4.5_0000745g0040	Nitab4.5_0008136g0010	Nitab4.5_0005968g0030	Nitab4.5_0003347g0030	Nitab4.5_0001503g0100	Nitab4.5_0002400g0040
														Nitab4.5_0000745g0050	Nitab4.5_0008141g0030	Nitab4.5_0005980g0020	Nitab4.5_0003376g0080	Nitab4.5_0001509g0030	Nitab4.5_0002401g0010
														Nitab4.5_0000745g0090	Nitab4.5_0008142g0020	Nitab4.5_0006014g0010	Nitab4.5_0003394g0020	Nitab4.5_0001530g0020	Nitab4.5_0002406g0040
														Nitab4.5_0000745g0130	Nitab4.5_0008156g0030	Nitab4.5_0006022g0010	Nitab4.5_0003417g0010	Nitab4.5_0001541g0050	Nitab4.5_0002415g0060
														Nitab4.5_0000745g0170	Nitab4.5_0008185g0020	Nitab4.5_0006031g0080	Nitab4.5_0003419g0060	Nitab4.5_0001542g0020	Nitab4.5_0002438g0030
														Nitab4.5_0000745g0220	Nitab4.5_0008197g0030	Nitab4.5_0006040g0010	Nitab4.5_0003436g0010	Nitab4.5_0001565g0040	Nitab4.5_0002438g0100
														Nitab4.5_0000747g0030	Nitab4.5_0008213g0050	Nitab4.5_0006051g0010	Nitab4.5_0003437g0010	Nitab4.5_0001569g0140	Nitab4.5_0002441g0010
														Nitab4.5_0000747g0050	Nitab4.5_0008312g0060	Nitab4.5_0006069g0030	Nitab4.5_0003449g0080	Nitab4.5_0001569g0160	Nitab4.5_0002443g0040
														Nitab4.5_0000748g0100	Nitab4.5_0008336g0010	Nitab4.5_0006071g0090	Nitab4.5_0003452g0010	Nitab4.5_0001572g0030	Nitab4.5_0002456g0070
														Nitab4.5_0000752g0030	Nitab4.5_0008523g0030	Nitab4.5_0006073g0030	Nitab4.5_0003464g0030	Nitab4.5_0001579g0060	Nitab4.5_0002456g0090
														Nitab4.5_0000753g0020	Nitab4.5_0008525g0020	Nitab4.5_0006086g0040	Nitab4.5_0003488g0060	Nitab4.5_0001580g0060	Nitab4.5_0002456g0130
														Nitab4.5_0000755g0140	Nitab4.5_0008568g0030	Nitab4.5_0006090g0010	Nitab4.5_0003496g0010	Nitab4.5_0001583g0210	Nitab4.5_0002458g0030
														Nitab4.5_0000756g0030	Nitab4.5_0008580g0020	Nitab4.5_0006120g0060	Nitab4.5_0003573g0020	Nitab4.5_0001585g0070	Nitab4.5_0002462g0090
														Nitab4.5_0000758g0060	Nitab4.5_0008731g0010	Nitab4.5_0006133g0030	Nitab4.5_0003580g0050	Nitab4.5_0001599g0220	Nitab4.5_0002465g0050
														Nitab4.5_0000759g0270	Nitab4.5_0008908g0010	Nitab4.5_0006134g0010	Nitab4.5_0003588g0050	Nitab4.5_0001601g0080	Nitab4.5_0002466g0010
														Nitab4.5_0000762g0010	Nitab4.5_0008957g0050	Nitab4.5_0006137g0040	Nitab4.5_0003619g0020	Nitab4.5_0001604g0120	Nitab4.5_0002470g0070
														Nitab4.5_0000764g0010	Nitab4.5_0009025g0030	Nitab4.5_0006148g0040	Nitab4.5_0003652g0010	Nitab4.5_0001606g0070	Nitab4.5_0002498g0030
														Nitab4.5_0000766g0050	Nitab4.5_0009059g0010	Nitab4.5_0006152g0030	Nitab4.5_0003654g0010	Nitab4.5_0001607g0020	Nitab4.5_0002500g0070
														Nitab4.5_0000766g0070	Nitab4.5_0009131g0030	Nitab4.5_0006156g0030	Nitab4.5_0003722g0030	Nitab4.5_0001607g0030	Nitab4.5_0002520g0080
														Nitab4.5_0000769g0010	Nitab4.5_0009151g0020	Nitab4.5_0006168g0010	Nitab4.5_0003734g0040	Nitab4.5_0001614g0030	Nitab4.5_0002525g0020
														Nitab4.5_0000769g0020	Nitab4.5_0009182g0010	Nitab4.5_0006203g0020	Nitab4.5_0003765g0030	Nitab4.5_0001615g0210	Nitab4.5_0002530g0010
														Nitab4.5_0000769g0050	Nitab4.5_0009190g0010	Nitab4.5_0006269g0020	Nitab4.5_0003771g0010	Nitab4.5_0001617g0060	Nitab4.5_0002532g0030
														Nitab4.5_0000769g0190	Nitab4.5_0009224g0010	Nitab4.5_0006269g0030	Nitab4.5_0003779g0100	Nitab4.5_0001619g0110	Nitab4.5_0002543g0020
														Nitab4.5_0000771g0070	Nitab4.5_0009234g0010	Nitab4.5_0006312g0020	Nitab4.5_0003794g0080	Nitab4.5_0001622g0050	Nitab4.5_0002546g0050
														Nitab4.5_0000775g0030	Nitab4.5_0009276g0030	Nitab4.5_0006314g0030	Nitab4.5_0003811g0100	Nitab4.5_0001642g0050	Nitab4.5_0002547g0010
														Nitab4.5_0000775g0040	Nitab4.5_0009399g0020	Nitab4.5_0006317g0040	Nitab4.5_0003818g0040	Nitab4.5_0001645g0050	Nitab4.5_0002548g0010
														Nitab4.5_0000775g0090	Nitab4.5_0009436g0030	Nitab4.5_0006367g0020	Nitab4.5_0003828g0030	Nitab4.5_0001647g0120	Nitab4.5_0002567g0050
														Nitab4.5_0000776g0030	Nitab4.5_0009497g0010	Nitab4.5_0006392g0050	Nitab4.5_0003837g0020	Nitab4.5_0001650g0160	Nitab4.5_0002567g0090
														Nitab4.5_0000777g0020	Nitab4.5_0009510g0020	Nitab4.5_0006429g0030	Nitab4.5_0003848g0020	Nitab4.5_0001654g0010	Nitab4.5_0002574g0060
														Nitab4.5_0000777g0080	Nitab4.5_0009512g0040	Nitab4.5_0006429g0060	Nitab4.5_0003875g0010	Nitab4.5_0001658g0020	Nitab4.5_0002576g0030
														Nitab4.5_0000777g0090	Nitab4.5_0009577g0040	Nitab4.5_0006443g0010	Nitab4.5_0003885g0020	Nitab4.5_0001659g0030	Nitab4.5_0002586g0040
														Nitab4.5_0000777g0130	Nitab4.5_0009622g0010	Nitab4.5_0006475g0040	Nitab4.5_0003906g0010	Nitab4.5_0001663g0140	Nitab4.5_0002590g0030
														Nitab4.5_0000777g0140	Nitab4.5_0009648g0020	Nitab4.5_0006489g0040	Nitab4.5_0003913g0040	Nitab4.5_0001664g0080	Nitab4.5_0002623g0010
														Nitab4.5_0000781g0040	Nitab4.5_0009785g0060	Nitab4.5_0006586g0040	Nitab4.5_0003926g0020	Nitab4.5_0001668g0090	Nitab4.5_0002626g0020
														Nitab4.5_0000782g0170	Nitab4.5_0009827g0030	Nitab4.5_0006672g0010	Nitab4.5_0003934g0060	Nitab4.5_0001669g0030	Nitab4.5_0002629g0090
														Nitab4.5_0000783g0180	Nitab4.5_0009835g0020	Nitab4.5_0006691g0030	Nitab4.5_0003953g0010	Nitab4.5_0001674g0010	Nitab4.5_0002645g0030
														Nitab4.5_0000784g0030	Nitab4.5_0009873g0010	Nitab4.5_0006706g0030	Nitab4.5_0003967g0020	Nitab4.5_0001675g0130	Nitab4.5_0002649g0010
														Nitab4.5_0000784g0060	Nitab4.5_0009895g0020	Nitab4.5_0006795g0020	Nitab4.5_0003981g0080	Nitab4.5_0001683g0050	Nitab4.5_0002661g0130
														Nitab4.5_0000785g0080	Nitab4.5_0009946g0020	Nitab4.5_0006802g0020	Nitab4.5_0003991g0020	Nitab4.5_0001688g0070	Nitab4.5_0002671g0110
														Nitab4.5_0000787g0100	Nitab4.5_0009955g0010	Nitab4.5_0006812g0010	Nitab4.5_0003995g0030	Nitab4.5_0001691g0040	Nitab4.5_0002673g0040
														Nitab4.5_0000787g0160	Nitab4.5_0009967g0020	Nitab4.5_0006823g0010	Nitab4.5_0004013g0020	Nitab4.5_0001696g0070	Nitab4.5_0002673g0050
														Nitab4.5_0000791g0090	Nitab4.5_0009972g0030	Nitab4.5_0006833g0020	Nitab4.5_0004027g0010	Nitab4.5_0001700g0060	Nitab4.5_0002675g0040
														Nitab4.5_0000791g0130	Nitab4.5_0009973g0020	Nitab4.5_0006852g0070	Nitab4.5_0004059g0030	Nitab4.5_0001701g0210	Nitab4.5_0002679g0020
														Nitab4.5_0000794g0030	Nitab4.5_0010196g0020	Nitab4.5_0006854g0020	Nitab4.5_0004070g0030	Nitab4.5_0001704g0120	Nitab4.5_0002682g0060
														Nitab4.5_0000798g0150	Nitab4.5_0010196g0040	Nitab4.5_0006856g0030	Nitab4.5_0004071g0020	Nitab4.5_0001707g0050	Nitab4.5_0002686g0040
														Nitab4.5_0000799g0010	Nitab4.5_0010236g0020	Nitab4.5_0006882g0050	Nitab4.5_0004095g0050	Nitab4.5_0001707g0120	Nitab4.5_0002700g0030
														Nitab4.5_0000800g0030	Nitab4.5_0010294g0020	Nitab4.5_0006887g0020	Nitab4.5_0004097g0050	Nitab4.5_0001716g0010	Nitab4.5_0002700g0120
														Nitab4.5_0000803g0050	Nitab4.5_0010294g0030	Nitab4.5_0006888g0010	Nitab4.5_0004123g0030	Nitab4.5_0001727g0170	Nitab4.5_0002700g0150
														Nitab4.5_0000807g0110	Nitab4.5_0010294g0050	Nitab4.5_0006947g0010	Nitab4.5_0004156g0010	Nitab4.5_0001736g0020	Nitab4.5_0002701g0020
														Nitab4.5_0000812g0090	Nitab4.5_0010505g0020	Nitab4.5_0006973g0030	Nitab4.5_0004168g0140	Nitab4.5_0001739g0070	Nitab4.5_0002718g0050
														Nitab4.5_0000820g0050	Nitab4.5_0010554g0030	Nitab4.5_0006998g0030	Nitab4.5_0004194g0100	Nitab4.5_0001744g0070	Nitab4.5_0002719g0040
														Nitab4.5_0000824g0010	Nitab4.5_0010558g0040	Nitab4.5_0007021g0010	Nitab4.5_0004208g0010	Nitab4.5_0001748g0050	Nitab4.5_0002720g0030
														Nitab4.5_0000826g0100	Nitab4.5_0010630g0010	Nitab4.5_0007030g0010	Nitab4.5_0004217g0080	Nitab4.5_0001750g0050	Nitab4.5_0002720g0050
														Nitab4.5_0000826g0200	Nitab4.5_0010636g0020	Nitab4.5_0007034g0020	Nitab4.5_0004249g0020	Nitab4.5_0001759g0080	Nitab4.5_0002721g0060
														Nitab4.5_0000828g0010	Nitab4.5_0010693g0010	Nitab4.5_0007056g0010	Nitab4.5_0004251g0090	Nitab4.5_0001769g0100	Nitab4.5_0002723g0010
														Nitab4.5_0000829g0160	Nitab4.5_0010709g0010	Nitab4.5_0007068g0040	Nitab4.5_0004261g0030	Nitab4.5_0001771g0140	Nitab4.5_0002723g0040
														Nitab4.5_0000831g0120	Nitab4.5_0010758g0040	Nitab4.5_0007090g0020	Nitab4.5_0004286g0050	Nitab4.5_0001780g0120	Nitab4.5_0002728g0070
														Nitab4.5_0000833g0060	Nitab4.5_0010781g0010	Nitab4.5_0007174g0020	Nitab4.5_0004294g0030	Nitab4.5_0001789g0030	Nitab4.5_0002740g0110
														Nitab4.5_0000837g0080	Nitab4.5_0010796g0010	Nitab4.5_0007185g0030	Nitab4.5_0004300g0180	Nitab4.5_0001791g0030	Nitab4.5_0002744g0030
														Nitab4.5_0000837g0090	Nitab4.5_0010993g0020	Nitab4.5_0007191g0020	Nitab4.5_0004304g0040	Nitab4.5_0001793g0130	Nitab4.5_0002752g0050
														Nitab4.5_0000838g0040	Nitab4.5_0011001g0030	Nitab4.5_0007207g0020	Nitab4.5_0004320g0030	Nitab4.5_0001794g0130	Nitab4.5_0002755g0080
														Nitab4.5_0000838g0070	Nitab4.5_0011008g0010	Nitab4.5_0007217g0030	Nitab4.5_0004326g0040	Nitab4.5_0001799g0070	Nitab4.5_0002760g0020
														Nitab4.5_0000838g0130	Nitab4.5_0011027g0010	Nitab4.5_0007254g0040	Nitab4.5_0004330g0020	Nitab4.5_0001800g0020	Nitab4.5_0002760g0050
														Nitab4.5_0000844g0010	Nitab4.5_0011123g0010	Nitab4.5_0007254g0050	Nitab4.5_0004334g0060	Nitab4.5_0001800g0120	Nitab4.5_0002764g0060
														Nitab4.5_0000845g0180	Nitab4.5_0011157g0010	Nitab4.5_0007351g0020	Nitab4.5_0004355g0050	Nitab4.5_0001807g0080	Nitab4.5_0002772g0010
														Nitab4.5_0000845g0230	Nitab4.5_0011212g0020	Nitab4.5_0007439g0020	Nitab4.5_0004358g0060	Nitab4.5_0001810g0030	Nitab4.5_0002780g0140
														Nitab4.5_0000850g0110	Nitab4.5_0011368g0030	Nitab4.5_0007466g0010	Nitab4.5_0004359g0040	Nitab4.5_0001812g0080	Nitab4.5_0002783g0040
														Nitab4.5_0000856g0010	Nitab4.5_0011386g0010	Nitab4.5_0007468g0020	Nitab4.5_0004361g0030	Nitab4.5_0001817g0010	Nitab4.5_0002787g0040
														Nitab4.5_0000856g0090	Nitab4.5_0011407g0020	Nitab4.5_0007509g0010	Nitab4.5_0004390g0020	Nitab4.5_0001821g0060	Nitab4.5_0002794g0010
														Nitab4.5_0000856g0210	Nitab4.5_0011414g0010	Nitab4.5_0007575g0010	Nitab4.5_0004411g0050	Nitab4.5_0001831g0080	Nitab4.5_0002796g0040
														Nitab4.5_0000857g0030	Nitab4.5_0011428g0010	Nitab4.5_0007598g0030	Nitab4.5_0004423g0010	Nitab4.5_0001841g0150	Nitab4.5_0002804g0010
														Nitab4.5_0000857g0110	Nitab4.5_0011529g0020	Nitab4.5_0007611g0030	Nitab4.5_0004437g0040	Nitab4.5_0001842g0020	Nitab4.5_0002807g0030
														Nitab4.5_0000859g0200	Nitab4.5_0011544g0010	Nitab4.5_0007628g0040	Nitab4.5_0004441g0010	Nitab4.5_0001849g0020	Nitab4.5_0002815g0160
														Nitab4.5_0000860g0160	Nitab4.5_0011578g0040	Nitab4.5_0007650g0040	Nitab4.5_0004482g0040	Nitab4.5_0001861g0020	Nitab4.5_0002817g0010
														Nitab4.5_0000861g0050	Nitab4.5_0011605g0010	Nitab4.5_0007661g0020	Nitab4.5_0004506g0120	Nitab4.5_0001871g0030	Nitab4.5_0002817g0050
														Nitab4.5_0000863g0210	Nitab4.5_0011630g0010	Nitab4.5_0007689g0060	Nitab4.5_0004516g0020	Nitab4.5_0001871g0040	Nitab4.5_0002823g0010
														Nitab4.5_0000864g0220	Nitab4.5_0011671g0010	Nitab4.5_0007760g0010	Nitab4.5_0004523g0050	Nitab4.5_0001879g0020	Nitab4.5_0002823g0100
														Nitab4.5_0000868g0020	Nitab4.5_0011671g0020	Nitab4.5_0007793g0050	Nitab4.5_0004530g0090	Nitab4.5_0001879g0150	Nitab4.5_0002838g0050
														Nitab4.5_0000870g0060	Nitab4.5_0011716g0020	Nitab4.5_0007832g0030	Nitab4.5_0004554g0010	Nitab4.5_0001884g0050	Nitab4.5_0002839g0010
														Nitab4.5_0000871g0060	Nitab4.5_0011739g0010	Nitab4.5_0007860g0010	Nitab4.5_0004557g0030	Nitab4.5_0001887g0050	Nitab4.5_0002886g0050
														Nitab4.5_0000872g0040	Nitab4.5_0011805g0020	Nitab4.5_0007908g0020	Nitab4.5_0004562g0020	Nitab4.5_0001889g0140	Nitab4.5_0002904g0100
														Nitab4.5_0000874g0040	Nitab4.5_0011813g0010	Nitab4.5_0007944g0040	Nitab4.5_0004566g0010	Nitab4.5_0001892g0050	Nitab4.5_0002906g0080
														Nitab4.5_0000874g0150	Nitab4.5_0011815g0020	Nitab4.5_0007963g0040	Nitab4.5_0004612g0020	Nitab4.5_0001892g0090	Nitab4.5_0002918g0030
														Nitab4.5_0000875g0110	Nitab4.5_0011862g0010	Nitab4.5_0007994g0010	Nitab4.5_0004614g0010	Nitab4.5_0001898g0080	Nitab4.5_0002929g0030
														Nitab4.5_0000876g0130	Nitab4.5_0011932g0010	Nitab4.5_0008054g0020	Nitab4.5_0004625g0010	Nitab4.5_0001901g0030	Nitab4.5_0002932g0010
														Nitab4.5_0000876g0140	Nitab4.5_0012027g0010	Nitab4.5_0008071g0010	Nitab4.5_0004644g0030	Nitab4.5_0001907g0090	Nitab4.5_0002932g0020
														Nitab4.5_0000880g0080	Nitab4.5_0012069g0010	Nitab4.5_0008115g0010	Nitab4.5_0004657g0030	Nitab4.5_0001912g0020	Nitab4.5_0002948g0020
														Nitab4.5_0000881g0110	Nitab4.5_0012094g0010	Nitab4.5_0008136g0010	Nitab4.5_0004694g0040	Nitab4.5_0001916g0070	Nitab4.5_0002956g0080
														Nitab4.5_0000883g0010	Nitab4.5_0012096g0010	Nitab4.5_0008156g0030	Nitab4.5_0004701g0070	Nitab4.5_0001921g0030	Nitab4.5_0002971g0010
														Nitab4.5_0000883g0020	Nitab4.5_0012102g0010	Nitab4.5_0008189g0010	Nitab4.5_0004709g0010	Nitab4.5_0001922g0090	Nitab4.5_0002980g0050
														Nitab4.5_0000883g0140	Nitab4.5_0012102g0020	Nitab4.5_0008210g0050	Nitab4.5_0004710g0010	Nitab4.5_0001926g0060	Nitab4.5_0003011g0040
														Nitab4.5_0000886g0020	Nitab4.5_0012115g0010	Nitab4.5_0008213g0070	Nitab4.5_0004711g0030	Nitab4.5_0001948g0060	Nitab4.5_0003022g0060
														Nitab4.5_0000886g0120	Nitab4.5_0012161g0030	Nitab4.5_0008233g0030	Nitab4.5_0004730g0030	Nitab4.5_0001952g0250	Nitab4.5_0003032g0010
														Nitab4.5_0000888g0140	Nitab4.5_0012312g0010	Nitab4.5_0008240g0010	Nitab4.5_0004730g0040	Nitab4.5_0001955g0030	Nitab4.5_0003035g0030
														Nitab4.5_0000895g0070	Nitab4.5_0012351g0020	Nitab4.5_0008255g0010	Nitab4.5_0004738g0080	Nitab4.5_0001957g0020	Nitab4.5_0003035g0040
														Nitab4.5_0000898g0120	Nitab4.5_0012660g0020	Nitab4.5_0008316g0020	Nitab4.5_0004756g0030	Nitab4.5_0001970g0020	Nitab4.5_0003067g0030
														Nitab4.5_0000900g0040	Nitab4.5_0012714g0010	Nitab4.5_0008372g0010	Nitab4.5_0004756g0060	Nitab4.5_0001970g0070	Nitab4.5_0003074g0070
														Nitab4.5_0000900g0050	Nitab4.5_0012752g0010	Nitab4.5_0008490g0020	Nitab4.5_0004775g0010	Nitab4.5_0001982g0120	Nitab4.5_0003076g0080
														Nitab4.5_0000900g0090	Nitab4.5_0012800g0010	Nitab4.5_0008522g0060	Nitab4.5_0004802g0010	Nitab4.5_0001991g0040	Nitab4.5_0003090g0030
														Nitab4.5_0000900g0150	Nitab4.5_0012894g0010	Nitab4.5_0008525g0010	Nitab4.5_0004814g0010	Nitab4.5_0001996g0010	Nitab4.5_0003094g0030
														Nitab4.5_0000902g0090	Nitab4.5_0012898g0020	Nitab4.5_0008525g0020	Nitab4.5_0004836g0030	Nitab4.5_0001999g0030	Nitab4.5_0003100g0030
														Nitab4.5_0000902g0140	Nitab4.5_0012899g0010	Nitab4.5_0008533g0020	Nitab4.5_0004854g0010	Nitab4.5_0002002g0110	Nitab4.5_0003100g0070
														Nitab4.5_0000902g0150	Nitab4.5_0012929g0010	Nitab4.5_0008543g0010	Nitab4.5_0004859g0050	Nitab4.5_0002008g0050	Nitab4.5_0003136g0040
														Nitab4.5_0000902g0170	Nitab4.5_0013033g0010	Nitab4.5_0008552g0030	Nitab4.5_0004860g0010	Nitab4.5_0002016g0120	Nitab4.5_0003151g0060
														Nitab4.5_0000902g0190	Nitab4.5_0013087g0020	Nitab4.5_0008572g0010	Nitab4.5_0004861g0040	Nitab4.5_0002018g0080	Nitab4.5_0003160g0020
														Nitab4.5_0000902g0260	Nitab4.5_0013109g0010	Nitab4.5_0008580g0020	Nitab4.5_0004862g0070	Nitab4.5_0002029g0040	Nitab4.5_0003180g0060
														Nitab4.5_0000902g0350	Nitab4.5_0013195g0010	Nitab4.5_0008604g0010	Nitab4.5_0004869g0030	Nitab4.5_0002040g0080	Nitab4.5_0003185g0090
														Nitab4.5_0000903g0020	Nitab4.5_0013322g0010	Nitab4.5_0008756g0030	Nitab4.5_0004874g0010	Nitab4.5_0002050g0020	Nitab4.5_0003188g0010
														Nitab4.5_0000905g0130	Nitab4.5_0013455g0010	Nitab4.5_0008816g0020	Nitab4.5_0004889g0010	Nitab4.5_0002053g0030	Nitab4.5_0003205g0040
														Nitab4.5_0000906g0010	Nitab4.5_0013455g0030	Nitab4.5_0008928g0010	Nitab4.5_0004905g0020	Nitab4.5_0002053g0060	Nitab4.5_0003209g0030
														Nitab4.5_0000907g0080	Nitab4.5_0013596g0010	Nitab4.5_0008962g0050	Nitab4.5_0004920g0030	Nitab4.5_0002053g0110	Nitab4.5_0003213g0030
														Nitab4.5_0000912g0050	Nitab4.5_0013627g0020	Nitab4.5_0009059g0010	Nitab4.5_0004937g0030	Nitab4.5_0002064g0040	Nitab4.5_0003234g0040
														Nitab4.5_0000914g0110	Nitab4.5_0013628g0010	Nitab4.5_0009125g0020	Nitab4.5_0004937g0060	Nitab4.5_0002081g0010	Nitab4.5_0003241g0030
														Nitab4.5_0000914g0120	Nitab4.5_0013991g0010	Nitab4.5_0009147g0010	Nitab4.5_0004969g0100	Nitab4.5_0002093g0020	Nitab4.5_0003244g0020
														Nitab4.5_0000914g0270	Nitab4.5_0014188g0010	Nitab4.5_0009181g0010	Nitab4.5_0004983g0040	Nitab4.5_0002093g0170	Nitab4.5_0003246g0030
														Nitab4.5_0000915g0220	Nitab4.5_0014344g0010	Nitab4.5_0009232g0030	Nitab4.5_0004989g0030	Nitab4.5_0002093g0240	Nitab4.5_0003249g0020
														Nitab4.5_0000916g0110	Nitab4.5_0015544g0010	Nitab4.5_0009267g0020	Nitab4.5_0004994g0050	Nitab4.5_0002097g0110	Nitab4.5_0003251g0040
														Nitab4.5_0000917g0030	Nitab4.5_0016704g0010	Nitab4.5_0009267g0030	Nitab4.5_0005006g0010	Nitab4.5_0002098g0010	Nitab4.5_0003259g0090
														Nitab4.5_0000923g0050	Nitab4.5_0017306g0010	Nitab4.5_0009284g0020	Nitab4.5_0005015g0020	Nitab4.5_0002102g0030	Nitab4.5_0003261g0010
														Nitab4.5_0000926g0140	Nitab4.5_0017907g0010	Nitab4.5_0009392g0010	Nitab4.5_0005030g0010	Nitab4.5_0002103g0110	Nitab4.5_0003284g0010
														Nitab4.5_0000927g0060	Nitab4.5_0018301g0010	Nitab4.5_0009399g0020	Nitab4.5_0005042g0010	Nitab4.5_0002112g0110	Nitab4.5_0003284g0040
														Nitab4.5_0000928g0090	Nitab4.5_0018794g0010	Nitab4.5_0009438g0020	Nitab4.5_0005046g0010	Nitab4.5_0002113g0180	Nitab4.5_0003289g0010
														Nitab4.5_0000933g0020	Nitab4.5_0018960g0010	Nitab4.5_0009443g0010	Nitab4.5_0005077g0030	Nitab4.5_0002114g0130	Nitab4.5_0003290g0010
														Nitab4.5_0000933g0030	Nitab4.5_0019856g0010	Nitab4.5_0009454g0010	Nitab4.5_0005096g0010	Nitab4.5_0002116g0050	Nitab4.5_0003292g0030
														Nitab4.5_0000934g0040	Nitab4.5_0020608g0010	Nitab4.5_0009461g0010	Nitab4.5_0005101g0010	Nitab4.5_0002137g0080	Nitab4.5_0003295g0180
														Nitab4.5_0000934g0150	Nitab4.5_0021096g0010	Nitab4.5_0009493g0010	Nitab4.5_0005114g0020	Nitab4.5_0002137g0130	Nitab4.5_0003298g0060
														Nitab4.5_0000939g0020	Nitab4.5_0022042g0010	Nitab4.5_0009648g0020	Nitab4.5_0005133g0020	Nitab4.5_0002137g0140	Nitab4.5_0003299g0010
														Nitab4.5_0000939g0030	Nitab4.5_0022765g0010	Nitab4.5_0009672g0010	Nitab4.5_0005157g0010	Nitab4.5_0002145g0010	Nitab4.5_0003307g0010
														Nitab4.5_0000943g0050	Nitab4.5_0026398g0010	Nitab4.5_0009705g0010	Nitab4.5_0005164g0030	Nitab4.5_0002154g0010	Nitab4.5_0003309g0070
														Nitab4.5_0000956g0090	Nitab4.5_0026421g0010	Nitab4.5_0009737g0010	Nitab4.5_0005191g0060	Nitab4.5_0002156g0050	Nitab4.5_0003310g0010
														Nitab4.5_0000957g0170	Nitab4.5_0029367g0020	Nitab4.5_0009751g0020	Nitab4.5_0005206g0010	Nitab4.5_0002157g0130	Nitab4.5_0003314g0090
														Nitab4.5_0000957g0180	Nitab4.5_0029531g0010	Nitab4.5_0009762g0040	Nitab4.5_0005219g0060	Nitab4.5_0002158g0140	Nitab4.5_0003323g0030
														Nitab4.5_0000960g0140		Nitab4.5_0009778g0010	Nitab4.5_0005235g0040	Nitab4.5_0002163g0070	Nitab4.5_0003328g0120
														Nitab4.5_0000965g0070		Nitab4.5_0009827g0030	Nitab4.5_0005255g0010	Nitab4.5_0002168g0010	Nitab4.5_0003390g0020
														Nitab4.5_0000966g0030		Nitab4.5_0009934g0020	Nitab4.5_0005359g0030	Nitab4.5_0002172g0020	Nitab4.5_0003394g0020
														Nitab4.5_0000967g0090		Nitab4.5_0009967g0020	Nitab4.5_0005366g0060	Nitab4.5_0002185g0130	Nitab4.5_0003401g0090
														Nitab4.5_0000974g0060		Nitab4.5_0009972g0030	Nitab4.5_0005382g0020	Nitab4.5_0002188g0020	Nitab4.5_0003402g0060
														Nitab4.5_0000977g0030		Nitab4.5_0009973g0020	Nitab4.5_0005390g0060	Nitab4.5_0002200g0010	Nitab4.5_0003408g0140
														Nitab4.5_0000977g0070		Nitab4.5_0009973g0030	Nitab4.5_0005400g0010	Nitab4.5_0002207g0040	Nitab4.5_0003410g0020
														Nitab4.5_0000977g0110		Nitab4.5_0010036g0010	Nitab4.5_0005400g0020	Nitab4.5_0002214g0060	Nitab4.5_0003419g0070
														Nitab4.5_0000978g0060		Nitab4.5_0010060g0010	Nitab4.5_0005401g0040	Nitab4.5_0002221g0060	Nitab4.5_0003431g0060
														Nitab4.5_0000978g0100		Nitab4.5_0010125g0040	Nitab4.5_0005466g0020	Nitab4.5_0002227g0010	Nitab4.5_0003464g0030
														Nitab4.5_0000979g0010		Nitab4.5_0010145g0010	Nitab4.5_0005555g0010	Nitab4.5_0002227g0020	Nitab4.5_0003473g0040
														Nitab4.5_0000980g0160		Nitab4.5_0010151g0040	Nitab4.5_0005558g0040	Nitab4.5_0002229g0010	Nitab4.5_0003495g0060
														Nitab4.5_0000980g0350		Nitab4.5_0010196g0040	Nitab4.5_0005572g0010	Nitab4.5_0002231g0030	Nitab4.5_0003514g0010
														Nitab4.5_0000982g0120		Nitab4.5_0010267g0020	Nitab4.5_0005582g0030	Nitab4.5_0002245g0100	Nitab4.5_0003567g0050
														Nitab4.5_0000986g0020		Nitab4.5_0010308g0030	Nitab4.5_0005583g0030	Nitab4.5_0002245g0110	Nitab4.5_0003571g0010
														Nitab4.5_0000986g0060		Nitab4.5_0010371g0010	Nitab4.5_0005583g0040	Nitab4.5_0002247g0120	Nitab4.5_0003587g0010
														Nitab4.5_0000987g0050		Nitab4.5_0010535g0010	Nitab4.5_0005609g0080	Nitab4.5_0002249g0080	Nitab4.5_0003600g0060
														Nitab4.5_0000990g0030		Nitab4.5_0010605g0020	Nitab4.5_0005632g0010	Nitab4.5_0002257g0010	Nitab4.5_0003610g0020
														Nitab4.5_0000993g0080		Nitab4.5_0010636g0020	Nitab4.5_0005648g0020	Nitab4.5_0002259g0060	Nitab4.5_0003611g0090
														Nitab4.5_0001000g0100		Nitab4.5_0010728g0020	Nitab4.5_0005668g0030	Nitab4.5_0002259g0080	Nitab4.5_0003619g0020
														Nitab4.5_0001002g0070		Nitab4.5_0010835g0010	Nitab4.5_0005672g0010	Nitab4.5_0002263g0060	Nitab4.5_0003620g0020
														Nitab4.5_0001003g0150		Nitab4.5_0011027g0010	Nitab4.5_0005710g0020	Nitab4.5_0002273g0010	Nitab4.5_0003624g0010
														Nitab4.5_0001005g0050		Nitab4.5_0011041g0010	Nitab4.5_0005716g0030	Nitab4.5_0002279g0100	Nitab4.5_0003626g0040
														Nitab4.5_0001013g0010		Nitab4.5_0011134g0010	Nitab4.5_0005755g0010	Nitab4.5_0002281g0010	Nitab4.5_0003627g0030
														Nitab4.5_0001013g0090		Nitab4.5_0011232g0010	Nitab4.5_0005755g0020	Nitab4.5_0002282g0040	Nitab4.5_0003636g0050
														Nitab4.5_0001014g0060		Nitab4.5_0011257g0010	Nitab4.5_0005766g0040	Nitab4.5_0002282g0090	Nitab4.5_0003648g0010
														Nitab4.5_0001014g0090		Nitab4.5_0011282g0010	Nitab4.5_0005767g0010	Nitab4.5_0002283g0030	Nitab4.5_0003654g0010
														Nitab4.5_0001022g0030		Nitab4.5_0011330g0010	Nitab4.5_0005805g0060	Nitab4.5_0002286g0090	Nitab4.5_0003668g0070
														Nitab4.5_0001024g0060		Nitab4.5_0011417g0010	Nitab4.5_0005814g0010	Nitab4.5_0002289g0010	Nitab4.5_0003719g0010
														Nitab4.5_0001028g0130		Nitab4.5_0011428g0010	Nitab4.5_0005838g0020	Nitab4.5_0002308g0030	Nitab4.5_0003722g0020
														Nitab4.5_0001030g0120		Nitab4.5_0011475g0010	Nitab4.5_0005900g0090	Nitab4.5_0002309g0080	Nitab4.5_0003722g0070
														Nitab4.5_0001031g0010		Nitab4.5_0011590g0010	Nitab4.5_0005923g0010	Nitab4.5_0002311g0020	Nitab4.5_0003726g0120
														Nitab4.5_0001031g0110		Nitab4.5_0011630g0010	Nitab4.5_0005928g0010	Nitab4.5_0002312g0030	Nitab4.5_0003745g0060
														Nitab4.5_0001031g0190		Nitab4.5_0011667g0010	Nitab4.5_0006007g0010	Nitab4.5_0002321g0060	Nitab4.5_0003765g0030
														Nitab4.5_0001035g0010		Nitab4.5_0011671g0020	Nitab4.5_0006014g0060	Nitab4.5_0002322g0110	Nitab4.5_0003771g0010
														Nitab4.5_0001036g0040		Nitab4.5_0011705g0010	Nitab4.5_0006055g0010	Nitab4.5_0002322g0170	Nitab4.5_0003771g0030
														Nitab4.5_0001036g0070		Nitab4.5_0011716g0020	Nitab4.5_0006055g0020	Nitab4.5_0002331g0050	Nitab4.5_0003774g0010
														Nitab4.5_0001041g0060		Nitab4.5_0011736g0010	Nitab4.5_0006055g0060	Nitab4.5_0002337g0010	Nitab4.5_0003794g0080
														Nitab4.5_0001041g0130		Nitab4.5_0011739g0010	Nitab4.5_0006069g0030	Nitab4.5_0002340g0070	Nitab4.5_0003795g0010
														Nitab4.5_0001043g0010		Nitab4.5_0011805g0020	Nitab4.5_0006073g0030	Nitab4.5_0002345g0080	Nitab4.5_0003818g0040
														Nitab4.5_0001044g0060		Nitab4.5_0011920g0010	Nitab4.5_0006088g0020	Nitab4.5_0002347g0080	Nitab4.5_0003819g0010
														Nitab4.5_0001047g0070		Nitab4.5_0012069g0010	Nitab4.5_0006089g0060	Nitab4.5_0002355g0010	Nitab4.5_0003820g0040
														Nitab4.5_0001047g0100		Nitab4.5_0012091g0020	Nitab4.5_0006090g0010	Nitab4.5_0002357g0010	Nitab4.5_0003822g0010
														Nitab4.5_0001050g0010		Nitab4.5_0012173g0010	Nitab4.5_0006090g0020	Nitab4.5_0002357g0020	Nitab4.5_0003848g0030
														Nitab4.5_0001051g0060		Nitab4.5_0012282g0030	Nitab4.5_0006133g0030	Nitab4.5_0002361g0080	Nitab4.5_0003858g0090
														Nitab4.5_0001051g0160		Nitab4.5_0012489g0020	Nitab4.5_0006134g0010	Nitab4.5_0002367g0040	Nitab4.5_0003885g0020
														Nitab4.5_0001056g0020		Nitab4.5_0012660g0020	Nitab4.5_0006192g0030	Nitab4.5_0002368g0020	Nitab4.5_0003886g0100
														Nitab4.5_0001059g0150		Nitab4.5_0012697g0010	Nitab4.5_0006201g0010	Nitab4.5_0002370g0050	Nitab4.5_0003906g0010
														Nitab4.5_0001066g0070		Nitab4.5_0012702g0010	Nitab4.5_0006204g0010	Nitab4.5_0002388g0050	Nitab4.5_0003930g0020
														Nitab4.5_0001068g0010		Nitab4.5_0012752g0010	Nitab4.5_0006224g0020	Nitab4.5_0002389g0040	Nitab4.5_0003969g0060
														Nitab4.5_0001069g0030		Nitab4.5_0012878g0010	Nitab4.5_0006238g0020	Nitab4.5_0002392g0090	Nitab4.5_0003981g0030
														Nitab4.5_0001070g0130		Nitab4.5_0012894g0010	Nitab4.5_0006239g0040	Nitab4.5_0002400g0010	Nitab4.5_0003981g0080
														Nitab4.5_0001071g0030		Nitab4.5_0013316g0010	Nitab4.5_0006269g0020	Nitab4.5_0002400g0040	Nitab4.5_0003987g0070
														Nitab4.5_0001074g0130		Nitab4.5_0013322g0010	Nitab4.5_0006272g0010	Nitab4.5_0002401g0010	Nitab4.5_0003991g0030
														Nitab4.5_0001076g0030		Nitab4.5_0013425g0030	Nitab4.5_0006338g0110	Nitab4.5_0002405g0050	Nitab4.5_0003995g0030
														Nitab4.5_0001078g0110		Nitab4.5_0013459g0010	Nitab4.5_0006367g0020	Nitab4.5_0002408g0020	Nitab4.5_0004010g0070
														Nitab4.5_0001079g0020		Nitab4.5_0013698g0010	Nitab4.5_0006369g0010	Nitab4.5_0002424g0020	Nitab4.5_0004013g0010
														Nitab4.5_0001084g0050		Nitab4.5_0013906g0010	Nitab4.5_0006379g0010	Nitab4.5_0002429g0080	Nitab4.5_0004013g0020
														Nitab4.5_0001088g0170		Nitab4.5_0014668g0010	Nitab4.5_0006383g0030	Nitab4.5_0002436g0020	Nitab4.5_0004032g0040
														Nitab4.5_0001088g0180		Nitab4.5_0015114g0020	Nitab4.5_0006389g0020	Nitab4.5_0002438g0030	Nitab4.5_0004036g0020
														Nitab4.5_0001088g0200		Nitab4.5_0015477g0010	Nitab4.5_0006392g0050	Nitab4.5_0002440g0040	Nitab4.5_0004045g0030
														Nitab4.5_0001091g0010		Nitab4.5_0015960g0020	Nitab4.5_0006475g0040	Nitab4.5_0002441g0010	Nitab4.5_0004055g0010
														Nitab4.5_0001091g0070		Nitab4.5_0016068g0010	Nitab4.5_0006493g0020	Nitab4.5_0002443g0040	Nitab4.5_0004059g0030
														Nitab4.5_0001096g0030		Nitab4.5_0017196g0010	Nitab4.5_0006507g0060	Nitab4.5_0002449g0010	Nitab4.5_0004062g0030
														Nitab4.5_0001097g0100		Nitab4.5_0018289g0010	Nitab4.5_0006508g0040	Nitab4.5_0002456g0130	Nitab4.5_0004070g0030
														Nitab4.5_0001102g0030		Nitab4.5_0018301g0010	Nitab4.5_0006543g0010	Nitab4.5_0002458g0030	Nitab4.5_0004087g0010
														Nitab4.5_0001106g0010		Nitab4.5_0018389g0010	Nitab4.5_0006642g0020	Nitab4.5_0002459g0050	Nitab4.5_0004088g0080
														Nitab4.5_0001108g0010		Nitab4.5_0019776g0010	Nitab4.5_0006650g0010	Nitab4.5_0002462g0090	Nitab4.5_0004106g0010
														Nitab4.5_0001109g0060		Nitab4.5_0019996g0010	Nitab4.5_0006691g0030	Nitab4.5_0002465g0050	Nitab4.5_0004129g0010
														Nitab4.5_0001110g0030		Nitab4.5_0020598g0010	Nitab4.5_0006706g0030	Nitab4.5_0002466g0010	Nitab4.5_0004141g0050
														Nitab4.5_0001110g0090		Nitab4.5_0021096g0010	Nitab4.5_0006718g0030	Nitab4.5_0002467g0060	Nitab4.5_0004144g0010
														Nitab4.5_0001110g0150		Nitab4.5_0021934g0010	Nitab4.5_0006766g0010	Nitab4.5_0002479g0010	Nitab4.5_0004154g0040
														Nitab4.5_0001112g0010		Nitab4.5_0022449g0010	Nitab4.5_0006766g0020	Nitab4.5_0002501g0010	Nitab4.5_0004161g0090
														Nitab4.5_0001114g0030		Nitab4.5_0022736g0010	Nitab4.5_0006833g0020	Nitab4.5_0002516g0050	Nitab4.5_0004166g0010
														Nitab4.5_0001119g0020		Nitab4.5_0022963g0010	Nitab4.5_0006852g0070	Nitab4.5_0002520g0060	Nitab4.5_0004168g0120
														Nitab4.5_0001119g0040		Nitab4.5_0023003g0010	Nitab4.5_0006870g0050	Nitab4.5_0002521g0010	Nitab4.5_0004168g0140
														Nitab4.5_0001121g0070		Nitab4.5_0023706g0010	Nitab4.5_0006870g0060	Nitab4.5_0002522g0070	Nitab4.5_0004181g0030
														Nitab4.5_0001122g0060		Nitab4.5_0023782g0010	Nitab4.5_0006888g0010	Nitab4.5_0002525g0030	Nitab4.5_0004194g0100
														Nitab4.5_0001122g0070		Nitab4.5_0024309g0010	Nitab4.5_0006905g0010	Nitab4.5_0002526g0070	Nitab4.5_0004217g0080
														Nitab4.5_0001122g0090		Nitab4.5_0025536g0010	Nitab4.5_0006914g0010	Nitab4.5_0002527g0020	Nitab4.5_0004222g0020
														Nitab4.5_0001122g0100		Nitab4.5_0025775g0010	Nitab4.5_0006916g0030	Nitab4.5_0002527g0040	Nitab4.5_0004227g0010
														Nitab4.5_0001127g0080		Nitab4.5_0026398g0010	Nitab4.5_0006973g0030	Nitab4.5_0002536g0030	Nitab4.5_0004234g0120
														Nitab4.5_0001128g0120		Nitab4.5_0027851g0010	Nitab4.5_0006988g0020	Nitab4.5_0002541g0050	Nitab4.5_0004236g0010
														Nitab4.5_0001133g0020		Nitab4.5_0027922g0010	Nitab4.5_0006994g0040	Nitab4.5_0002543g0010	Nitab4.5_0004286g0050
														Nitab4.5_0001135g0010		Nitab4.5_0028267g0010	Nitab4.5_0006999g0030	Nitab4.5_0002546g0050	Nitab4.5_0004294g0030
														Nitab4.5_0001137g0050		Nitab4.5_0029531g0010	Nitab4.5_0007026g0010	Nitab4.5_0002548g0010	Nitab4.5_0004311g0010
														Nitab4.5_0001149g0030			Nitab4.5_0007026g0060	Nitab4.5_0002552g0010	Nitab4.5_0004330g0030
														Nitab4.5_0001157g0020			Nitab4.5_0007034g0020	Nitab4.5_0002553g0030	Nitab4.5_0004355g0050
														Nitab4.5_0001158g0100			Nitab4.5_0007068g0040	Nitab4.5_0002567g0050	Nitab4.5_0004359g0040
														Nitab4.5_0001160g0120			Nitab4.5_0007074g0020	Nitab4.5_0002574g0060	Nitab4.5_0004360g0050
														Nitab4.5_0001163g0150			Nitab4.5_0007090g0010	Nitab4.5_0002576g0010	Nitab4.5_0004362g0040
														Nitab4.5_0001167g0080			Nitab4.5_0007090g0020	Nitab4.5_0002577g0070	Nitab4.5_0004386g0020
														Nitab4.5_0001175g0140			Nitab4.5_0007166g0040	Nitab4.5_0002588g0020	Nitab4.5_0004389g0010
														Nitab4.5_0001178g0020			Nitab4.5_0007185g0030	Nitab4.5_0002589g0060	Nitab4.5_0004398g0080
														Nitab4.5_0001180g0150			Nitab4.5_0007185g0070	Nitab4.5_0002589g0070	Nitab4.5_0004400g0010
														Nitab4.5_0001184g0040			Nitab4.5_0007189g0040	Nitab4.5_0002590g0030	Nitab4.5_0004402g0040
														Nitab4.5_0001184g0090			Nitab4.5_0007225g0010	Nitab4.5_0002605g0040	Nitab4.5_0004411g0050
														Nitab4.5_0001185g0050			Nitab4.5_0007254g0040	Nitab4.5_0002612g0100	Nitab4.5_0004415g0010
														Nitab4.5_0001186g0030			Nitab4.5_0007274g0010	Nitab4.5_0002626g0020	Nitab4.5_0004415g0050
														Nitab4.5_0001194g0040			Nitab4.5_0007346g0060	Nitab4.5_0002627g0010	Nitab4.5_0004423g0010
														Nitab4.5_0001200g0040			Nitab4.5_0007351g0020	Nitab4.5_0002637g0060	Nitab4.5_0004428g0020
														Nitab4.5_0001200g0050			Nitab4.5_0007375g0020	Nitab4.5_0002637g0090	Nitab4.5_0004441g0010
														Nitab4.5_0001204g0100			Nitab4.5_0007402g0050	Nitab4.5_0002660g0010	Nitab4.5_0004464g0010
														Nitab4.5_0001204g0110			Nitab4.5_0007436g0010	Nitab4.5_0002671g0090	Nitab4.5_0004465g0040
														Nitab4.5_0001208g0090			Nitab4.5_0007465g0010	Nitab4.5_0002671g0110	Nitab4.5_0004480g0050
														Nitab4.5_0001213g0060			Nitab4.5_0007468g0020	Nitab4.5_0002673g0040	Nitab4.5_0004516g0020
														Nitab4.5_0001214g0030			Nitab4.5_0007475g0010	Nitab4.5_0002682g0130	Nitab4.5_0004522g0020
														Nitab4.5_0001215g0120			Nitab4.5_0007562g0020	Nitab4.5_0002692g0060	Nitab4.5_0004528g0020
														Nitab4.5_0001216g0060			Nitab4.5_0007575g0010	Nitab4.5_0002694g0020	Nitab4.5_0004530g0090
														Nitab4.5_0001218g0020			Nitab4.5_0007588g0010	Nitab4.5_0002700g0150	Nitab4.5_0004581g0030
														Nitab4.5_0001223g0020			Nitab4.5_0007598g0010	Nitab4.5_0002712g0010	Nitab4.5_0004605g0090
														Nitab4.5_0001229g0120			Nitab4.5_0007598g0030	Nitab4.5_0002712g0020	Nitab4.5_0004625g0020
														Nitab4.5_0001233g0010			Nitab4.5_0007622g0050	Nitab4.5_0002719g0080	Nitab4.5_0004643g0020
														Nitab4.5_0001234g0010			Nitab4.5_0007628g0040	Nitab4.5_0002733g0050	Nitab4.5_0004644g0070
														Nitab4.5_0001237g0040			Nitab4.5_0007691g0010	Nitab4.5_0002737g0090	Nitab4.5_0004645g0010
														Nitab4.5_0001239g0040			Nitab4.5_0007722g0040	Nitab4.5_0002739g0070	Nitab4.5_0004657g0030
														Nitab4.5_0001248g0010			Nitab4.5_0007755g0020	Nitab4.5_0002740g0110	Nitab4.5_0004658g0040
														Nitab4.5_0001256g0060			Nitab4.5_0007792g0010	Nitab4.5_0002748g0020	Nitab4.5_0004679g0090
														Nitab4.5_0001266g0060			Nitab4.5_0007816g0010	Nitab4.5_0002755g0080	Nitab4.5_0004689g0010
														Nitab4.5_0001270g0120			Nitab4.5_0007832g0030	Nitab4.5_0002760g0070	Nitab4.5_0004694g0040
														Nitab4.5_0001271g0010			Nitab4.5_0007835g0010	Nitab4.5_0002765g0020	Nitab4.5_0004708g0050
														Nitab4.5_0001277g0070			Nitab4.5_0007838g0050	Nitab4.5_0002771g0030	Nitab4.5_0004718g0010
														Nitab4.5_0001277g0080			Nitab4.5_0007853g0020	Nitab4.5_0002782g0100	Nitab4.5_0004730g0030
														Nitab4.5_0001280g0010			Nitab4.5_0007860g0010	Nitab4.5_0002783g0040	Nitab4.5_0004738g0080
														Nitab4.5_0001284g0110			Nitab4.5_0007958g0020	Nitab4.5_0002785g0010	Nitab4.5_0004748g0020
														Nitab4.5_0001284g0120			Nitab4.5_0008015g0010	Nitab4.5_0002786g0110	Nitab4.5_0004756g0030
														Nitab4.5_0001288g0190			Nitab4.5_0008039g0010	Nitab4.5_0002791g0060	Nitab4.5_0004772g0030
														Nitab4.5_0001291g0070			Nitab4.5_0008080g0010	Nitab4.5_0002791g0070	Nitab4.5_0004786g0040
														Nitab4.5_0001294g0030			Nitab4.5_0008124g0020	Nitab4.5_0002793g0050	Nitab4.5_0004807g0040
														Nitab4.5_0001296g0120			Nitab4.5_0008126g0020	Nitab4.5_0002801g0020	Nitab4.5_0004814g0010
														Nitab4.5_0001297g0050			Nitab4.5_0008128g0030	Nitab4.5_0002810g0020	Nitab4.5_0004821g0020
														Nitab4.5_0001299g0080			Nitab4.5_0008156g0030	Nitab4.5_0002822g0010	Nitab4.5_0004821g0040
														Nitab4.5_0001301g0160			Nitab4.5_0008173g0020	Nitab4.5_0002823g0070	Nitab4.5_0004833g0020
														Nitab4.5_0001302g0040			Nitab4.5_0008189g0010	Nitab4.5_0002827g0030	Nitab4.5_0004848g0080
														Nitab4.5_0001304g0030			Nitab4.5_0008213g0070	Nitab4.5_0002838g0050	Nitab4.5_0004860g0010
														Nitab4.5_0001310g0030			Nitab4.5_0008220g0010	Nitab4.5_0002854g0070	Nitab4.5_0004861g0040
														Nitab4.5_0001315g0310			Nitab4.5_0008224g0010	Nitab4.5_0002860g0010	Nitab4.5_0004868g0030
														Nitab4.5_0001317g0050			Nitab4.5_0008239g0010	Nitab4.5_0002862g0020	Nitab4.5_0004881g0010
														Nitab4.5_0001318g0010			Nitab4.5_0008253g0030	Nitab4.5_0002865g0020	Nitab4.5_0004889g0010
														Nitab4.5_0001318g0050			Nitab4.5_0008255g0010	Nitab4.5_0002892g0020	Nitab4.5_0004920g0030
														Nitab4.5_0001323g0130			Nitab4.5_0008292g0010	Nitab4.5_0002896g0020	Nitab4.5_0004933g0020
														Nitab4.5_0001323g0170			Nitab4.5_0008292g0020	Nitab4.5_0002904g0100	Nitab4.5_0004937g0060
														Nitab4.5_0001324g0080			Nitab4.5_0008348g0010	Nitab4.5_0002906g0080	Nitab4.5_0004940g0020
														Nitab4.5_0001329g0040			Nitab4.5_0008372g0010	Nitab4.5_0002926g0040	Nitab4.5_0004944g0030
														Nitab4.5_0001332g0010			Nitab4.5_0008389g0010	Nitab4.5_0002932g0010	Nitab4.5_0004946g0040
														Nitab4.5_0001333g0020			Nitab4.5_0008488g0010	Nitab4.5_0002944g0170	Nitab4.5_0004969g0050
														Nitab4.5_0001336g0040			Nitab4.5_0008522g0060	Nitab4.5_0002948g0020	Nitab4.5_0004979g0140
														Nitab4.5_0001336g0050			Nitab4.5_0008523g0030	Nitab4.5_0002963g0010	Nitab4.5_0004983g0040
														Nitab4.5_0001338g0100			Nitab4.5_0008525g0010	Nitab4.5_0002971g0010	Nitab4.5_0005018g0030
														Nitab4.5_0001349g0130			Nitab4.5_0008527g0010	Nitab4.5_0002978g0030	Nitab4.5_0005029g0030
														Nitab4.5_0001356g0060			Nitab4.5_0008527g0020	Nitab4.5_0002980g0050	Nitab4.5_0005030g0010
														Nitab4.5_0001356g0110			Nitab4.5_0008533g0020	Nitab4.5_0002989g0010	Nitab4.5_0005031g0060
														Nitab4.5_0001364g0010			Nitab4.5_0008539g0020	Nitab4.5_0002998g0040	Nitab4.5_0005038g0020
														Nitab4.5_0001364g0020			Nitab4.5_0008552g0030	Nitab4.5_0003012g0060	Nitab4.5_0005045g0010
														Nitab4.5_0001365g0080			Nitab4.5_0008696g0020	Nitab4.5_0003022g0060	Nitab4.5_0005050g0050
														Nitab4.5_0001366g0090			Nitab4.5_0008728g0010	Nitab4.5_0003030g0070	Nitab4.5_0005079g0040
														Nitab4.5_0001368g0010			Nitab4.5_0008928g0010	Nitab4.5_0003032g0010	Nitab4.5_0005090g0030
														Nitab4.5_0001371g0040			Nitab4.5_0008928g0030	Nitab4.5_0003035g0030	Nitab4.5_0005133g0020
														Nitab4.5_0001372g0020			Nitab4.5_0008962g0050	Nitab4.5_0003040g0020	Nitab4.5_0005133g0050
														Nitab4.5_0001374g0220			Nitab4.5_0009011g0010	Nitab4.5_0003041g0050	Nitab4.5_0005159g0040
														Nitab4.5_0001376g0060			Nitab4.5_0009174g0010	Nitab4.5_0003058g0020	Nitab4.5_0005164g0030
														Nitab4.5_0001380g0020			Nitab4.5_0009181g0010	Nitab4.5_0003058g0030	Nitab4.5_0005167g0100
														Nitab4.5_0001381g0190			Nitab4.5_0009224g0010	Nitab4.5_0003066g0030	Nitab4.5_0005189g0010
														Nitab4.5_0001383g0040			Nitab4.5_0009232g0030	Nitab4.5_0003069g0090	Nitab4.5_0005191g0060
														Nitab4.5_0001392g0070			Nitab4.5_0009234g0010	Nitab4.5_0003073g0020	Nitab4.5_0005193g0020
														Nitab4.5_0001413g0050			Nitab4.5_0009281g0010	Nitab4.5_0003076g0010	Nitab4.5_0005195g0040
														Nitab4.5_0001416g0040			Nitab4.5_0009284g0020	Nitab4.5_0003084g0040	Nitab4.5_0005212g0010
														Nitab4.5_0001417g0090			Nitab4.5_0009332g0010	Nitab4.5_0003085g0020	Nitab4.5_0005227g0010
														Nitab4.5_0001417g0100			Nitab4.5_0009364g0010	Nitab4.5_0003086g0040	Nitab4.5_0005246g0010
														Nitab4.5_0001427g0090			Nitab4.5_0009493g0010	Nitab4.5_0003088g0020	Nitab4.5_0005249g0050
														Nitab4.5_0001428g0140			Nitab4.5_0009514g0070	Nitab4.5_0003090g0030	Nitab4.5_0005266g0020
														Nitab4.5_0001429g0010			Nitab4.5_0009607g0010	Nitab4.5_0003100g0070	Nitab4.5_0005282g0020
														Nitab4.5_0001437g0200			Nitab4.5_0009672g0010	Nitab4.5_0003109g0010	Nitab4.5_0005344g0020
														Nitab4.5_0001437g0220			Nitab4.5_0009737g0010	Nitab4.5_0003113g0100	Nitab4.5_0005359g0030
														Nitab4.5_0001440g0060			Nitab4.5_0009751g0020	Nitab4.5_0003114g0090	Nitab4.5_0005371g0020
														Nitab4.5_0001441g0030			Nitab4.5_0009795g0010	Nitab4.5_0003127g0040	Nitab4.5_0005385g0030
														Nitab4.5_0001441g0060			Nitab4.5_0009795g0020	Nitab4.5_0003168g0010	Nitab4.5_0005400g0020
														Nitab4.5_0001453g0100			Nitab4.5_0009812g0030	Nitab4.5_0003170g0010	Nitab4.5_0005402g0020
														Nitab4.5_0001461g0050			Nitab4.5_0009827g0030	Nitab4.5_0003171g0010	Nitab4.5_0005404g0030
														Nitab4.5_0001461g0060			Nitab4.5_0009842g0020	Nitab4.5_0003174g0040	Nitab4.5_0005409g0030
														Nitab4.5_0001461g0070			Nitab4.5_0009862g0020	Nitab4.5_0003179g0030	Nitab4.5_0005428g0060
														Nitab4.5_0001468g0070			Nitab4.5_0009867g0010	Nitab4.5_0003183g0010	Nitab4.5_0005432g0030
														Nitab4.5_0001472g0090			Nitab4.5_0009934g0020	Nitab4.5_0003188g0010	Nitab4.5_0005441g0020
														Nitab4.5_0001474g0050			Nitab4.5_0009942g0020	Nitab4.5_0003201g0020	Nitab4.5_0005445g0020
														Nitab4.5_0001477g0050			Nitab4.5_0009945g0020	Nitab4.5_0003205g0040	Nitab4.5_0005504g0030
														Nitab4.5_0001478g0040			Nitab4.5_0009946g0020	Nitab4.5_0003209g0030	Nitab4.5_0005525g0060
														Nitab4.5_0001478g0070			Nitab4.5_0009967g0020	Nitab4.5_0003212g0030	Nitab4.5_0005558g0040
														Nitab4.5_0001489g0010			Nitab4.5_0009972g0010	Nitab4.5_0003244g0020	Nitab4.5_0005559g0010
														Nitab4.5_0001492g0080			Nitab4.5_0009972g0030	Nitab4.5_0003247g0010	Nitab4.5_0005562g0010
														Nitab4.5_0001494g0010			Nitab4.5_0009973g0020	Nitab4.5_0003249g0020	Nitab4.5_0005579g0030
														Nitab4.5_0001494g0060			Nitab4.5_0009996g0020	Nitab4.5_0003250g0020	Nitab4.5_0005582g0030
														Nitab4.5_0001495g0070			Nitab4.5_0010060g0020	Nitab4.5_0003251g0040	Nitab4.5_0005583g0030
														Nitab4.5_0001495g0130			Nitab4.5_0010063g0010	Nitab4.5_0003259g0090	Nitab4.5_0005583g0040
														Nitab4.5_0001504g0090			Nitab4.5_0010125g0040	Nitab4.5_0003280g0010	Nitab4.5_0005587g0040
														Nitab4.5_0001505g0020			Nitab4.5_0010145g0010	Nitab4.5_0003281g0080	Nitab4.5_0005609g0020
														Nitab4.5_0001511g0020			Nitab4.5_0010151g0020	Nitab4.5_0003281g0090	Nitab4.5_0005609g0080
														Nitab4.5_0001513g0010			Nitab4.5_0010196g0040	Nitab4.5_0003282g0010	Nitab4.5_0005615g0010
														Nitab4.5_0001514g0060			Nitab4.5_0010219g0010	Nitab4.5_0003284g0010	Nitab4.5_0005626g0030
														Nitab4.5_0001519g0010			Nitab4.5_0010254g0020	Nitab4.5_0003284g0040	Nitab4.5_0005648g0020
														Nitab4.5_0001519g0160			Nitab4.5_0010295g0010	Nitab4.5_0003295g0120	Nitab4.5_0005651g0050
														Nitab4.5_0001519g0210			Nitab4.5_0010345g0010	Nitab4.5_0003295g0130	Nitab4.5_0005673g0010
														Nitab4.5_0001524g0030			Nitab4.5_0010347g0030	Nitab4.5_0003298g0050	Nitab4.5_0005691g0020
														Nitab4.5_0001526g0030			Nitab4.5_0010408g0030	Nitab4.5_0003298g0070	Nitab4.5_0005700g0010
														Nitab4.5_0001526g0050			Nitab4.5_0010461g0020	Nitab4.5_0003300g0080	Nitab4.5_0005710g0010
														Nitab4.5_0001529g0020			Nitab4.5_0010472g0010	Nitab4.5_0003309g0070	Nitab4.5_0005716g0030
														Nitab4.5_0001536g0060			Nitab4.5_0010554g0030	Nitab4.5_0003313g0050	Nitab4.5_0005728g0020
														Nitab4.5_0001541g0050			Nitab4.5_0010636g0020	Nitab4.5_0003328g0040	Nitab4.5_0005744g0010
														Nitab4.5_0001542g0060			Nitab4.5_0010768g0030	Nitab4.5_0003328g0120	Nitab4.5_0005760g0020
														Nitab4.5_0001551g0070			Nitab4.5_0010781g0010	Nitab4.5_0003335g0080	Nitab4.5_0005764g0010
														Nitab4.5_0001554g0070			Nitab4.5_0010809g0020	Nitab4.5_0003341g0040	Nitab4.5_0005765g0010
														Nitab4.5_0001556g0100			Nitab4.5_0010835g0010	Nitab4.5_0003343g0040	Nitab4.5_0005766g0040
														Nitab4.5_0001561g0100			Nitab4.5_0010919g0010	Nitab4.5_0003346g0070	Nitab4.5_0005786g0030
														Nitab4.5_0001565g0040			Nitab4.5_0011041g0010	Nitab4.5_0003347g0030	Nitab4.5_0005800g0010
														Nitab4.5_0001568g0130			Nitab4.5_0011108g0010	Nitab4.5_0003373g0020	Nitab4.5_0005885g0010
														Nitab4.5_0001569g0140			Nitab4.5_0011134g0010	Nitab4.5_0003373g0060	Nitab4.5_0005900g0010
														Nitab4.5_0001569g0160			Nitab4.5_0011135g0040	Nitab4.5_0003376g0060	Nitab4.5_0005908g0080
														Nitab4.5_0001572g0030			Nitab4.5_0011186g0020	Nitab4.5_0003376g0080	Nitab4.5_0005916g0030
														Nitab4.5_0001574g0020			Nitab4.5_0011210g0010	Nitab4.5_0003380g0010	Nitab4.5_0005925g0020
														Nitab4.5_0001576g0060			Nitab4.5_0011212g0020	Nitab4.5_0003394g0020	Nitab4.5_0005932g0030
														Nitab4.5_0001578g0030			Nitab4.5_0011256g0010	Nitab4.5_0003401g0090	Nitab4.5_0005940g0010
														Nitab4.5_0001579g0060			Nitab4.5_0011301g0040	Nitab4.5_0003402g0050	Nitab4.5_0005985g0050
														Nitab4.5_0001583g0150			Nitab4.5_0011320g0010	Nitab4.5_0003408g0140	Nitab4.5_0005998g0010
														Nitab4.5_0001585g0070			Nitab4.5_0011321g0010	Nitab4.5_0003417g0010	Nitab4.5_0006022g0010
														Nitab4.5_0001591g0020			Nitab4.5_0011338g0010	Nitab4.5_0003419g0110	Nitab4.5_0006055g0010
														Nitab4.5_0001599g0220			Nitab4.5_0011386g0010	Nitab4.5_0003434g0010	Nitab4.5_0006071g0090
														Nitab4.5_0001600g0060			Nitab4.5_0011405g0010	Nitab4.5_0003436g0010	Nitab4.5_0006073g0030
														Nitab4.5_0001604g0120			Nitab4.5_0011407g0020	Nitab4.5_0003441g0040	Nitab4.5_0006081g0010
														Nitab4.5_0001607g0020			Nitab4.5_0011414g0010	Nitab4.5_0003452g0010	Nitab4.5_0006089g0060
														Nitab4.5_0001607g0030			Nitab4.5_0011417g0010	Nitab4.5_0003463g0060	Nitab4.5_0006094g0010
														Nitab4.5_0001610g0040			Nitab4.5_0011475g0010	Nitab4.5_0003464g0030	Nitab4.5_0006132g0030
														Nitab4.5_0001612g0020			Nitab4.5_0011498g0010	Nitab4.5_0003488g0060	Nitab4.5_0006134g0010
														Nitab4.5_0001612g0080			Nitab4.5_0011528g0010	Nitab4.5_0003495g0010	Nitab4.5_0006152g0030
														Nitab4.5_0001614g0060			Nitab4.5_0011561g0010	Nitab4.5_0003496g0010	Nitab4.5_0006192g0030
														Nitab4.5_0001614g0180			Nitab4.5_0011590g0010	Nitab4.5_0003514g0010	Nitab4.5_0006222g0020
														Nitab4.5_0001616g0060			Nitab4.5_0011620g0010	Nitab4.5_0003514g0040	Nitab4.5_0006269g0030
														Nitab4.5_0001617g0020			Nitab4.5_0011630g0010	Nitab4.5_0003537g0020	Nitab4.5_0006294g0070
														Nitab4.5_0001617g0050			Nitab4.5_0011667g0010	Nitab4.5_0003554g0020	Nitab4.5_0006307g0010
														Nitab4.5_0001617g0070			Nitab4.5_0011671g0010	Nitab4.5_0003577g0040	Nitab4.5_0006317g0040
														Nitab4.5_0001618g0220			Nitab4.5_0011671g0020	Nitab4.5_0003587g0010	Nitab4.5_0006360g0020
														Nitab4.5_0001618g0270			Nitab4.5_0011705g0010	Nitab4.5_0003588g0050	Nitab4.5_0006376g0040
														Nitab4.5_0001622g0050			Nitab4.5_0011739g0010	Nitab4.5_0003590g0010	Nitab4.5_0006378g0040
														Nitab4.5_0001622g0090			Nitab4.5_0011791g0010	Nitab4.5_0003602g0030	Nitab4.5_0006392g0050
														Nitab4.5_0001624g0040			Nitab4.5_0011805g0020	Nitab4.5_0003609g0010	Nitab4.5_0006411g0010
														Nitab4.5_0001628g0030			Nitab4.5_0011810g0030	Nitab4.5_0003610g0020	Nitab4.5_0006429g0030
														Nitab4.5_0001629g0060			Nitab4.5_0011858g0010	Nitab4.5_0003611g0030	Nitab4.5_0006429g0060
														Nitab4.5_0001634g0050			Nitab4.5_0011903g0010	Nitab4.5_0003620g0020	Nitab4.5_0006443g0010
														Nitab4.5_0001634g0060			Nitab4.5_0012018g0010	Nitab4.5_0003621g0010	Nitab4.5_0006475g0040
														Nitab4.5_0001637g0110			Nitab4.5_0012027g0010	Nitab4.5_0003624g0010	Nitab4.5_0006505g0030
														Nitab4.5_0001640g0020			Nitab4.5_0012046g0010	Nitab4.5_0003628g0030	Nitab4.5_0006507g0060
														Nitab4.5_0001643g0100			Nitab4.5_0012069g0010	Nitab4.5_0003639g0010	Nitab4.5_0006539g0040
														Nitab4.5_0001644g0100			Nitab4.5_0012102g0010	Nitab4.5_0003640g0010	Nitab4.5_0006589g0030
														Nitab4.5_0001652g0150			Nitab4.5_0012102g0020	Nitab4.5_0003648g0010	Nitab4.5_0006594g0020
														Nitab4.5_0001654g0010			Nitab4.5_0012222g0020	Nitab4.5_0003654g0010	Nitab4.5_0006605g0040
														Nitab4.5_0001654g0020			Nitab4.5_0012292g0020	Nitab4.5_0003658g0010	Nitab4.5_0006634g0010
														Nitab4.5_0001655g0210			Nitab4.5_0012411g0010	Nitab4.5_0003699g0010	Nitab4.5_0006672g0010
														Nitab4.5_0001657g0010			Nitab4.5_0012489g0020	Nitab4.5_0003715g0040	Nitab4.5_0006685g0020
														Nitab4.5_0001658g0020			Nitab4.5_0012660g0020	Nitab4.5_0003716g0110	Nitab4.5_0006691g0030
														Nitab4.5_0001659g0030			Nitab4.5_0012697g0010	Nitab4.5_0003719g0050	Nitab4.5_0006699g0010
														Nitab4.5_0001659g0160			Nitab4.5_0012752g0010	Nitab4.5_0003743g0010	Nitab4.5_0006706g0030
														Nitab4.5_0001662g0020			Nitab4.5_0012800g0010	Nitab4.5_0003751g0010	Nitab4.5_0006718g0030
														Nitab4.5_0001662g0030			Nitab4.5_0012878g0010	Nitab4.5_0003757g0010	Nitab4.5_0006729g0020
														Nitab4.5_0001663g0020			Nitab4.5_0012894g0010	Nitab4.5_0003759g0050	Nitab4.5_0006729g0030
														Nitab4.5_0001664g0080			Nitab4.5_0012895g0010	Nitab4.5_0003768g0020	Nitab4.5_0006769g0040
														Nitab4.5_0001666g0010			Nitab4.5_0012929g0010	Nitab4.5_0003774g0010	Nitab4.5_0006778g0010
														Nitab4.5_0001668g0080			Nitab4.5_0012932g0010	Nitab4.5_0003779g0100	Nitab4.5_0006780g0020
														Nitab4.5_0001668g0150			Nitab4.5_0013087g0020	Nitab4.5_0003779g0120	Nitab4.5_0006802g0020
														Nitab4.5_0001672g0130			Nitab4.5_0013243g0020	Nitab4.5_0003791g0020	Nitab4.5_0006804g0010
														Nitab4.5_0001683g0050			Nitab4.5_0013316g0010	Nitab4.5_0003816g0100	Nitab4.5_0006812g0010
														Nitab4.5_0001684g0020			Nitab4.5_0013322g0010	Nitab4.5_0003820g0040	Nitab4.5_0006815g0010
														Nitab4.5_0001684g0040			Nitab4.5_0013433g0010	Nitab4.5_0003828g0030	Nitab4.5_0006826g0010
														Nitab4.5_0001688g0070			Nitab4.5_0013465g0010	Nitab4.5_0003848g0020	Nitab4.5_0006833g0020
														Nitab4.5_0001690g0020			Nitab4.5_0013698g0010	Nitab4.5_0003858g0070	Nitab4.5_0006843g0010
														Nitab4.5_0001699g0010			Nitab4.5_0014188g0010	Nitab4.5_0003884g0060	Nitab4.5_0006852g0070
														Nitab4.5_0001699g0020			Nitab4.5_0014729g0010	Nitab4.5_0003885g0020	Nitab4.5_0006870g0010
														Nitab4.5_0001699g0070			Nitab4.5_0015114g0020	Nitab4.5_0003902g0040	Nitab4.5_0006882g0050
														Nitab4.5_0001701g0030			Nitab4.5_0015619g0010	Nitab4.5_0003906g0010	Nitab4.5_0006887g0020
														Nitab4.5_0001701g0210			Nitab4.5_0015894g0010	Nitab4.5_0003906g0030	Nitab4.5_0006905g0010
														Nitab4.5_0001703g0040			Nitab4.5_0016068g0010	Nitab4.5_0003906g0050	Nitab4.5_0006924g0010
														Nitab4.5_0001706g0010			Nitab4.5_0016172g0010	Nitab4.5_0003919g0010	Nitab4.5_0006928g0020
														Nitab4.5_0001707g0050			Nitab4.5_0017196g0010	Nitab4.5_0003930g0030	Nitab4.5_0006928g0030
														Nitab4.5_0001709g0010			Nitab4.5_0018164g0010	Nitab4.5_0003953g0010	Nitab4.5_0006950g0010
														Nitab4.5_0001709g0030			Nitab4.5_0018289g0010	Nitab4.5_0003967g0020	Nitab4.5_0006988g0020
														Nitab4.5_0001710g0020			Nitab4.5_0018301g0010	Nitab4.5_0003969g0060	Nitab4.5_0006994g0090
														Nitab4.5_0001711g0010			Nitab4.5_0018389g0010	Nitab4.5_0003981g0030	Nitab4.5_0006996g0030
														Nitab4.5_0001711g0040			Nitab4.5_0018960g0010	Nitab4.5_0003981g0080	Nitab4.5_0006998g0030
														Nitab4.5_0001711g0050			Nitab4.5_0019776g0010	Nitab4.5_0003983g0030	Nitab4.5_0006998g0040
														Nitab4.5_0001714g0060			Nitab4.5_0019996g0010	Nitab4.5_0003995g0030	Nitab4.5_0007012g0020
														Nitab4.5_0001715g0040			Nitab4.5_0020598g0010	Nitab4.5_0003998g0010	Nitab4.5_0007034g0020
														Nitab4.5_0001715g0090			Nitab4.5_0021258g0010	Nitab4.5_0004010g0020	Nitab4.5_0007056g0010
														Nitab4.5_0001725g0120			Nitab4.5_0022042g0010	Nitab4.5_0004010g0070	Nitab4.5_0007060g0030
														Nitab4.5_0001727g0170			Nitab4.5_0022963g0010	Nitab4.5_0004011g0010	Nitab4.5_0007063g0070
														Nitab4.5_0001730g0060			Nitab4.5_0023385g0010	Nitab4.5_0004013g0010	Nitab4.5_0007068g0040
														Nitab4.5_0001731g0020			Nitab4.5_0024309g0010	Nitab4.5_0004013g0020	Nitab4.5_0007099g0040
														Nitab4.5_0001739g0070			Nitab4.5_0026891g0010	Nitab4.5_0004023g0020	Nitab4.5_0007140g0010
														Nitab4.5_0001744g0070			Nitab4.5_0027320g0010	Nitab4.5_0004030g0030	Nitab4.5_0007174g0020
														Nitab4.5_0001748g0040				Nitab4.5_0004030g0050	Nitab4.5_0007178g0030
														Nitab4.5_0001748g0050				Nitab4.5_0004036g0020	Nitab4.5_0007185g0030
														Nitab4.5_0001749g0070				Nitab4.5_0004045g0030	Nitab4.5_0007189g0040
														Nitab4.5_0001750g0050				Nitab4.5_0004045g0040	Nitab4.5_0007204g0010
														Nitab4.5_0001752g0010				Nitab4.5_0004054g0020	Nitab4.5_0007206g0010
														Nitab4.5_0001752g0040				Nitab4.5_0004059g0030	Nitab4.5_0007221g0030
														Nitab4.5_0001758g0020				Nitab4.5_0004094g0030	Nitab4.5_0007255g0040
														Nitab4.5_0001759g0070				Nitab4.5_0004095g0050	Nitab4.5_0007255g0050
														Nitab4.5_0001763g0070				Nitab4.5_0004106g0010	Nitab4.5_0007274g0010
														Nitab4.5_0001764g0020				Nitab4.5_0004108g0020	Nitab4.5_0007280g0010
														Nitab4.5_0001764g0070				Nitab4.5_0004118g0110	Nitab4.5_0007295g0010
														Nitab4.5_0001764g0140				Nitab4.5_0004123g0030	Nitab4.5_0007295g0030
														Nitab4.5_0001769g0160				Nitab4.5_0004144g0010	Nitab4.5_0007303g0020
														Nitab4.5_0001772g0040				Nitab4.5_0004150g0010	Nitab4.5_0007322g0010
														Nitab4.5_0001777g0040				Nitab4.5_0004150g0030	Nitab4.5_0007375g0010
														Nitab4.5_0001780g0140				Nitab4.5_0004164g0010	Nitab4.5_0007380g0040
														Nitab4.5_0001781g0130				Nitab4.5_0004173g0010	Nitab4.5_0007427g0010
														Nitab4.5_0001783g0090				Nitab4.5_0004173g0030	Nitab4.5_0007436g0010
														Nitab4.5_0001786g0040				Nitab4.5_0004194g0100	Nitab4.5_0007466g0010
														Nitab4.5_0001787g0010				Nitab4.5_0004200g0090	Nitab4.5_0007468g0020
														Nitab4.5_0001789g0110				Nitab4.5_0004201g0030	Nitab4.5_0007473g0030
														Nitab4.5_0001791g0030				Nitab4.5_0004222g0020	Nitab4.5_0007474g0020
														Nitab4.5_0001794g0080				Nitab4.5_0004234g0080	Nitab4.5_0007475g0010
														Nitab4.5_0001800g0050				Nitab4.5_0004234g0120	Nitab4.5_0007494g0040
														Nitab4.5_0001801g0080				Nitab4.5_0004241g0060	Nitab4.5_0007513g0010
														Nitab4.5_0001803g0050				Nitab4.5_0004246g0040	Nitab4.5_0007564g0010
														Nitab4.5_0001810g0030				Nitab4.5_0004249g0020	Nitab4.5_0007573g0030
														Nitab4.5_0001810g0050				Nitab4.5_0004259g0030	Nitab4.5_0007598g0030
														Nitab4.5_0001814g0020				Nitab4.5_0004269g0060	Nitab4.5_0007628g0040
														Nitab4.5_0001816g0200				Nitab4.5_0004286g0050	Nitab4.5_0007641g0020
														Nitab4.5_0001817g0010				Nitab4.5_0004304g0040	Nitab4.5_0007650g0040
														Nitab4.5_0001819g0100				Nitab4.5_0004330g0020	Nitab4.5_0007661g0020
														Nitab4.5_0001820g0070				Nitab4.5_0004334g0030	Nitab4.5_0007671g0030
														Nitab4.5_0001840g0060				Nitab4.5_0004334g0070	Nitab4.5_0007698g0020
														Nitab4.5_0001842g0060				Nitab4.5_0004338g0050	Nitab4.5_0007722g0010
														Nitab4.5_0001849g0020				Nitab4.5_0004348g0050	Nitab4.5_0007732g0060
														Nitab4.5_0001850g0040				Nitab4.5_0004355g0040	Nitab4.5_0007740g0010
														Nitab4.5_0001855g0040				Nitab4.5_0004359g0040	Nitab4.5_0007762g0010
														Nitab4.5_0001855g0070				Nitab4.5_0004398g0030	Nitab4.5_0007792g0010
														Nitab4.5_0001856g0070				Nitab4.5_0004411g0050	Nitab4.5_0007793g0050
														Nitab4.5_0001857g0030				Nitab4.5_0004426g0030	Nitab4.5_0007812g0060
														Nitab4.5_0001860g0140				Nitab4.5_0004441g0010	Nitab4.5_0007815g0010
														Nitab4.5_0001861g0020				Nitab4.5_0004465g0010	Nitab4.5_0007838g0050
														Nitab4.5_0001861g0120				Nitab4.5_0004469g0040	Nitab4.5_0007860g0010
														Nitab4.5_0001864g0070				Nitab4.5_0004470g0070	Nitab4.5_0007869g0040
														Nitab4.5_0001871g0030				Nitab4.5_0004472g0010	Nitab4.5_0007879g0050
														Nitab4.5_0001876g0060				Nitab4.5_0004474g0020	Nitab4.5_0007906g0020
														Nitab4.5_0001879g0160				Nitab4.5_0004476g0030	Nitab4.5_0007918g0030
														Nitab4.5_0001884g0050				Nitab4.5_0004478g0050	Nitab4.5_0007927g0010
														Nitab4.5_0001884g0060				Nitab4.5_0004506g0120	Nitab4.5_0007945g0010
														Nitab4.5_0001889g0160				Nitab4.5_0004516g0020	Nitab4.5_0007958g0020
														Nitab4.5_0001891g0130				Nitab4.5_0004522g0020	Nitab4.5_0007970g0020
														Nitab4.5_0001896g0070				Nitab4.5_0004528g0020	Nitab4.5_0007975g0030
														Nitab4.5_0001897g0030				Nitab4.5_0004530g0090	Nitab4.5_0007985g0010
														Nitab4.5_0001898g0080				Nitab4.5_0004556g0030	Nitab4.5_0007985g0040
														Nitab4.5_0001899g0070				Nitab4.5_0004562g0020	Nitab4.5_0007992g0040
														Nitab4.5_0001903g0020				Nitab4.5_0004581g0020	Nitab4.5_0007994g0010
														Nitab4.5_0001912g0020				Nitab4.5_0004605g0110	Nitab4.5_0008000g0020
														Nitab4.5_0001913g0040				Nitab4.5_0004614g0010	Nitab4.5_0008015g0010
														Nitab4.5_0001922g0060				Nitab4.5_0004620g0030	Nitab4.5_0008019g0010
														Nitab4.5_0001922g0090				Nitab4.5_0004621g0030	Nitab4.5_0008115g0010
														Nitab4.5_0001924g0060				Nitab4.5_0004625g0030	Nitab4.5_0008126g0020
														Nitab4.5_0001925g0200				Nitab4.5_0004629g0030	Nitab4.5_0008127g0020
														Nitab4.5_0001925g0250				Nitab4.5_0004643g0020	Nitab4.5_0008136g0010
														Nitab4.5_0001931g0030				Nitab4.5_0004644g0020	Nitab4.5_0008145g0020
														Nitab4.5_0001931g0140				Nitab4.5_0004644g0030	Nitab4.5_0008213g0070
														Nitab4.5_0001933g0010				Nitab4.5_0004644g0070	Nitab4.5_0008213g0080
														Nitab4.5_0001935g0040				Nitab4.5_0004645g0010	Nitab4.5_0008216g0020
														Nitab4.5_0001936g0040				Nitab4.5_0004646g0070	Nitab4.5_0008239g0010
														Nitab4.5_0001936g0070				Nitab4.5_0004657g0030	Nitab4.5_0008255g0010
														Nitab4.5_0001949g0070				Nitab4.5_0004658g0040	Nitab4.5_0008269g0020
														Nitab4.5_0001955g0030				Nitab4.5_0004665g0010	Nitab4.5_0008279g0060
														Nitab4.5_0001955g0110				Nitab4.5_0004682g0010	Nitab4.5_0008297g0010
														Nitab4.5_0001960g0030				Nitab4.5_0004682g0020	Nitab4.5_0008336g0010
														Nitab4.5_0001961g0010				Nitab4.5_0004686g0040	Nitab4.5_0008353g0010
														Nitab4.5_0001970g0020				Nitab4.5_0004709g0010	Nitab4.5_0008421g0020
														Nitab4.5_0001979g0030				Nitab4.5_0004711g0030	Nitab4.5_0008471g0060
														Nitab4.5_0001982g0010				Nitab4.5_0004716g0020	Nitab4.5_0008485g0020
														Nitab4.5_0001982g0050				Nitab4.5_0004719g0010	Nitab4.5_0008490g0020
														Nitab4.5_0001982g0120				Nitab4.5_0004728g0030	Nitab4.5_0008522g0060
														Nitab4.5_0001984g0010				Nitab4.5_0004730g0030	Nitab4.5_0008523g0030
														Nitab4.5_0001984g0020				Nitab4.5_0004748g0020	Nitab4.5_0008525g0020
														Nitab4.5_0001984g0100				Nitab4.5_0004756g0060	Nitab4.5_0008526g0010
														Nitab4.5_0001991g0040				Nitab4.5_0004764g0010	Nitab4.5_0008533g0020
														Nitab4.5_0001993g0060				Nitab4.5_0004771g0030	Nitab4.5_0008573g0060
														Nitab4.5_0001996g0080				Nitab4.5_0004773g0010	Nitab4.5_0008580g0020
														Nitab4.5_0001998g0010				Nitab4.5_0004787g0010	Nitab4.5_0008628g0020
														Nitab4.5_0002002g0110				Nitab4.5_0004788g0010	Nitab4.5_0008637g0020
														Nitab4.5_0002003g0010				Nitab4.5_0004807g0040	Nitab4.5_0008730g0050
														Nitab4.5_0002003g0070				Nitab4.5_0004814g0010	Nitab4.5_0008779g0020
														Nitab4.5_0002009g0020				Nitab4.5_0004821g0030	Nitab4.5_0008905g0050
														Nitab4.5_0002009g0030				Nitab4.5_0004836g0030	Nitab4.5_0008928g0010
														Nitab4.5_0002016g0120				Nitab4.5_0004838g0020	Nitab4.5_0008961g0010
														Nitab4.5_0002020g0050				Nitab4.5_0004854g0020	Nitab4.5_0008962g0050
														Nitab4.5_0002033g0020				Nitab4.5_0004859g0050	Nitab4.5_0008963g0030
														Nitab4.5_0002038g0020				Nitab4.5_0004860g0010	Nitab4.5_0008982g0050
														Nitab4.5_0002040g0080				Nitab4.5_0004861g0040	Nitab4.5_0009078g0020
														Nitab4.5_0002042g0060				Nitab4.5_0004868g0030	Nitab4.5_0009182g0010
														Nitab4.5_0002042g0070				Nitab4.5_0004874g0010	Nitab4.5_0009190g0010
														Nitab4.5_0002043g0050				Nitab4.5_0004889g0010	Nitab4.5_0009197g0020
														Nitab4.5_0002044g0020				Nitab4.5_0004905g0020	Nitab4.5_0009202g0010
														Nitab4.5_0002046g0020				Nitab4.5_0004905g0080	Nitab4.5_0009248g0010
														Nitab4.5_0002046g0110				Nitab4.5_0004910g0020	Nitab4.5_0009276g0020
														Nitab4.5_0002050g0020				Nitab4.5_0004920g0030	Nitab4.5_0009284g0020
														Nitab4.5_0002053g0030				Nitab4.5_0004933g0020	Nitab4.5_0009330g0010
														Nitab4.5_0002054g0010				Nitab4.5_0004941g0040	Nitab4.5_0009332g0010
														Nitab4.5_0002064g0040				Nitab4.5_0004957g0010	Nitab4.5_0009392g0010
														Nitab4.5_0002073g0040				Nitab4.5_0004969g0070	Nitab4.5_0009399g0020
														Nitab4.5_0002076g0100				Nitab4.5_0004969g0100	Nitab4.5_0009420g0030
														Nitab4.5_0002079g0020				Nitab4.5_0004983g0040	Nitab4.5_0009440g0040
														Nitab4.5_0002081g0010				Nitab4.5_0004987g0030	Nitab4.5_0009443g0010
														Nitab4.5_0002088g0040				Nitab4.5_0004989g0030	Nitab4.5_0009454g0010
														Nitab4.5_0002090g0040				Nitab4.5_0005011g0020	Nitab4.5_0009463g0010
														Nitab4.5_0002091g0010				Nitab4.5_0005015g0020	Nitab4.5_0009483g0010
														Nitab4.5_0002093g0020				Nitab4.5_0005018g0030	Nitab4.5_0009483g0020
														Nitab4.5_0002093g0090				Nitab4.5_0005030g0010	Nitab4.5_0009493g0010
														Nitab4.5_0002100g0040				Nitab4.5_0005042g0010	Nitab4.5_0009512g0040
														Nitab4.5_0002101g0060				Nitab4.5_0005045g0010	Nitab4.5_0009523g0010
														Nitab4.5_0002103g0020				Nitab4.5_0005049g0020	Nitab4.5_0009582g0020
														Nitab4.5_0002103g0110				Nitab4.5_0005059g0030	Nitab4.5_0009598g0020
														Nitab4.5_0002109g0010				Nitab4.5_0005059g0050	Nitab4.5_0009648g0020
														Nitab4.5_0002109g0020				Nitab4.5_0005079g0040	Nitab4.5_0009705g0010
														Nitab4.5_0002113g0180				Nitab4.5_0005096g0020	Nitab4.5_0009769g0010
														Nitab4.5_0002114g0020				Nitab4.5_0005100g0040	Nitab4.5_0009778g0010
														Nitab4.5_0002115g0020				Nitab4.5_0005101g0010	Nitab4.5_0009788g0040
														Nitab4.5_0002124g0010				Nitab4.5_0005119g0010	Nitab4.5_0009819g0010
														Nitab4.5_0002132g0070				Nitab4.5_0005120g0100	Nitab4.5_0009827g0030
														Nitab4.5_0002137g0130				Nitab4.5_0005133g0020	Nitab4.5_0009895g0020
														Nitab4.5_0002137g0140				Nitab4.5_0005133g0050	Nitab4.5_0009952g0020
														Nitab4.5_0002145g0030				Nitab4.5_0005144g0010	Nitab4.5_0009967g0020
														Nitab4.5_0002150g0010				Nitab4.5_0005159g0040	Nitab4.5_0009972g0030
														Nitab4.5_0002156g0050				Nitab4.5_0005164g0030	Nitab4.5_0009973g0020
														Nitab4.5_0002157g0030				Nitab4.5_0005167g0100	Nitab4.5_0010008g0010
														Nitab4.5_0002157g0130				Nitab4.5_0005189g0010	Nitab4.5_0010037g0020
														Nitab4.5_0002158g0090				Nitab4.5_0005191g0060	Nitab4.5_0010090g0010
														Nitab4.5_0002158g0130				Nitab4.5_0005193g0020	Nitab4.5_0010091g0010
														Nitab4.5_0002161g0050				Nitab4.5_0005206g0010	Nitab4.5_0010112g0020
														Nitab4.5_0002162g0230				Nitab4.5_0005222g0010	Nitab4.5_0010125g0040
														Nitab4.5_0002163g0070				Nitab4.5_0005225g0030	Nitab4.5_0010144g0060
														Nitab4.5_0002167g0030				Nitab4.5_0005226g0010	Nitab4.5_0010145g0010
														Nitab4.5_0002167g0150				Nitab4.5_0005235g0040	Nitab4.5_0010151g0030
														Nitab4.5_0002168g0010				Nitab4.5_0005246g0010	Nitab4.5_0010196g0040
														Nitab4.5_0002172g0020				Nitab4.5_0005266g0020	Nitab4.5_0010198g0010
														Nitab4.5_0002176g0010				Nitab4.5_0005311g0040	Nitab4.5_0010254g0020
														Nitab4.5_0002185g0130				Nitab4.5_0005312g0030	Nitab4.5_0010261g0040
														Nitab4.5_0002186g0060				Nitab4.5_0005320g0010	Nitab4.5_0010275g0010
														Nitab4.5_0002200g0010				Nitab4.5_0005344g0020	Nitab4.5_0010278g0030
														Nitab4.5_0002214g0050				Nitab4.5_0005345g0050	Nitab4.5_0010330g0020
														Nitab4.5_0002216g0020				Nitab4.5_0005353g0010	Nitab4.5_0010331g0010
														Nitab4.5_0002219g0010				Nitab4.5_0005359g0030	Nitab4.5_0010347g0030
														Nitab4.5_0002219g0030				Nitab4.5_0005372g0020	Nitab4.5_0010348g0010
														Nitab4.5_0002221g0060				Nitab4.5_0005373g0010	Nitab4.5_0010362g0010
														Nitab4.5_0002222g0050				Nitab4.5_0005381g0040	Nitab4.5_0010420g0010
														Nitab4.5_0002222g0070				Nitab4.5_0005400g0010	Nitab4.5_0010472g0010
														Nitab4.5_0002224g0130				Nitab4.5_0005401g0040	Nitab4.5_0010523g0020
														Nitab4.5_0002227g0010				Nitab4.5_0005402g0010	Nitab4.5_0010554g0030
														Nitab4.5_0002229g0010				Nitab4.5_0005409g0020	Nitab4.5_0010605g0020
														Nitab4.5_0002229g0130				Nitab4.5_0005428g0030	Nitab4.5_0010630g0010
														Nitab4.5_0002230g0030				Nitab4.5_0005428g0060	Nitab4.5_0010636g0020
														Nitab4.5_0002231g0020				Nitab4.5_0005436g0070	Nitab4.5_0010667g0010
														Nitab4.5_0002231g0070				Nitab4.5_0005466g0020	Nitab4.5_0010692g0020
														Nitab4.5_0002232g0070				Nitab4.5_0005472g0090	Nitab4.5_0010709g0010
														Nitab4.5_0002238g0090				Nitab4.5_0005483g0060	Nitab4.5_0010715g0010
														Nitab4.5_0002253g0010				Nitab4.5_0005504g0030	Nitab4.5_0010781g0010
														Nitab4.5_0002257g0010				Nitab4.5_0005519g0010	Nitab4.5_0010809g0020
														Nitab4.5_0002257g0090				Nitab4.5_0005524g0020	Nitab4.5_0010835g0010
														Nitab4.5_0002259g0010				Nitab4.5_0005550g0030	Nitab4.5_0010979g0010
														Nitab4.5_0002262g0160				Nitab4.5_0005555g0010	Nitab4.5_0011001g0030
														Nitab4.5_0002263g0060				Nitab4.5_0005558g0040	Nitab4.5_0011008g0010
														Nitab4.5_0002269g0030				Nitab4.5_0005572g0010	Nitab4.5_0011134g0010
														Nitab4.5_0002274g0030				Nitab4.5_0005582g0030	Nitab4.5_0011135g0040
														Nitab4.5_0002276g0050				Nitab4.5_0005582g0070	Nitab4.5_0011195g0020
														Nitab4.5_0002278g0070				Nitab4.5_0005609g0080	Nitab4.5_0011232g0010
														Nitab4.5_0002279g0090				Nitab4.5_0005622g0010	Nitab4.5_0011282g0010
														Nitab4.5_0002282g0030				Nitab4.5_0005648g0020	Nitab4.5_0011330g0010
														Nitab4.5_0002282g0120				Nitab4.5_0005653g0020	Nitab4.5_0011399g0020
														Nitab4.5_0002283g0030				Nitab4.5_0005669g0020	Nitab4.5_0011405g0020
														Nitab4.5_0002285g0030				Nitab4.5_0005672g0010	Nitab4.5_0011414g0010
														Nitab4.5_0002285g0060				Nitab4.5_0005710g0020	Nitab4.5_0011428g0010
														Nitab4.5_0002286g0090				Nitab4.5_0005710g0070	Nitab4.5_0011475g0010
														Nitab4.5_0002291g0030				Nitab4.5_0005716g0030	Nitab4.5_0011561g0010
														Nitab4.5_0002294g0130				Nitab4.5_0005717g0010	Nitab4.5_0011578g0040
														Nitab4.5_0002298g0040				Nitab4.5_0005744g0010	Nitab4.5_0011583g0010
														Nitab4.5_0002303g0010				Nitab4.5_0005755g0010	Nitab4.5_0011590g0010
														Nitab4.5_0002303g0040				Nitab4.5_0005764g0010	Nitab4.5_0011630g0010
														Nitab4.5_0002308g0030				Nitab4.5_0005766g0030	Nitab4.5_0011634g0010
														Nitab4.5_0002309g0080				Nitab4.5_0005767g0010	Nitab4.5_0011667g0010
														Nitab4.5_0002310g0010				Nitab4.5_0005779g0060	Nitab4.5_0011671g0010
														Nitab4.5_0002311g0020				Nitab4.5_0005786g0030	Nitab4.5_0011671g0020
														Nitab4.5_0002313g0080				Nitab4.5_0005793g0010	Nitab4.5_0011678g0020
														Nitab4.5_0002315g0030				Nitab4.5_0005793g0050	Nitab4.5_0011716g0020
														Nitab4.5_0002315g0110				Nitab4.5_0005805g0040	Nitab4.5_0011739g0010
														Nitab4.5_0002321g0060				Nitab4.5_0005805g0060	Nitab4.5_0011805g0020
														Nitab4.5_0002322g0170				Nitab4.5_0005814g0010	Nitab4.5_0011877g0010
														Nitab4.5_0002330g0060				Nitab4.5_0005875g0040	Nitab4.5_0011896g0010
														Nitab4.5_0002340g0030				Nitab4.5_0005900g0090	Nitab4.5_0011920g0010
														Nitab4.5_0002340g0070				Nitab4.5_0005923g0010	Nitab4.5_0012005g0010
														Nitab4.5_0002343g0020				Nitab4.5_0005938g0020	Nitab4.5_0012027g0010
														Nitab4.5_0002347g0080				Nitab4.5_0005947g0030	Nitab4.5_0012112g0020
														Nitab4.5_0002350g0030				Nitab4.5_0005948g0010	Nitab4.5_0012115g0010
														Nitab4.5_0002350g0050				Nitab4.5_0005954g0010	Nitab4.5_0012115g0030
														Nitab4.5_0002350g0070				Nitab4.5_0005954g0030	Nitab4.5_0012198g0010
														Nitab4.5_0002352g0120				Nitab4.5_0005960g0010	Nitab4.5_0012224g0020
														Nitab4.5_0002354g0010				Nitab4.5_0006000g0080	Nitab4.5_0012245g0050
														Nitab4.5_0002357g0020				Nitab4.5_0006000g0100	Nitab4.5_0012291g0010
														Nitab4.5_0002361g0050				Nitab4.5_0006014g0060	Nitab4.5_0012320g0020
														Nitab4.5_0002364g0010				Nitab4.5_0006022g0020	Nitab4.5_0012349g0030
														Nitab4.5_0002366g0010				Nitab4.5_0006052g0040	Nitab4.5_0012489g0020
														Nitab4.5_0002367g0020				Nitab4.5_0006055g0010	Nitab4.5_0012663g0010
														Nitab4.5_0002367g0040				Nitab4.5_0006055g0020	Nitab4.5_0012714g0010
														Nitab4.5_0002370g0050				Nitab4.5_0006069g0030	Nitab4.5_0012731g0010
														Nitab4.5_0002377g0030				Nitab4.5_0006073g0030	Nitab4.5_0012752g0010
														Nitab4.5_0002379g0010				Nitab4.5_0006081g0010	Nitab4.5_0012857g0010
														Nitab4.5_0002389g0040				Nitab4.5_0006089g0060	Nitab4.5_0012878g0010
														Nitab4.5_0002392g0100				Nitab4.5_0006090g0010	Nitab4.5_0012932g0010
														Nitab4.5_0002394g0060				Nitab4.5_0006090g0020	Nitab4.5_0012954g0010
														Nitab4.5_0002406g0040				Nitab4.5_0006120g0010	Nitab4.5_0012964g0010
														Nitab4.5_0002415g0020				Nitab4.5_0006120g0060	Nitab4.5_0013033g0010
														Nitab4.5_0002424g0010				Nitab4.5_0006133g0020	Nitab4.5_0013070g0030
														Nitab4.5_0002436g0020				Nitab4.5_0006134g0010	Nitab4.5_0013228g0020
														Nitab4.5_0002437g0020				Nitab4.5_0006134g0080	Nitab4.5_0013243g0020
														Nitab4.5_0002438g0100				Nitab4.5_0006152g0030	Nitab4.5_0013316g0010
														Nitab4.5_0002443g0040				Nitab4.5_0006192g0030	Nitab4.5_0013330g0010
														Nitab4.5_0002446g0130				Nitab4.5_0006201g0010	Nitab4.5_0013378g0020
														Nitab4.5_0002449g0010				Nitab4.5_0006204g0010	Nitab4.5_0013405g0010
														Nitab4.5_0002456g0090				Nitab4.5_0006207g0030	Nitab4.5_0013415g0020
														Nitab4.5_0002456g0130				Nitab4.5_0006213g0040	Nitab4.5_0013698g0010
														Nitab4.5_0002456g0140				Nitab4.5_0006222g0010	Nitab4.5_0014046g0010
														Nitab4.5_0002458g0030				Nitab4.5_0006224g0040	Nitab4.5_0014378g0010
														Nitab4.5_0002459g0050				Nitab4.5_0006225g0050	Nitab4.5_0014470g0010
														Nitab4.5_0002465g0040				Nitab4.5_0006232g0010	Nitab4.5_0014511g0010
														Nitab4.5_0002466g0010				Nitab4.5_0006239g0040	Nitab4.5_0014668g0010
														Nitab4.5_0002467g0090				Nitab4.5_0006258g0010	Nitab4.5_0015055g0010
														Nitab4.5_0002467g0100				Nitab4.5_0006269g0020	Nitab4.5_0015114g0020
														Nitab4.5_0002470g0040				Nitab4.5_0006272g0010	Nitab4.5_0015138g0010
														Nitab4.5_0002479g0010				Nitab4.5_0006280g0030	Nitab4.5_0015193g0010
														Nitab4.5_0002492g0020				Nitab4.5_0006294g0070	Nitab4.5_0015960g0020
														Nitab4.5_0002493g0050				Nitab4.5_0006295g0040	Nitab4.5_0015984g0010
														Nitab4.5_0002495g0050				Nitab4.5_0006297g0010	Nitab4.5_0016068g0010
														Nitab4.5_0002499g0010				Nitab4.5_0006307g0010	Nitab4.5_0016172g0010
														Nitab4.5_0002499g0080				Nitab4.5_0006314g0030	Nitab4.5_0016580g0010
														Nitab4.5_0002500g0070				Nitab4.5_0006315g0010	Nitab4.5_0017196g0010
														Nitab4.5_0002503g0040				Nitab4.5_0006317g0040	Nitab4.5_0017677g0020
														Nitab4.5_0002514g0010				Nitab4.5_0006324g0020	Nitab4.5_0018124g0010
														Nitab4.5_0002520g0080				Nitab4.5_0006332g0010	Nitab4.5_0018289g0010
														Nitab4.5_0002520g0120				Nitab4.5_0006340g0010	Nitab4.5_0018301g0010
														Nitab4.5_0002526g0030				Nitab4.5_0006355g0030	Nitab4.5_0018389g0010
														Nitab4.5_0002526g0070				Nitab4.5_0006367g0020	Nitab4.5_0018794g0010
														Nitab4.5_0002526g0100				Nitab4.5_0006374g0010	Nitab4.5_0019776g0010
														Nitab4.5_0002532g0030				Nitab4.5_0006376g0040	Nitab4.5_0019996g0010
														Nitab4.5_0002534g0040				Nitab4.5_0006378g0040	Nitab4.5_0021283g0010
														Nitab4.5_0002534g0050				Nitab4.5_0006379g0010	Nitab4.5_0021859g0010
														Nitab4.5_0002541g0050				Nitab4.5_0006392g0050	Nitab4.5_0021934g0010
														Nitab4.5_0002542g0020				Nitab4.5_0006398g0010	Nitab4.5_0022569g0020
														Nitab4.5_0002543g0010				Nitab4.5_0006398g0030	Nitab4.5_0023706g0010
														Nitab4.5_0002543g0050				Nitab4.5_0006411g0010	Nitab4.5_0024486g0010
														Nitab4.5_0002545g0060				Nitab4.5_0006429g0060	Nitab4.5_0026365g0010
														Nitab4.5_0002545g0110				Nitab4.5_0006434g0040	Nitab4.5_0026736g0010
														Nitab4.5_0002546g0050				Nitab4.5_0006467g0040	Nitab4.5_0029531g0010
														Nitab4.5_0002548g0010				Nitab4.5_0006475g0040
														Nitab4.5_0002553g0030				Nitab4.5_0006480g0020
														Nitab4.5_0002566g0030				Nitab4.5_0006481g0010
														Nitab4.5_0002567g0050				Nitab4.5_0006483g0010
														Nitab4.5_0002568g0030				Nitab4.5_0006505g0030
														Nitab4.5_0002576g0030				Nitab4.5_0006508g0040
														Nitab4.5_0002577g0030				Nitab4.5_0006516g0020
														Nitab4.5_0002587g0100				Nitab4.5_0006525g0010
														Nitab4.5_0002588g0020				Nitab4.5_0006539g0040
														Nitab4.5_0002589g0070				Nitab4.5_0006558g0010
														Nitab4.5_0002589g0130				Nitab4.5_0006590g0030
														Nitab4.5_0002590g0030				Nitab4.5_0006622g0080
														Nitab4.5_0002599g0030				Nitab4.5_0006642g0020
														Nitab4.5_0002604g0010				Nitab4.5_0006650g0010
														Nitab4.5_0002605g0040				Nitab4.5_0006658g0010
														Nitab4.5_0002607g0070				Nitab4.5_0006685g0020
														Nitab4.5_0002609g0030				Nitab4.5_0006691g0070
														Nitab4.5_0002612g0010				Nitab4.5_0006701g0020
														Nitab4.5_0002612g0100				Nitab4.5_0006706g0030
														Nitab4.5_0002613g0030				Nitab4.5_0006744g0060
														Nitab4.5_0002626g0020				Nitab4.5_0006770g0060
														Nitab4.5_0002627g0010				Nitab4.5_0006785g0010
														Nitab4.5_0002632g0080				Nitab4.5_0006802g0020
														Nitab4.5_0002650g0050				Nitab4.5_0006822g0020
														Nitab4.5_0002650g0060				Nitab4.5_0006833g0020
														Nitab4.5_0002651g0010				Nitab4.5_0006836g0010
														Nitab4.5_0002655g0080				Nitab4.5_0006852g0070
														Nitab4.5_0002671g0110				Nitab4.5_0006852g0080
														Nitab4.5_0002673g0040				Nitab4.5_0006885g0020
														Nitab4.5_0002680g0060				Nitab4.5_0006887g0020
														Nitab4.5_0002682g0060				Nitab4.5_0006905g0010
														Nitab4.5_0002683g0020				Nitab4.5_0006916g0030
														Nitab4.5_0002687g0020				Nitab4.5_0006919g0020
														Nitab4.5_0002691g0080				Nitab4.5_0006950g0010
														Nitab4.5_0002700g0100				Nitab4.5_0006953g0010
														Nitab4.5_0002700g0150				Nitab4.5_0006969g0040
														Nitab4.5_0002715g0060				Nitab4.5_0006970g0030
														Nitab4.5_0002717g0050				Nitab4.5_0006980g0030
														Nitab4.5_0002719g0040				Nitab4.5_0006996g0030
														Nitab4.5_0002720g0030				Nitab4.5_0006996g0040
														Nitab4.5_0002720g0050				Nitab4.5_0006998g0030
														Nitab4.5_0002723g0010				Nitab4.5_0006999g0030
														Nitab4.5_0002728g0060				Nitab4.5_0007026g0010
														Nitab4.5_0002737g0090				Nitab4.5_0007026g0020
														Nitab4.5_0002738g0070				Nitab4.5_0007026g0060
														Nitab4.5_0002740g0110				Nitab4.5_0007034g0010
														Nitab4.5_0002744g0030				Nitab4.5_0007034g0020
														Nitab4.5_0002752g0140				Nitab4.5_0007056g0010
														Nitab4.5_0002755g0080				Nitab4.5_0007063g0070
														Nitab4.5_0002760g0050				Nitab4.5_0007068g0040
														Nitab4.5_0002771g0010				Nitab4.5_0007100g0020
														Nitab4.5_0002772g0010				Nitab4.5_0007124g0010
														Nitab4.5_0002775g0010				Nitab4.5_0007158g0010
														Nitab4.5_0002783g0040				Nitab4.5_0007163g0020
														Nitab4.5_0002783g0140				Nitab4.5_0007164g0010
														Nitab4.5_0002785g0010				Nitab4.5_0007166g0040
														Nitab4.5_0002791g0060				Nitab4.5_0007185g0030
														Nitab4.5_0002791g0070				Nitab4.5_0007185g0070
														Nitab4.5_0002794g0010				Nitab4.5_0007189g0040
														Nitab4.5_0002804g0010				Nitab4.5_0007204g0010
														Nitab4.5_0002805g0170				Nitab4.5_0007240g0030
														Nitab4.5_0002822g0010				Nitab4.5_0007261g0080
														Nitab4.5_0002823g0010				Nitab4.5_0007274g0010
														Nitab4.5_0002823g0070				Nitab4.5_0007378g0010
														Nitab4.5_0002824g0040				Nitab4.5_0007384g0010
														Nitab4.5_0002826g0060				Nitab4.5_0007396g0020
														Nitab4.5_0002829g0040				Nitab4.5_0007413g0020
														Nitab4.5_0002837g0030				Nitab4.5_0007416g0060
														Nitab4.5_0002838g0050				Nitab4.5_0007427g0010
														Nitab4.5_0002845g0070				Nitab4.5_0007466g0010
														Nitab4.5_0002848g0070				Nitab4.5_0007475g0010
														Nitab4.5_0002860g0010				Nitab4.5_0007493g0030
														Nitab4.5_0002862g0020				Nitab4.5_0007505g0020
														Nitab4.5_0002865g0020				Nitab4.5_0007512g0030
														Nitab4.5_0002879g0080				Nitab4.5_0007512g0050
														Nitab4.5_0002886g0100				Nitab4.5_0007513g0010
														Nitab4.5_0002886g0120				Nitab4.5_0007564g0010
														Nitab4.5_0002887g0100				Nitab4.5_0007567g0040
														Nitab4.5_0002892g0020				Nitab4.5_0007575g0010
														Nitab4.5_0002899g0010				Nitab4.5_0007578g0010
														Nitab4.5_0002902g0060				Nitab4.5_0007578g0050
														Nitab4.5_0002904g0100				Nitab4.5_0007589g0020
														Nitab4.5_0002909g0010				Nitab4.5_0007597g0010
														Nitab4.5_0002913g0030				Nitab4.5_0007598g0010
														Nitab4.5_0002914g0090				Nitab4.5_0007598g0030
														Nitab4.5_0002926g0020				Nitab4.5_0007628g0040
														Nitab4.5_0002929g0030				Nitab4.5_0007641g0020
														Nitab4.5_0002932g0010				Nitab4.5_0007650g0040
														Nitab4.5_0002943g0030				Nitab4.5_0007661g0020
														Nitab4.5_0002949g0080				Nitab4.5_0007674g0040
														Nitab4.5_0002957g0010				Nitab4.5_0007686g0010
														Nitab4.5_0002980g0030				Nitab4.5_0007696g0010
														Nitab4.5_0002980g0050				Nitab4.5_0007705g0010
														Nitab4.5_0002986g0080				Nitab4.5_0007722g0010
														Nitab4.5_0002989g0010				Nitab4.5_0007737g0010
														Nitab4.5_0002995g0060				Nitab4.5_0007772g0010
														Nitab4.5_0002996g0010				Nitab4.5_0007792g0010
														Nitab4.5_0002998g0040				Nitab4.5_0007816g0010
														Nitab4.5_0002998g0050				Nitab4.5_0007832g0030
														Nitab4.5_0003002g0010				Nitab4.5_0007838g0050
														Nitab4.5_0003004g0020				Nitab4.5_0007853g0020
														Nitab4.5_0003011g0040				Nitab4.5_0007858g0040
														Nitab4.5_0003013g0020				Nitab4.5_0007883g0020
														Nitab4.5_0003030g0140				Nitab4.5_0007887g0010
														Nitab4.5_0003031g0010				Nitab4.5_0007906g0020
														Nitab4.5_0003033g0050				Nitab4.5_0007909g0010
														Nitab4.5_0003035g0030				Nitab4.5_0007985g0010
														Nitab4.5_0003035g0040				Nitab4.5_0008015g0010
														Nitab4.5_0003039g0040				Nitab4.5_0008020g0010
														Nitab4.5_0003044g0130				Nitab4.5_0008024g0010
														Nitab4.5_0003058g0020				Nitab4.5_0008037g0020
														Nitab4.5_0003058g0050				Nitab4.5_0008037g0060
														Nitab4.5_0003062g0080				Nitab4.5_0008039g0010
														Nitab4.5_0003063g0040				Nitab4.5_0008114g0010
														Nitab4.5_0003066g0030				Nitab4.5_0008115g0010
														Nitab4.5_0003076g0070				Nitab4.5_0008124g0020
														Nitab4.5_0003076g0080				Nitab4.5_0008126g0020
														Nitab4.5_0003077g0050				Nitab4.5_0008127g0020
														Nitab4.5_0003077g0060				Nitab4.5_0008136g0010
														Nitab4.5_0003079g0070				Nitab4.5_0008142g0020
														Nitab4.5_0003080g0080				Nitab4.5_0008156g0030
														Nitab4.5_0003084g0040				Nitab4.5_0008173g0020
														Nitab4.5_0003085g0020				Nitab4.5_0008175g0010
														Nitab4.5_0003086g0020				Nitab4.5_0008177g0020
														Nitab4.5_0003088g0020				Nitab4.5_0008185g0020
														Nitab4.5_0003094g0030				Nitab4.5_0008213g0070
														Nitab4.5_0003097g0010				Nitab4.5_0008218g0020
														Nitab4.5_0003109g0010				Nitab4.5_0008227g0030
														Nitab4.5_0003113g0050				Nitab4.5_0008239g0010
														Nitab4.5_0003114g0110				Nitab4.5_0008247g0020
														Nitab4.5_0003120g0010				Nitab4.5_0008279g0010
														Nitab4.5_0003122g0050				Nitab4.5_0008299g0030
														Nitab4.5_0003127g0020				Nitab4.5_0008303g0010
														Nitab4.5_0003127g0040				Nitab4.5_0008336g0010
														Nitab4.5_0003130g0080				Nitab4.5_0008336g0030
														Nitab4.5_0003137g0010				Nitab4.5_0008348g0010
														Nitab4.5_0003140g0010				Nitab4.5_0008372g0010
														Nitab4.5_0003151g0060				Nitab4.5_0008420g0020
														Nitab4.5_0003154g0050				Nitab4.5_0008421g0020
														Nitab4.5_0003159g0010				Nitab4.5_0008470g0010
														Nitab4.5_0003171g0010				Nitab4.5_0008522g0060
														Nitab4.5_0003179g0010				Nitab4.5_0008561g0010
														Nitab4.5_0003179g0040				Nitab4.5_0008566g0080
														Nitab4.5_0003179g0060				Nitab4.5_0008580g0020
														Nitab4.5_0003180g0060				Nitab4.5_0008594g0010
														Nitab4.5_0003205g0040				Nitab4.5_0008637g0020
														Nitab4.5_0003207g0080				Nitab4.5_0008640g0030
														Nitab4.5_0003212g0030				Nitab4.5_0008728g0010
														Nitab4.5_0003227g0040				Nitab4.5_0008743g0010
														Nitab4.5_0003228g0050				Nitab4.5_0008748g0010
														Nitab4.5_0003229g0060				Nitab4.5_0008755g0010
														Nitab4.5_0003230g0050				Nitab4.5_0008761g0020
														Nitab4.5_0003233g0010				Nitab4.5_0008768g0010
														Nitab4.5_0003234g0090				Nitab4.5_0008787g0010
														Nitab4.5_0003234g0120				Nitab4.5_0008889g0020
														Nitab4.5_0003241g0030				Nitab4.5_0008900g0010
														Nitab4.5_0003244g0020				Nitab4.5_0008908g0010
														Nitab4.5_0003246g0130				Nitab4.5_0008917g0010
														Nitab4.5_0003247g0010				Nitab4.5_0008928g0010
														Nitab4.5_0003251g0040				Nitab4.5_0008928g0020
														Nitab4.5_0003259g0090				Nitab4.5_0008928g0030
														Nitab4.5_0003261g0010				Nitab4.5_0008935g0050
														Nitab4.5_0003261g0020				Nitab4.5_0008943g0030
														Nitab4.5_0003263g0040				Nitab4.5_0008962g0050
														Nitab4.5_0003265g0010				Nitab4.5_0008963g0030
														Nitab4.5_0003265g0050				Nitab4.5_0008982g0050
														Nitab4.5_0003275g0020				Nitab4.5_0009018g0020
														Nitab4.5_0003280g0060				Nitab4.5_0009025g0030
														Nitab4.5_0003294g0030				Nitab4.5_0009088g0010
														Nitab4.5_0003295g0200				Nitab4.5_0009131g0030
														Nitab4.5_0003298g0060				Nitab4.5_0009134g0010
														Nitab4.5_0003298g0070				Nitab4.5_0009181g0010
														Nitab4.5_0003300g0080				Nitab4.5_0009182g0010
														Nitab4.5_0003304g0010				Nitab4.5_0009190g0010
														Nitab4.5_0003309g0050				Nitab4.5_0009201g0010
														Nitab4.5_0003309g0060				Nitab4.5_0009224g0010
														Nitab4.5_0003309g0070				Nitab4.5_0009267g0030
														Nitab4.5_0003310g0010				Nitab4.5_0009284g0020
														Nitab4.5_0003310g0040				Nitab4.5_0009364g0010
														Nitab4.5_0003313g0030				Nitab4.5_0009371g0020
														Nitab4.5_0003313g0050				Nitab4.5_0009392g0010
														Nitab4.5_0003323g0030				Nitab4.5_0009395g0020
														Nitab4.5_0003324g0100				Nitab4.5_0009420g0020
														Nitab4.5_0003328g0120				Nitab4.5_0009420g0030
														Nitab4.5_0003335g0080				Nitab4.5_0009436g0030
														Nitab4.5_0003336g0010				Nitab4.5_0009440g0040
														Nitab4.5_0003338g0090				Nitab4.5_0009454g0010
														Nitab4.5_0003346g0070				Nitab4.5_0009467g0020
														Nitab4.5_0003356g0060				Nitab4.5_0009468g0010
														Nitab4.5_0003373g0060				Nitab4.5_0009483g0010
														Nitab4.5_0003373g0080				Nitab4.5_0009485g0020
														Nitab4.5_0003374g0070				Nitab4.5_0009493g0010
														Nitab4.5_0003380g0010				Nitab4.5_0009495g0020
														Nitab4.5_0003390g0020				Nitab4.5_0009518g0020
														Nitab4.5_0003394g0020				Nitab4.5_0009577g0040
														Nitab4.5_0003401g0090				Nitab4.5_0009608g0010
														Nitab4.5_0003407g0030				Nitab4.5_0009613g0040
														Nitab4.5_0003408g0110				Nitab4.5_0009622g0010
														Nitab4.5_0003412g0060				Nitab4.5_0009623g0010
														Nitab4.5_0003418g0030				Nitab4.5_0009635g0010
														Nitab4.5_0003419g0070				Nitab4.5_0009680g0010
														Nitab4.5_0003432g0060				Nitab4.5_0009739g0050
														Nitab4.5_0003436g0010				Nitab4.5_0009751g0020
														Nitab4.5_0003436g0020				Nitab4.5_0009760g0010
														Nitab4.5_0003446g0030				Nitab4.5_0009769g0010
														Nitab4.5_0003463g0060				Nitab4.5_0009792g0010
														Nitab4.5_0003466g0070				Nitab4.5_0009795g0010
														Nitab4.5_0003470g0050				Nitab4.5_0009795g0020
														Nitab4.5_0003470g0060				Nitab4.5_0009806g0020
														Nitab4.5_0003472g0010				Nitab4.5_0009827g0030
														Nitab4.5_0003473g0040				Nitab4.5_0009835g0020
														Nitab4.5_0003474g0020				Nitab4.5_0009895g0020
														Nitab4.5_0003476g0010				Nitab4.5_0009942g0020
														Nitab4.5_0003491g0060				Nitab4.5_0009945g0010
														Nitab4.5_0003496g0010				Nitab4.5_0009955g0050
														Nitab4.5_0003513g0010				Nitab4.5_0009972g0010
														Nitab4.5_0003524g0020				Nitab4.5_0009972g0030
														Nitab4.5_0003526g0020				Nitab4.5_0009973g0020
														Nitab4.5_0003531g0060				Nitab4.5_0009973g0030
														Nitab4.5_0003534g0110				Nitab4.5_0010091g0010
														Nitab4.5_0003542g0100				Nitab4.5_0010102g0010
														Nitab4.5_0003548g0040				Nitab4.5_0010112g0020
														Nitab4.5_0003551g0090				Nitab4.5_0010117g0020
														Nitab4.5_0003564g0020				Nitab4.5_0010125g0040
														Nitab4.5_0003580g0050				Nitab4.5_0010145g0010
														Nitab4.5_0003580g0060				Nitab4.5_0010196g0040
														Nitab4.5_0003583g0030				Nitab4.5_0010222g0050
														Nitab4.5_0003588g0050				Nitab4.5_0010254g0020
														Nitab4.5_0003602g0030				Nitab4.5_0010294g0020
														Nitab4.5_0003603g0040				Nitab4.5_0010294g0030
														Nitab4.5_0003603g0120				Nitab4.5_0010295g0010
														Nitab4.5_0003610g0020				Nitab4.5_0010305g0010
														Nitab4.5_0003626g0040				Nitab4.5_0010315g0010
														Nitab4.5_0003626g0120				Nitab4.5_0010330g0020
														Nitab4.5_0003626g0130				Nitab4.5_0010345g0010
														Nitab4.5_0003628g0030				Nitab4.5_0010347g0030
														Nitab4.5_0003631g0010				Nitab4.5_0010408g0030
														Nitab4.5_0003654g0010				Nitab4.5_0010434g0040
														Nitab4.5_0003694g0050				Nitab4.5_0010472g0010
														Nitab4.5_0003698g0070				Nitab4.5_0010486g0010
														Nitab4.5_0003716g0110				Nitab4.5_0010567g0020
														Nitab4.5_0003721g0020				Nitab4.5_0010603g0030
														Nitab4.5_0003741g0010				Nitab4.5_0010616g0010
														Nitab4.5_0003745g0060				Nitab4.5_0010623g0010
														Nitab4.5_0003746g0030				Nitab4.5_0010636g0020
														Nitab4.5_0003763g0020				Nitab4.5_0010672g0010
														Nitab4.5_0003768g0010				Nitab4.5_0010693g0010
														Nitab4.5_0003769g0040				Nitab4.5_0010695g0060
														Nitab4.5_0003774g0040				Nitab4.5_0010768g0030
														Nitab4.5_0003779g0050				Nitab4.5_0010804g0010
														Nitab4.5_0003779g0120				Nitab4.5_0010809g0020
														Nitab4.5_0003795g0010				Nitab4.5_0010835g0010
														Nitab4.5_0003796g0030				Nitab4.5_0010847g0010
														Nitab4.5_0003796g0080				Nitab4.5_0010891g0030
														Nitab4.5_0003802g0020				Nitab4.5_0010919g0010
														Nitab4.5_0003815g0080				Nitab4.5_0010979g0030
														Nitab4.5_0003818g0040				Nitab4.5_0011001g0030
														Nitab4.5_0003820g0040				Nitab4.5_0011008g0010
														Nitab4.5_0003822g0010				Nitab4.5_0011027g0010
														Nitab4.5_0003823g0040				Nitab4.5_0011041g0010
														Nitab4.5_0003827g0010				Nitab4.5_0011079g0020
														Nitab4.5_0003838g0030				Nitab4.5_0011122g0010
														Nitab4.5_0003848g0020				Nitab4.5_0011132g0020
														Nitab4.5_0003848g0030				Nitab4.5_0011134g0010
														Nitab4.5_0003857g0040				Nitab4.5_0011135g0040
														Nitab4.5_0003858g0010				Nitab4.5_0011186g0020
														Nitab4.5_0003858g0090				Nitab4.5_0011193g0010
														Nitab4.5_0003861g0030				Nitab4.5_0011195g0020
														Nitab4.5_0003868g0020				Nitab4.5_0011210g0010
														Nitab4.5_0003875g0020				Nitab4.5_0011211g0010
														Nitab4.5_0003883g0030				Nitab4.5_0011212g0020
														Nitab4.5_0003885g0020				Nitab4.5_0011232g0010
														Nitab4.5_0003885g0100				Nitab4.5_0011237g0010
														Nitab4.5_0003886g0040				Nitab4.5_0011320g0010
														Nitab4.5_0003889g0040				Nitab4.5_0011330g0010
														Nitab4.5_0003901g0020				Nitab4.5_0011386g0010
														Nitab4.5_0003906g0010				Nitab4.5_0011394g0020
														Nitab4.5_0003906g0030				Nitab4.5_0011405g0010
														Nitab4.5_0003914g0050				Nitab4.5_0011414g0010
														Nitab4.5_0003925g0010				Nitab4.5_0011475g0010
														Nitab4.5_0003930g0030				Nitab4.5_0011483g0020
														Nitab4.5_0003967g0020				Nitab4.5_0011528g0010
														Nitab4.5_0003976g0050				Nitab4.5_0011545g0020
														Nitab4.5_0003981g0030				Nitab4.5_0011561g0010
														Nitab4.5_0003981g0080				Nitab4.5_0011578g0040
														Nitab4.5_0003995g0030				Nitab4.5_0011630g0010
														Nitab4.5_0003995g0040				Nitab4.5_0011667g0010
														Nitab4.5_0004010g0020				Nitab4.5_0011671g0010
														Nitab4.5_0004011g0020				Nitab4.5_0011671g0020
														Nitab4.5_0004013g0020				Nitab4.5_0011678g0020
														Nitab4.5_0004026g0020				Nitab4.5_0011712g0010
														Nitab4.5_0004030g0030				Nitab4.5_0011739g0010
														Nitab4.5_0004030g0050				Nitab4.5_0011810g0030
														Nitab4.5_0004036g0010				Nitab4.5_0011813g0010
														Nitab4.5_0004036g0020				Nitab4.5_0011858g0010
														Nitab4.5_0004038g0020				Nitab4.5_0011862g0010
														Nitab4.5_0004038g0030				Nitab4.5_0011877g0010
														Nitab4.5_0004054g0020				Nitab4.5_0011908g0010
														Nitab4.5_0004059g0020				Nitab4.5_0011996g0020
														Nitab4.5_0004059g0030				Nitab4.5_0012005g0010
														Nitab4.5_0004087g0010				Nitab4.5_0012018g0010
														Nitab4.5_0004088g0080				Nitab4.5_0012027g0010
														Nitab4.5_0004095g0050				Nitab4.5_0012096g0010
														Nitab4.5_0004097g0050				Nitab4.5_0012102g0010
														Nitab4.5_0004108g0020				Nitab4.5_0012102g0020
														Nitab4.5_0004114g0060				Nitab4.5_0012112g0020
														Nitab4.5_0004125g0020				Nitab4.5_0012115g0030
														Nitab4.5_0004129g0010				Nitab4.5_0012198g0010
														Nitab4.5_0004144g0010				Nitab4.5_0012245g0040
														Nitab4.5_0004154g0040				Nitab4.5_0012351g0020
														Nitab4.5_0004156g0010				Nitab4.5_0012400g0010
														Nitab4.5_0004160g0010				Nitab4.5_0012449g0010
														Nitab4.5_0004164g0040				Nitab4.5_0012489g0020
														Nitab4.5_0004168g0140				Nitab4.5_0012494g0030
														Nitab4.5_0004170g0020				Nitab4.5_0012586g0020
														Nitab4.5_0004181g0040				Nitab4.5_0012660g0020
														Nitab4.5_0004194g0030				Nitab4.5_0012697g0010
														Nitab4.5_0004194g0100				Nitab4.5_0012714g0010
														Nitab4.5_0004200g0090				Nitab4.5_0012716g0010
														Nitab4.5_0004209g0030				Nitab4.5_0012731g0010
														Nitab4.5_0004217g0030				Nitab4.5_0012752g0010
														Nitab4.5_0004227g0010				Nitab4.5_0012800g0010
														Nitab4.5_0004230g0010				Nitab4.5_0012805g0010
														Nitab4.5_0004236g0010				Nitab4.5_0012878g0010
														Nitab4.5_0004249g0030				Nitab4.5_0012895g0010
														Nitab4.5_0004251g0010				Nitab4.5_0012929g0010
														Nitab4.5_0004270g0010				Nitab4.5_0012932g0010
														Nitab4.5_0004271g0060				Nitab4.5_0012950g0010
														Nitab4.5_0004274g0050				Nitab4.5_0012964g0010
														Nitab4.5_0004276g0020				Nitab4.5_0013079g0020
														Nitab4.5_0004277g0030				Nitab4.5_0013086g0010
														Nitab4.5_0004286g0050				Nitab4.5_0013168g0010
														Nitab4.5_0004294g0010				Nitab4.5_0013228g0020
														Nitab4.5_0004308g0030				Nitab4.5_0013243g0020
														Nitab4.5_0004311g0010				Nitab4.5_0013311g0010
														Nitab4.5_0004338g0040				Nitab4.5_0013322g0010
														Nitab4.5_0004342g0050				Nitab4.5_0013378g0020
														Nitab4.5_0004349g0020				Nitab4.5_0013415g0010
														Nitab4.5_0004355g0050				Nitab4.5_0013425g0030
														Nitab4.5_0004359g0040				Nitab4.5_0013433g0010
														Nitab4.5_0004360g0050				Nitab4.5_0013455g0010
														Nitab4.5_0004362g0040				Nitab4.5_0013628g0010
														Nitab4.5_0004375g0040				Nitab4.5_0013685g0010
														Nitab4.5_0004389g0010				Nitab4.5_0013754g0020
														Nitab4.5_0004395g0020				Nitab4.5_0014046g0010
														Nitab4.5_0004411g0010				Nitab4.5_0014470g0010
														Nitab4.5_0004415g0010				Nitab4.5_0014668g0010
														Nitab4.5_0004422g0030				Nitab4.5_0014729g0010
														Nitab4.5_0004423g0010				Nitab4.5_0014858g0020
														Nitab4.5_0004430g0020				Nitab4.5_0015055g0010
														Nitab4.5_0004430g0080				Nitab4.5_0015114g0020
														Nitab4.5_0004430g0090				Nitab4.5_0015183g0010
														Nitab4.5_0004430g0110				Nitab4.5_0015362g0010
														Nitab4.5_0004438g0060				Nitab4.5_0015407g0010
														Nitab4.5_0004441g0010				Nitab4.5_0015619g0010
														Nitab4.5_0004443g0040				Nitab4.5_0015894g0010
														Nitab4.5_0004448g0010				Nitab4.5_0015960g0010
														Nitab4.5_0004463g0030				Nitab4.5_0015960g0020
														Nitab4.5_0004515g0040				Nitab4.5_0016172g0010
														Nitab4.5_0004516g0020				Nitab4.5_0016396g0010
														Nitab4.5_0004523g0050				Nitab4.5_0017035g0010
														Nitab4.5_0004528g0020				Nitab4.5_0017196g0010
														Nitab4.5_0004529g0010				Nitab4.5_0017907g0010
														Nitab4.5_0004530g0060				Nitab4.5_0018289g0010
														Nitab4.5_0004530g0090				Nitab4.5_0018301g0010
														Nitab4.5_0004537g0030				Nitab4.5_0018389g0010
														Nitab4.5_0004550g0040				Nitab4.5_0018681g0010
														Nitab4.5_0004551g0010				Nitab4.5_0018794g0010
														Nitab4.5_0004556g0030				Nitab4.5_0019776g0010
														Nitab4.5_0004579g0030				Nitab4.5_0019996g0010
														Nitab4.5_0004581g0030				Nitab4.5_0020598g0010
														Nitab4.5_0004585g0050				Nitab4.5_0021096g0010
														Nitab4.5_0004588g0020				Nitab4.5_0021934g0010
														Nitab4.5_0004594g0050				Nitab4.5_0022020g0010
														Nitab4.5_0004605g0080				Nitab4.5_0022042g0010
														Nitab4.5_0004610g0010				Nitab4.5_0022250g0010
														Nitab4.5_0004614g0010				Nitab4.5_0022765g0010
														Nitab4.5_0004621g0030				Nitab4.5_0023530g0010
														Nitab4.5_0004625g0020				Nitab4.5_0023782g0010
														Nitab4.5_0004625g0030				Nitab4.5_0024309g0010
														Nitab4.5_0004629g0030				Nitab4.5_0024486g0010
														Nitab4.5_0004637g0070				Nitab4.5_0024705g0010
														Nitab4.5_0004644g0070				Nitab4.5_0025012g0010
														Nitab4.5_0004645g0020				Nitab4.5_0026398g0010
														Nitab4.5_0004646g0080				Nitab4.5_0027922g0010
														Nitab4.5_0004657g0030				Nitab4.5_0028143g0010
														Nitab4.5_0004668g0080				Nitab4.5_0028651g0010
														Nitab4.5_0004670g0020
														Nitab4.5_0004679g0020
														Nitab4.5_0004679g0080
														Nitab4.5_0004682g0010
														Nitab4.5_0004686g0040
														Nitab4.5_0004694g0040
														Nitab4.5_0004697g0010
														Nitab4.5_0004701g0070
														Nitab4.5_0004706g0010
														Nitab4.5_0004709g0010
														Nitab4.5_0004710g0010
														Nitab4.5_0004716g0010
														Nitab4.5_0004716g0020
														Nitab4.5_0004721g0020
														Nitab4.5_0004730g0030
														Nitab4.5_0004730g0040
														Nitab4.5_0004738g0040
														Nitab4.5_0004738g0060
														Nitab4.5_0004744g0050
														Nitab4.5_0004756g0030
														Nitab4.5_0004756g0060
														Nitab4.5_0004773g0010
														Nitab4.5_0004783g0020
														Nitab4.5_0004785g0050
														Nitab4.5_0004799g0010
														Nitab4.5_0004800g0070
														Nitab4.5_0004802g0010
														Nitab4.5_0004807g0040
														Nitab4.5_0004814g0010
														Nitab4.5_0004821g0020
														Nitab4.5_0004821g0040
														Nitab4.5_0004833g0060
														Nitab4.5_0004835g0030
														Nitab4.5_0004844g0040
														Nitab4.5_0004847g0040
														Nitab4.5_0004854g0010
														Nitab4.5_0004859g0050
														Nitab4.5_0004860g0010
														Nitab4.5_0004861g0040
														Nitab4.5_0004874g0010
														Nitab4.5_0004875g0010
														Nitab4.5_0004881g0010
														Nitab4.5_0004887g0040
														Nitab4.5_0004889g0010
														Nitab4.5_0004895g0060
														Nitab4.5_0004895g0080
														Nitab4.5_0004899g0110
														Nitab4.5_0004910g0020
														Nitab4.5_0004912g0010
														Nitab4.5_0004920g0030
														Nitab4.5_0004940g0020
														Nitab4.5_0004941g0010
														Nitab4.5_0004955g0020
														Nitab4.5_0004968g0010
														Nitab4.5_0004983g0040
														Nitab4.5_0004985g0050
														Nitab4.5_0004987g0030
														Nitab4.5_0004989g0030
														Nitab4.5_0005003g0030
														Nitab4.5_0005011g0020
														Nitab4.5_0005011g0070
														Nitab4.5_0005015g0020
														Nitab4.5_0005029g0030
														Nitab4.5_0005031g0050
														Nitab4.5_0005031g0060
														Nitab4.5_0005040g0030
														Nitab4.5_0005042g0010
														Nitab4.5_0005045g0010
														Nitab4.5_0005049g0020
														Nitab4.5_0005076g0020
														Nitab4.5_0005083g0010
														Nitab4.5_0005084g0030
														Nitab4.5_0005090g0030
														Nitab4.5_0005116g0010
														Nitab4.5_0005119g0020
														Nitab4.5_0005133g0020
														Nitab4.5_0005144g0010
														Nitab4.5_0005159g0040
														Nitab4.5_0005160g0030
														Nitab4.5_0005164g0030
														Nitab4.5_0005172g0010
														Nitab4.5_0005173g0020
														Nitab4.5_0005189g0010
														Nitab4.5_0005191g0020
														Nitab4.5_0005193g0020
														Nitab4.5_0005195g0040
														Nitab4.5_0005196g0020
														Nitab4.5_0005196g0060
														Nitab4.5_0005222g0010
														Nitab4.5_0005227g0010
														Nitab4.5_0005229g0030
														Nitab4.5_0005235g0040
														Nitab4.5_0005246g0010
														Nitab4.5_0005259g0020
														Nitab4.5_0005285g0010
														Nitab4.5_0005301g0010
														Nitab4.5_0005312g0030
														Nitab4.5_0005313g0030
														Nitab4.5_0005319g0030
														Nitab4.5_0005320g0010
														Nitab4.5_0005333g0030
														Nitab4.5_0005335g0020
														Nitab4.5_0005344g0020
														Nitab4.5_0005354g0020
														Nitab4.5_0005359g0030
														Nitab4.5_0005366g0060
														Nitab4.5_0005367g0010
														Nitab4.5_0005382g0020
														Nitab4.5_0005393g0020
														Nitab4.5_0005395g0010
														Nitab4.5_0005396g0010
														Nitab4.5_0005400g0020
														Nitab4.5_0005402g0010
														Nitab4.5_0005407g0020
														Nitab4.5_0005409g0020
														Nitab4.5_0005409g0030
														Nitab4.5_0005413g0030
														Nitab4.5_0005414g0010
														Nitab4.5_0005428g0060
														Nitab4.5_0005432g0030
														Nitab4.5_0005440g0070
														Nitab4.5_0005441g0020
														Nitab4.5_0005458g0010
														Nitab4.5_0005466g0020
														Nitab4.5_0005474g0040
														Nitab4.5_0005474g0060
														Nitab4.5_0005476g0020
														Nitab4.5_0005493g0010
														Nitab4.5_0005499g0010
														Nitab4.5_0005508g0010
														Nitab4.5_0005509g0010
														Nitab4.5_0005512g0020
														Nitab4.5_0005525g0060
														Nitab4.5_0005545g0050
														Nitab4.5_0005555g0010
														Nitab4.5_0005558g0040
														Nitab4.5_0005565g0040
														Nitab4.5_0005572g0010
														Nitab4.5_0005577g0010
														Nitab4.5_0005579g0030
														Nitab4.5_0005583g0030
														Nitab4.5_0005583g0040
														Nitab4.5_0005615g0010
														Nitab4.5_0005626g0030
														Nitab4.5_0005632g0010
														Nitab4.5_0005653g0020
														Nitab4.5_0005673g0010
														Nitab4.5_0005678g0020
														Nitab4.5_0005691g0010
														Nitab4.5_0005691g0020
														Nitab4.5_0005700g0010
														Nitab4.5_0005700g0040
														Nitab4.5_0005709g0010
														Nitab4.5_0005710g0010
														Nitab4.5_0005710g0020
														Nitab4.5_0005716g0030
														Nitab4.5_0005726g0010
														Nitab4.5_0005744g0010
														Nitab4.5_0005756g0030
														Nitab4.5_0005756g0040
														Nitab4.5_0005769g0080
														Nitab4.5_0005774g0010
														Nitab4.5_0005793g0010
														Nitab4.5_0005793g0050
														Nitab4.5_0005805g0040
														Nitab4.5_0005805g0060
														Nitab4.5_0005814g0010
														Nitab4.5_0005820g0040
														Nitab4.5_0005838g0020
														Nitab4.5_0005850g0040
														Nitab4.5_0005860g0050
														Nitab4.5_0005862g0020
														Nitab4.5_0005873g0020
														Nitab4.5_0005879g0020
														Nitab4.5_0005885g0010
														Nitab4.5_0005886g0020
														Nitab4.5_0005892g0020
														Nitab4.5_0005906g0010
														Nitab4.5_0005908g0080
														Nitab4.5_0005916g0030
														Nitab4.5_0005923g0010
														Nitab4.5_0005926g0020
														Nitab4.5_0005934g0050
														Nitab4.5_0005936g0030
														Nitab4.5_0005947g0030
														Nitab4.5_0005948g0010
														Nitab4.5_0005954g0010
														Nitab4.5_0005987g0010
														Nitab4.5_0005993g0010
														Nitab4.5_0005998g0010
														Nitab4.5_0006000g0080
														Nitab4.5_0006007g0010
														Nitab4.5_0006014g0010
														Nitab4.5_0006014g0070
														Nitab4.5_0006018g0090
														Nitab4.5_0006022g0020
														Nitab4.5_0006037g0010
														Nitab4.5_0006039g0010
														Nitab4.5_0006040g0010
														Nitab4.5_0006052g0040
														Nitab4.5_0006055g0010
														Nitab4.5_0006071g0090
														Nitab4.5_0006073g0030
														Nitab4.5_0006081g0010
														Nitab4.5_0006090g0020
														Nitab4.5_0006096g0020
														Nitab4.5_0006121g0020
														Nitab4.5_0006142g0010
														Nitab4.5_0006148g0040
														Nitab4.5_0006156g0030
														Nitab4.5_0006174g0010
														Nitab4.5_0006176g0010
														Nitab4.5_0006180g0020
														Nitab4.5_0006192g0030
														Nitab4.5_0006201g0010
														Nitab4.5_0006204g0010
														Nitab4.5_0006222g0010
														Nitab4.5_0006222g0030
														Nitab4.5_0006224g0020
														Nitab4.5_0006224g0030
														Nitab4.5_0006224g0040
														Nitab4.5_0006229g0010
														Nitab4.5_0006238g0020
														Nitab4.5_0006246g0010
														Nitab4.5_0006269g0020
														Nitab4.5_0006282g0060
														Nitab4.5_0006294g0070
														Nitab4.5_0006317g0040
														Nitab4.5_0006318g0040
														Nitab4.5_0006328g0020
														Nitab4.5_0006360g0010
														Nitab4.5_0006365g0050
														Nitab4.5_0006367g0020
														Nitab4.5_0006367g0030
														Nitab4.5_0006379g0010
														Nitab4.5_0006384g0020
														Nitab4.5_0006389g0020
														Nitab4.5_0006391g0020
														Nitab4.5_0006392g0050
														Nitab4.5_0006408g0010
[truncated: 566 more rows]
